# Supplementary material
Source: ML conference proceedings conference paper supplement (https://openreview.net/forum?id=vBlzen37i0)

LogKL coeff. Boussinesq  $u \in \mathbf{L}^4(\Omega)$ ,  $d = 8$

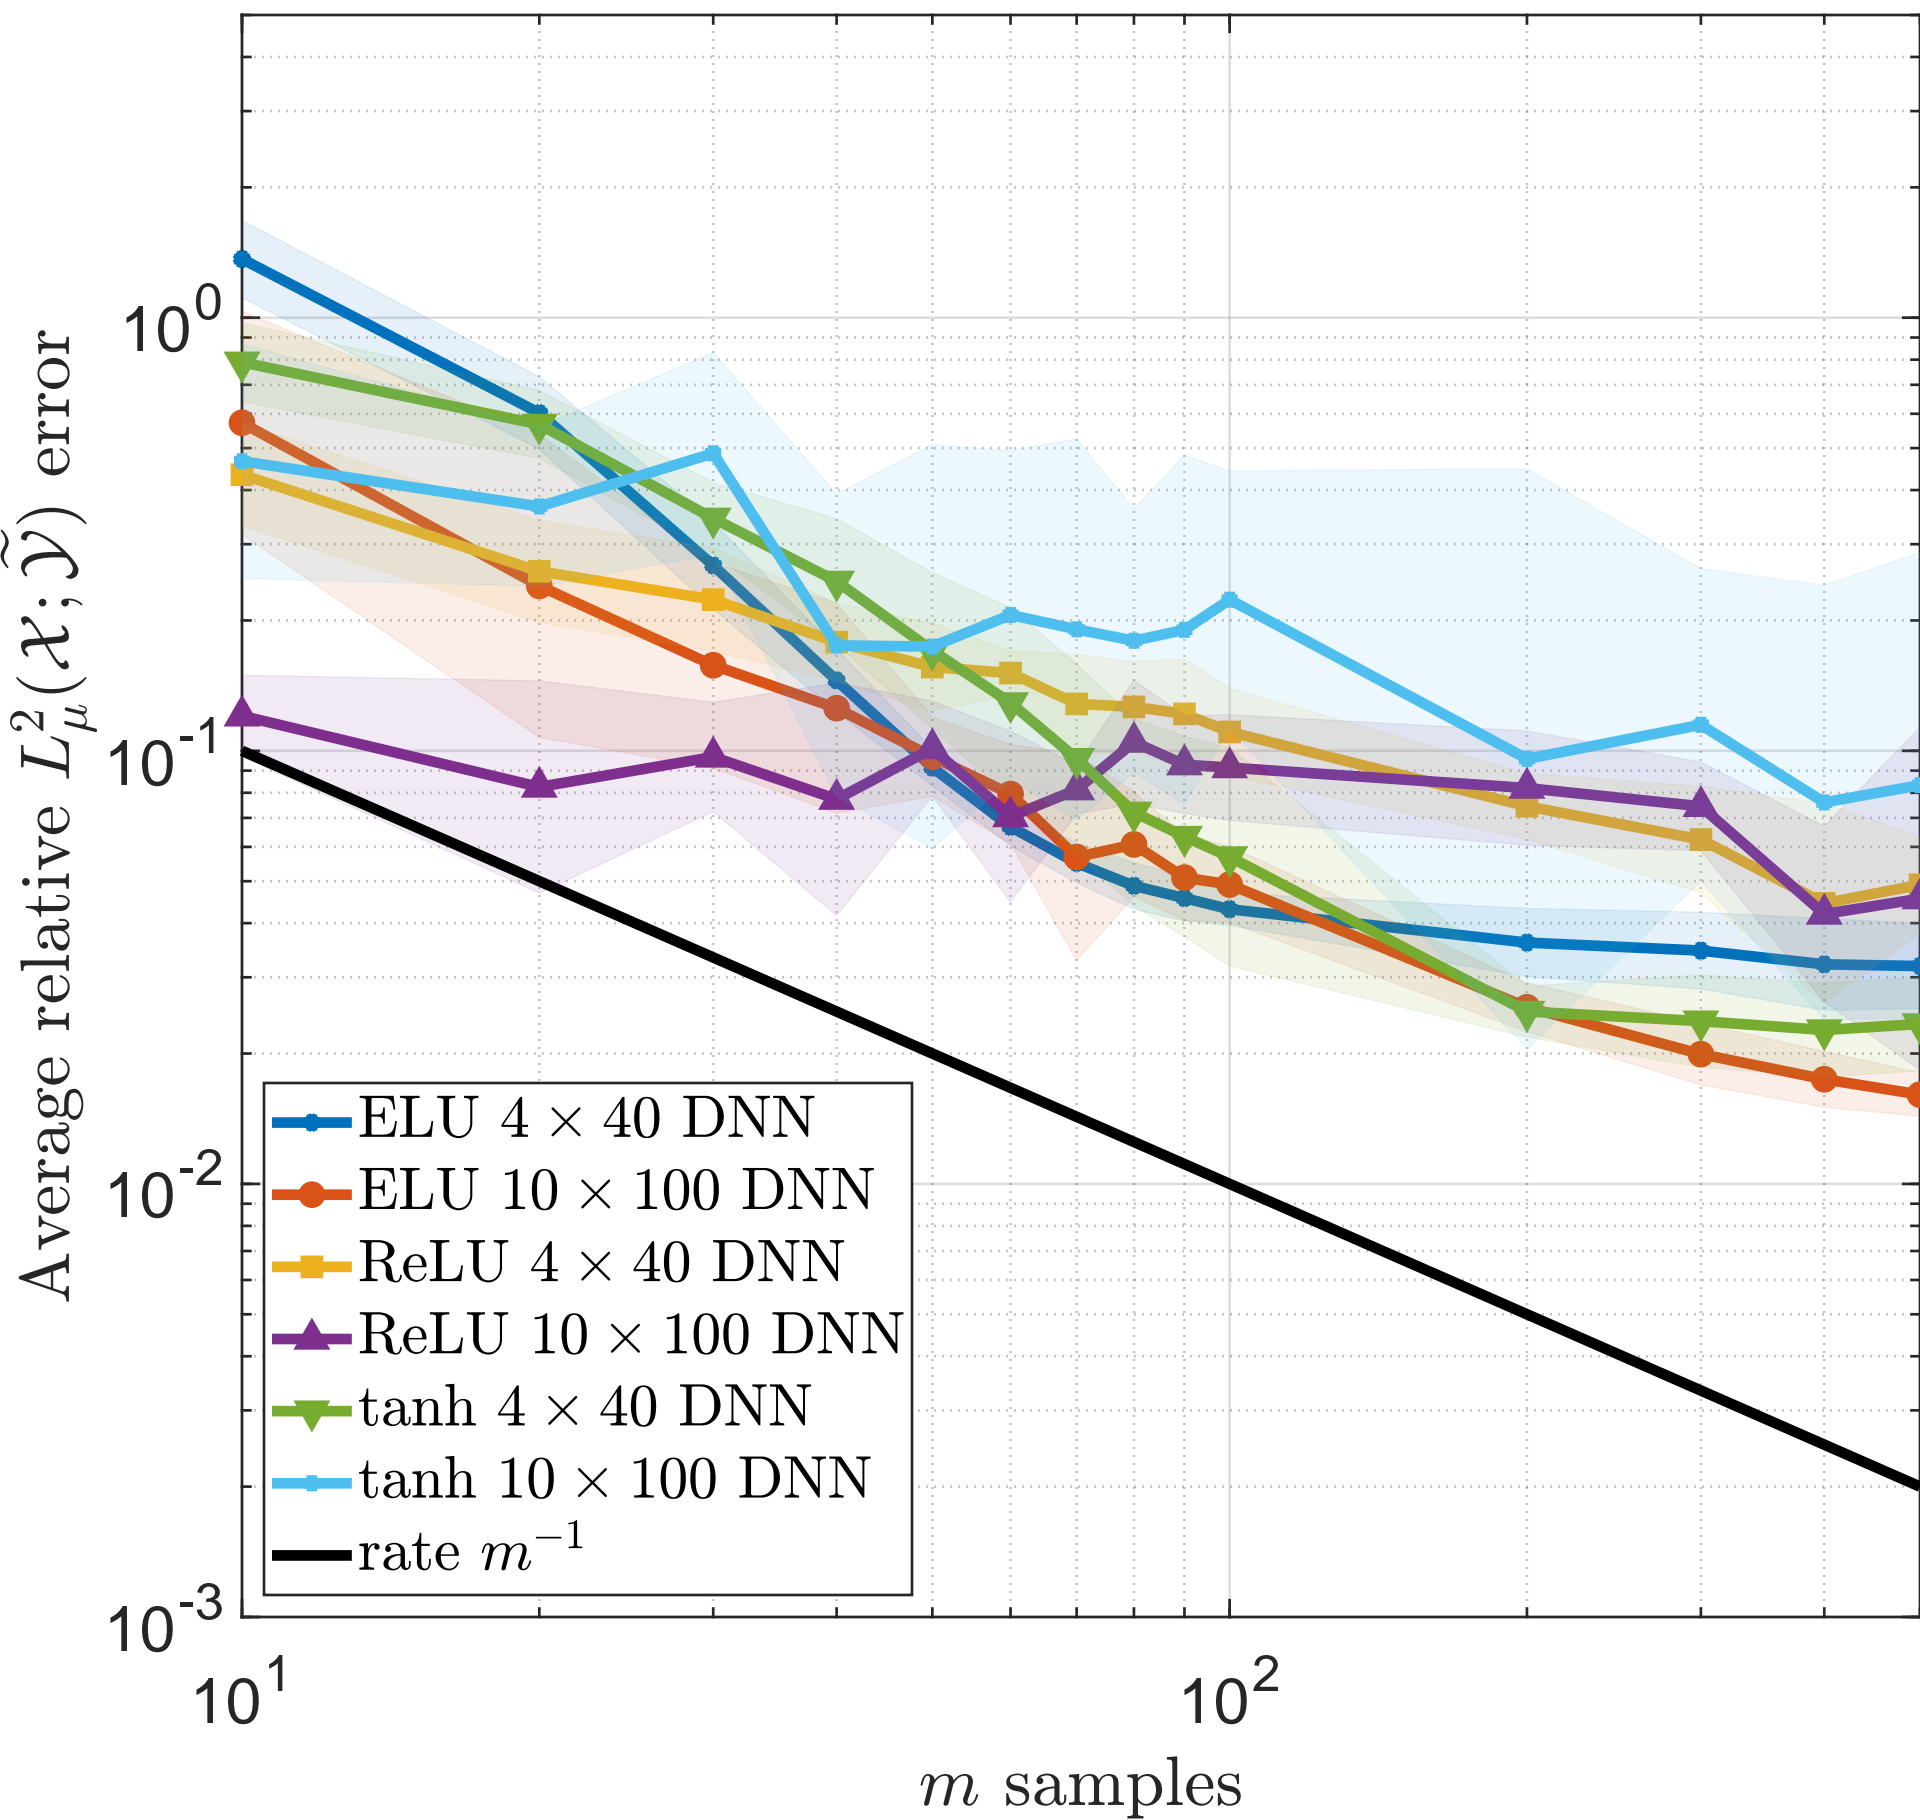

Supplement: supplementary_material [file attachment]

Affine coeff. Boussinesq  $u \in L^4(\Omega)$ ,  $d = 4$

Average relative  $L^2_{\theta}(\mathcal{U}; L^4(\Omega))$  error

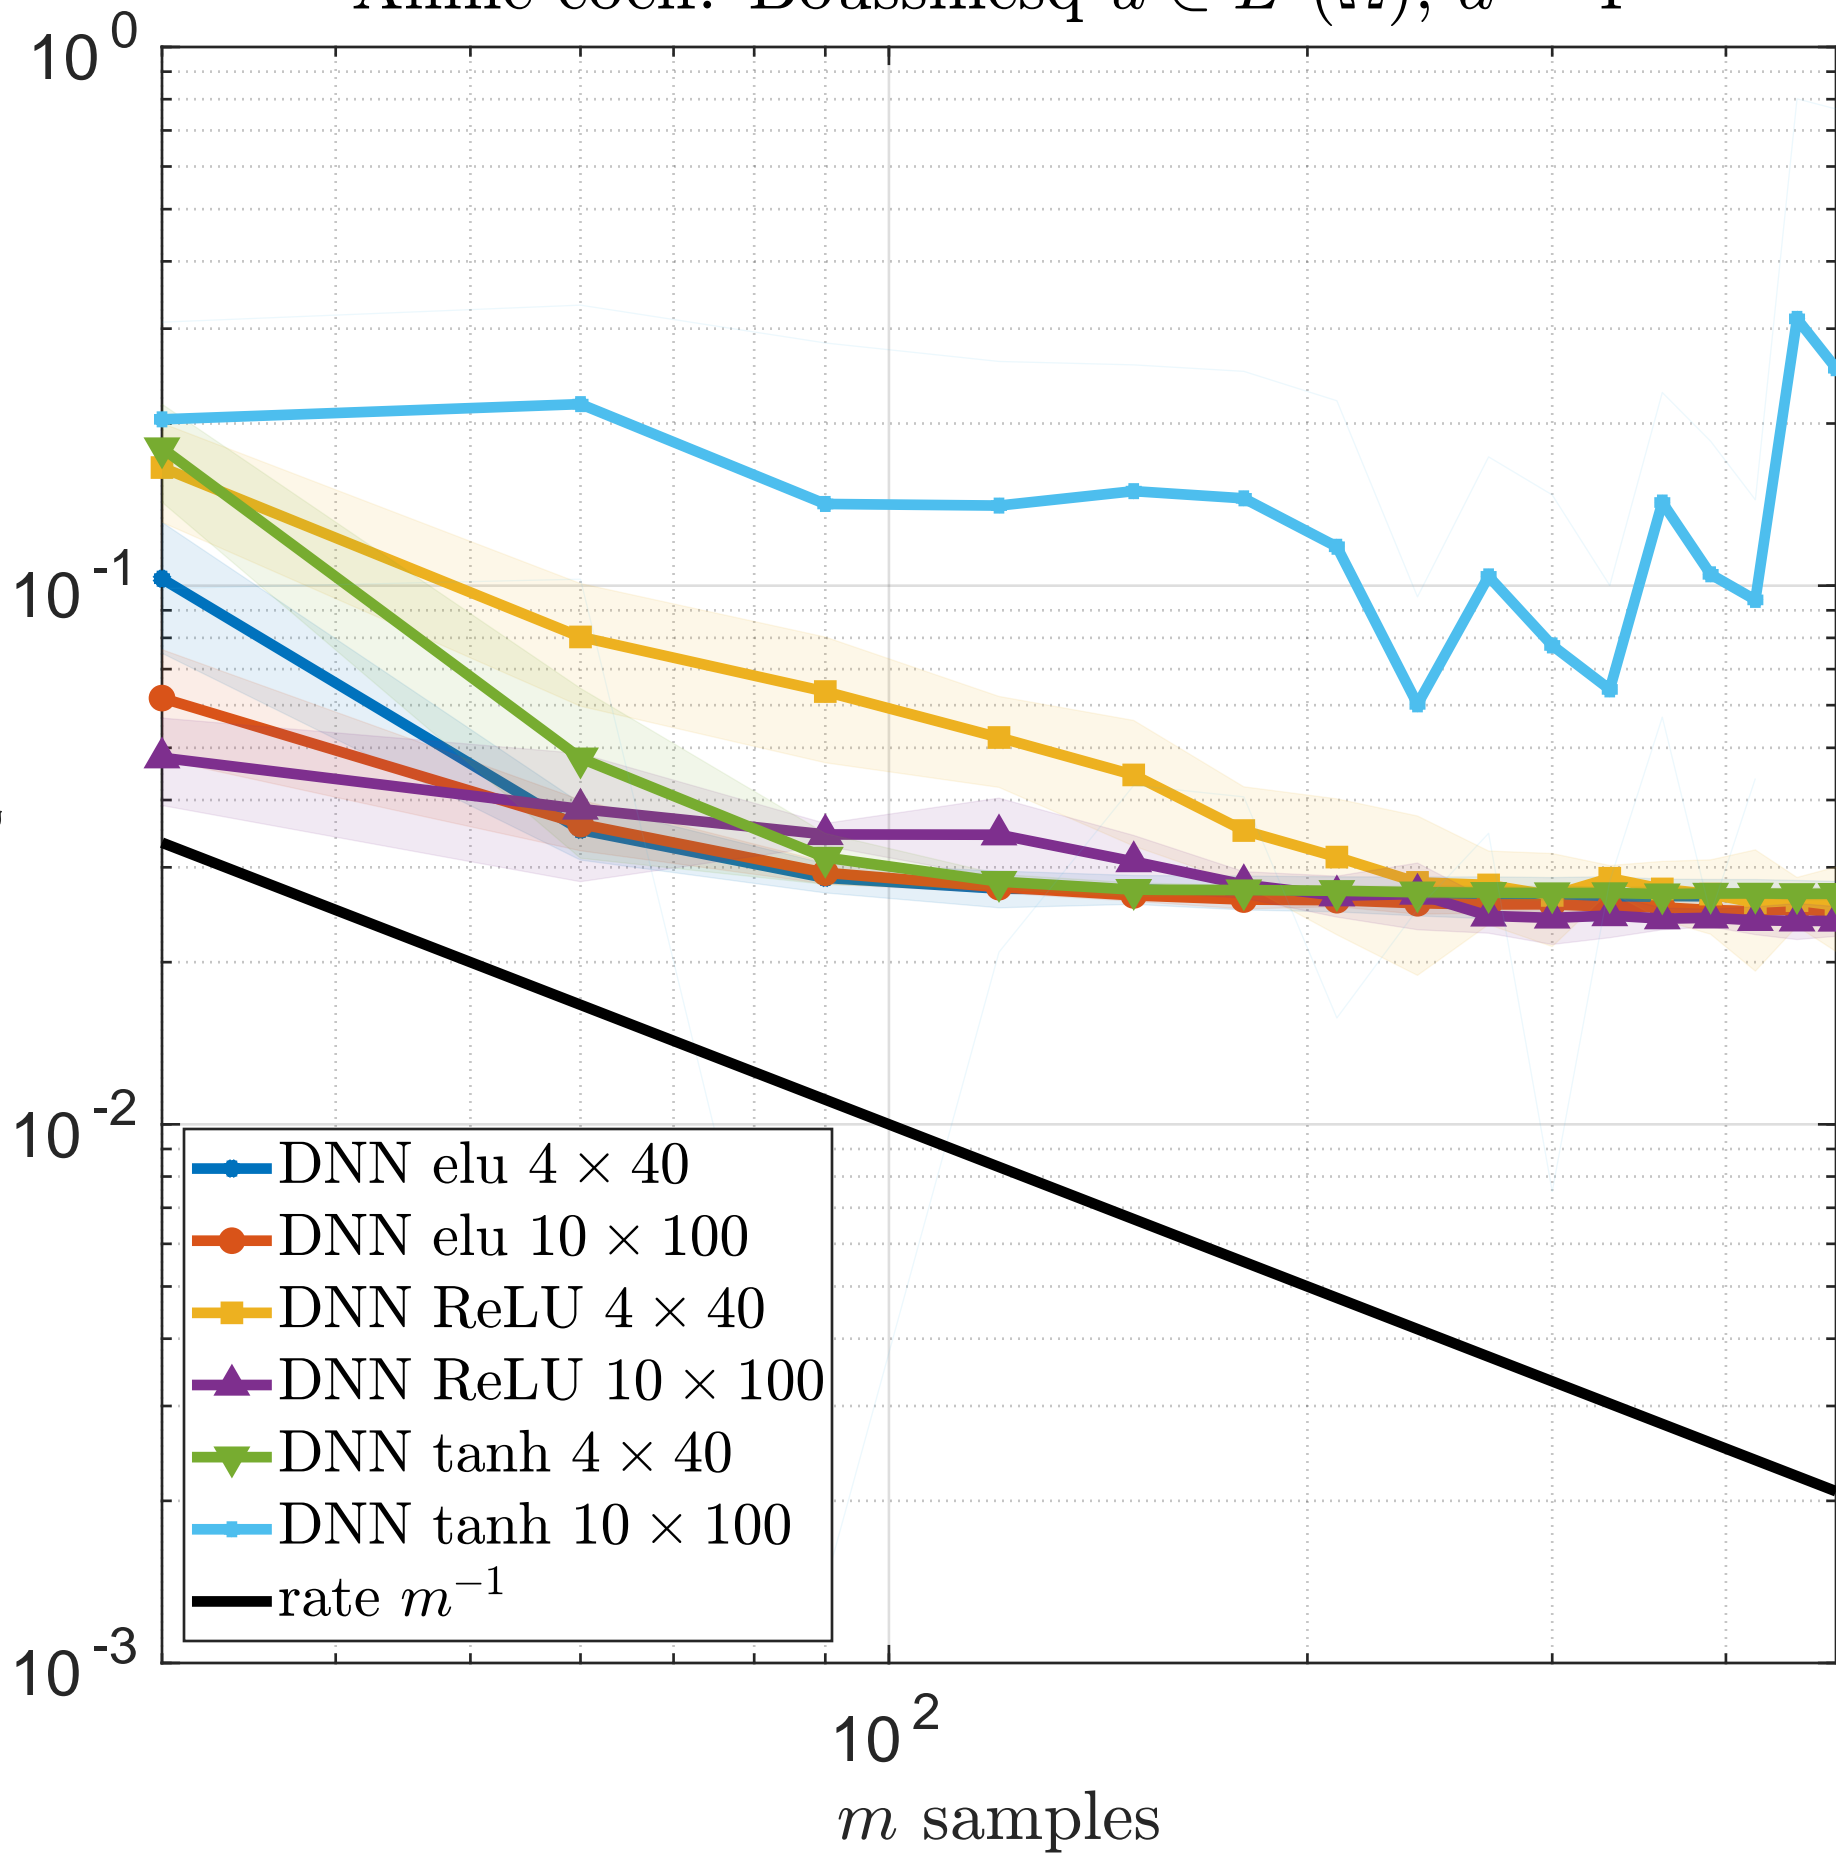

Supplement: supplementary_material [file attachment]

Affine coeff. Poisson  $u \in L^2(\Omega)$ ,  $d = 4$

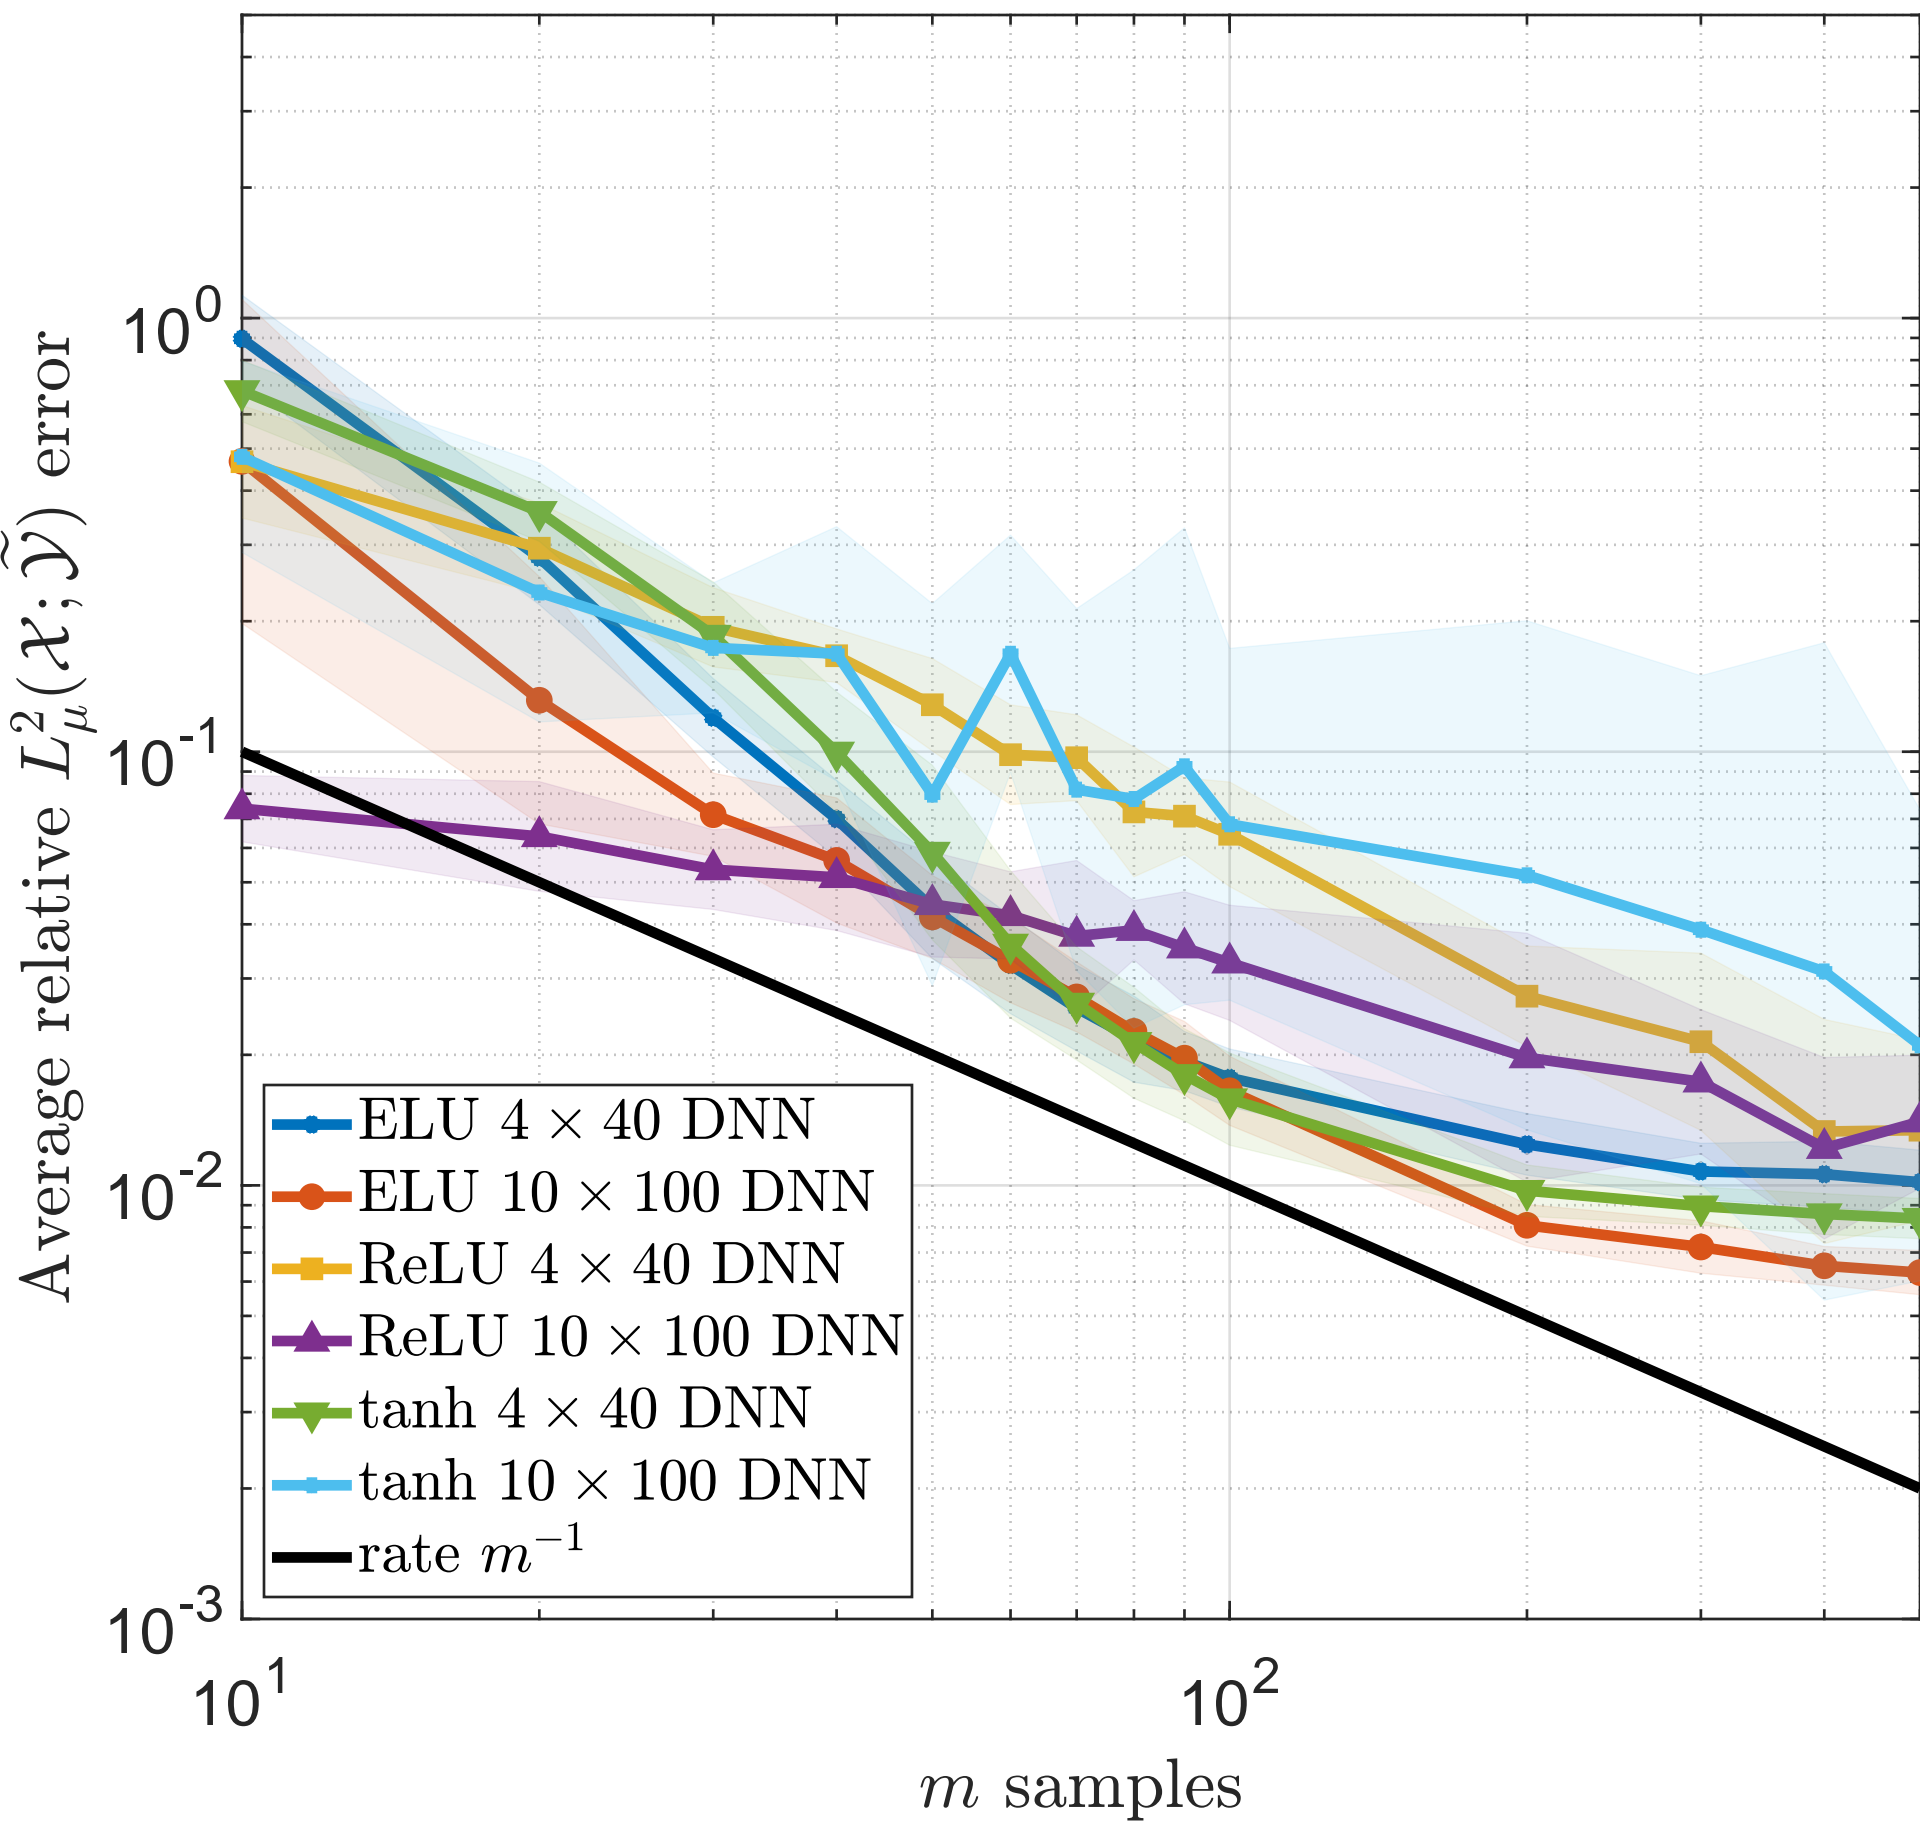

Supplement: supplementary_material [file attachment]

LogKL coeff. Boussinesq  $\mathbf{u} \in \mathbf{L}^4(\Omega)$ ,  $d = 4$

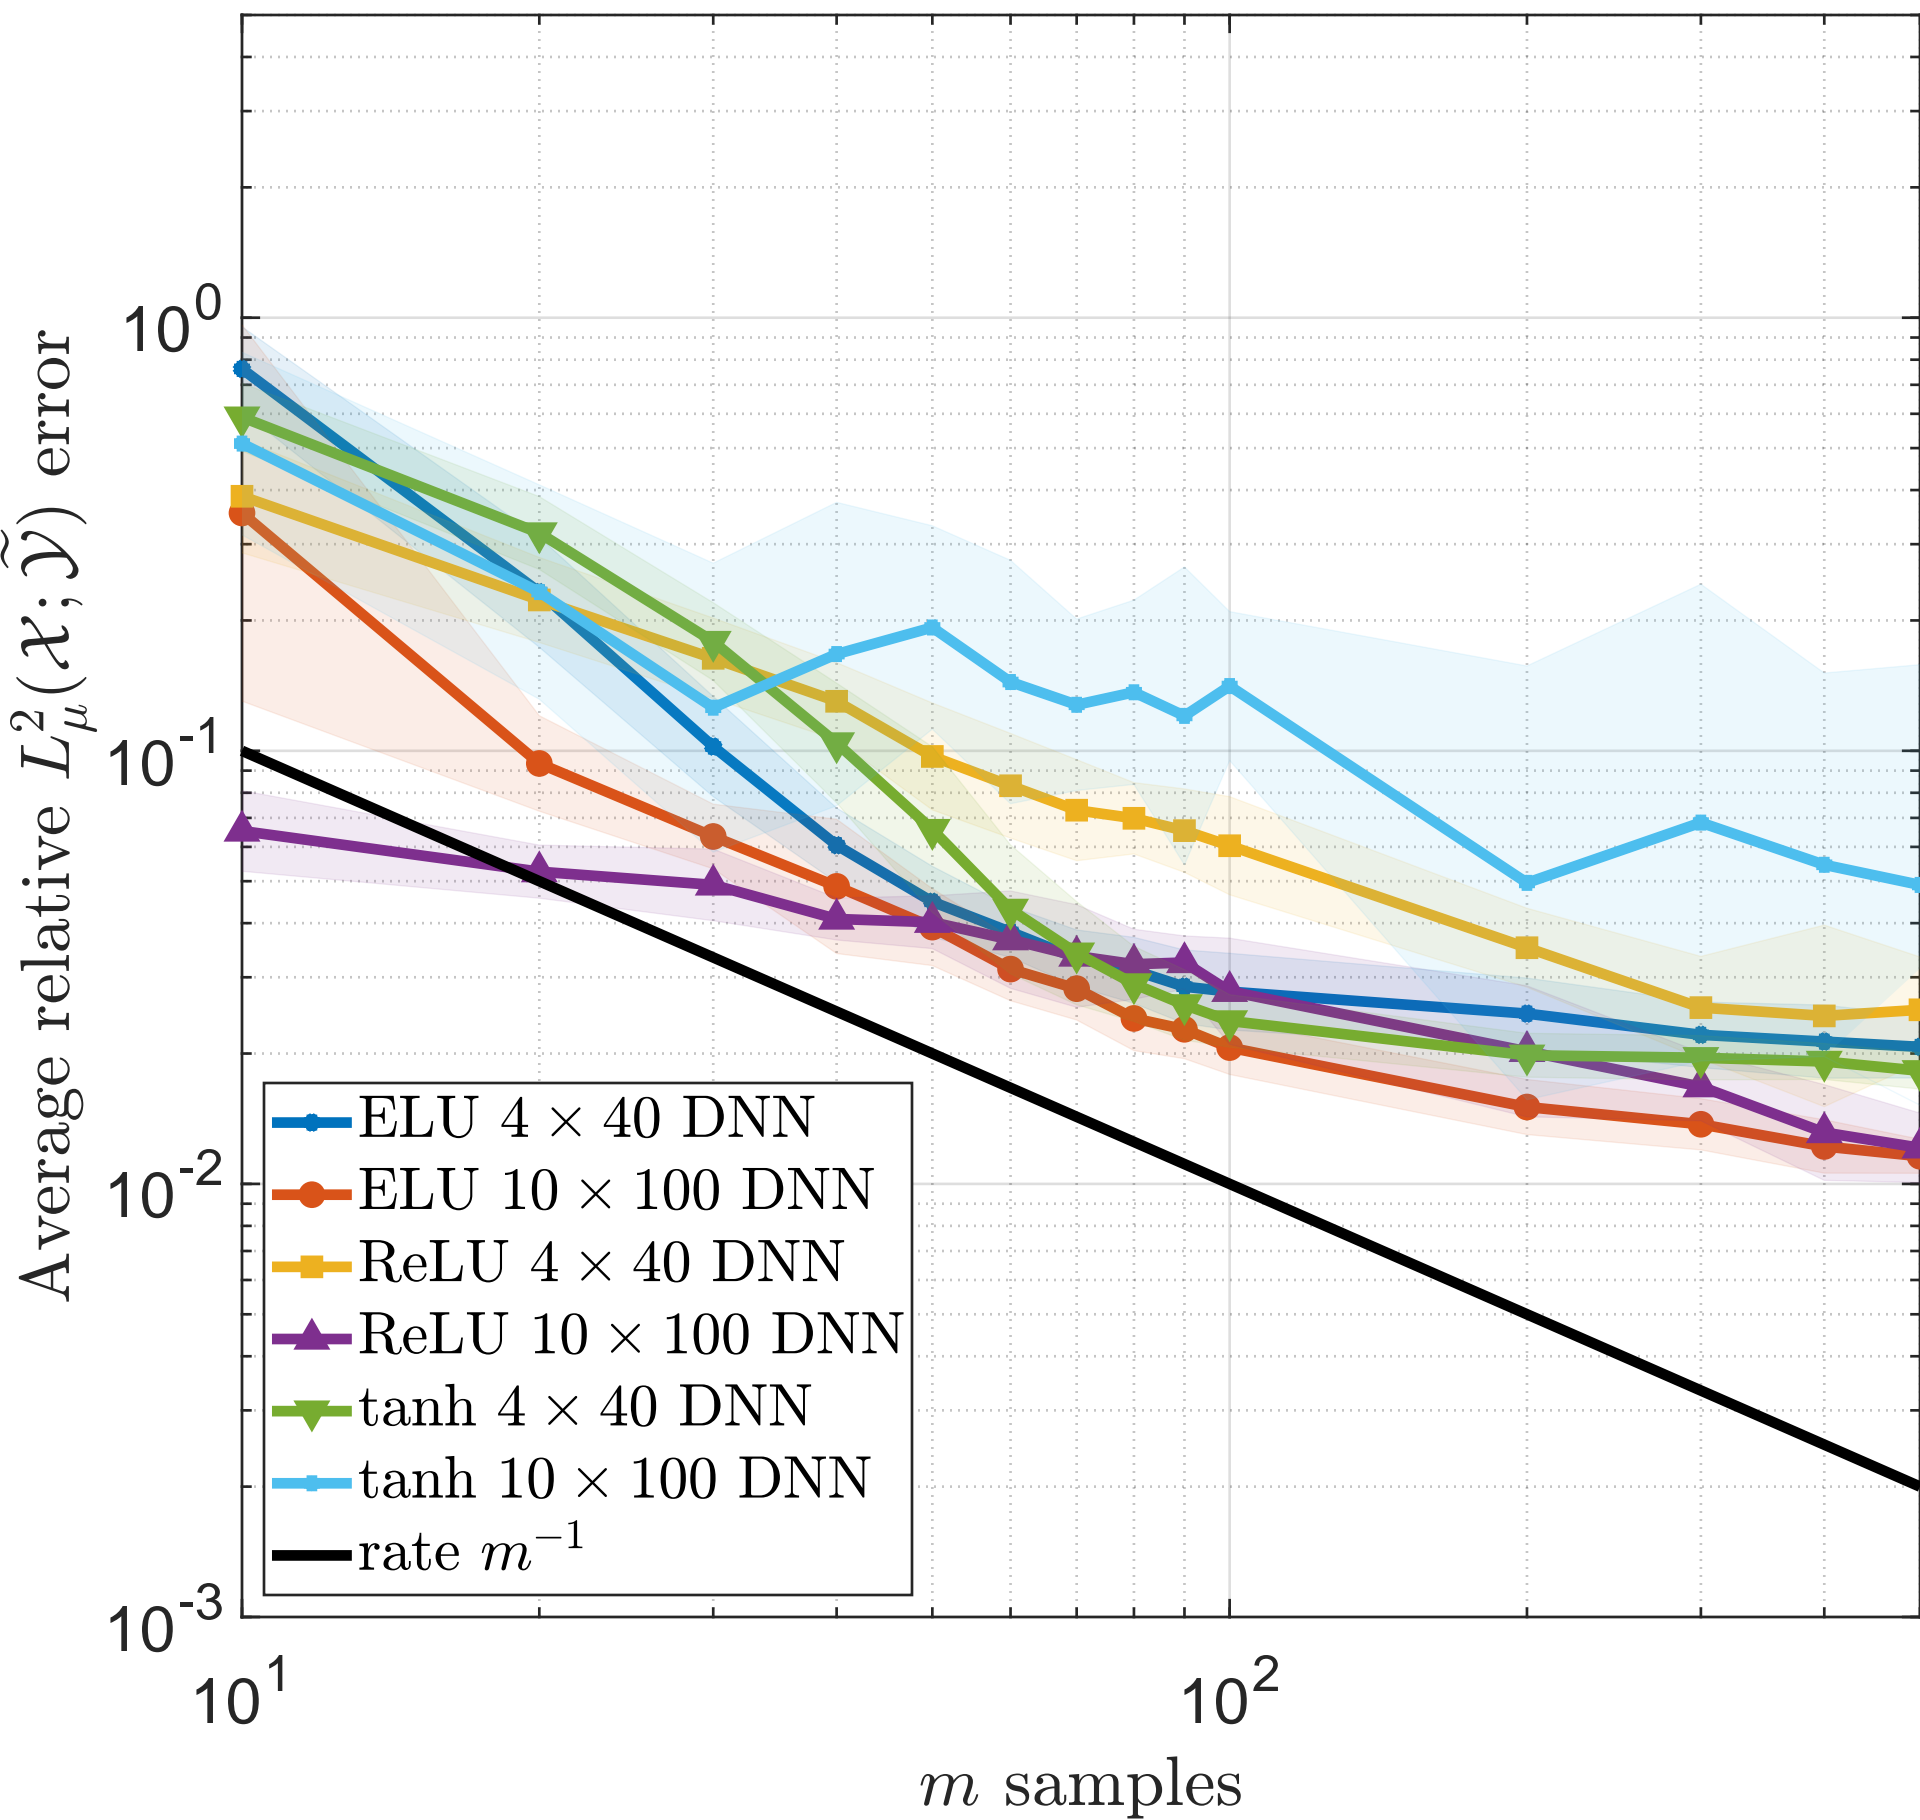

Supplement: supplementary_material [file attachment]

Affine coeff. NSB  $u \in \mathbf{L}^4(\Omega)$ ,  $d = 4$

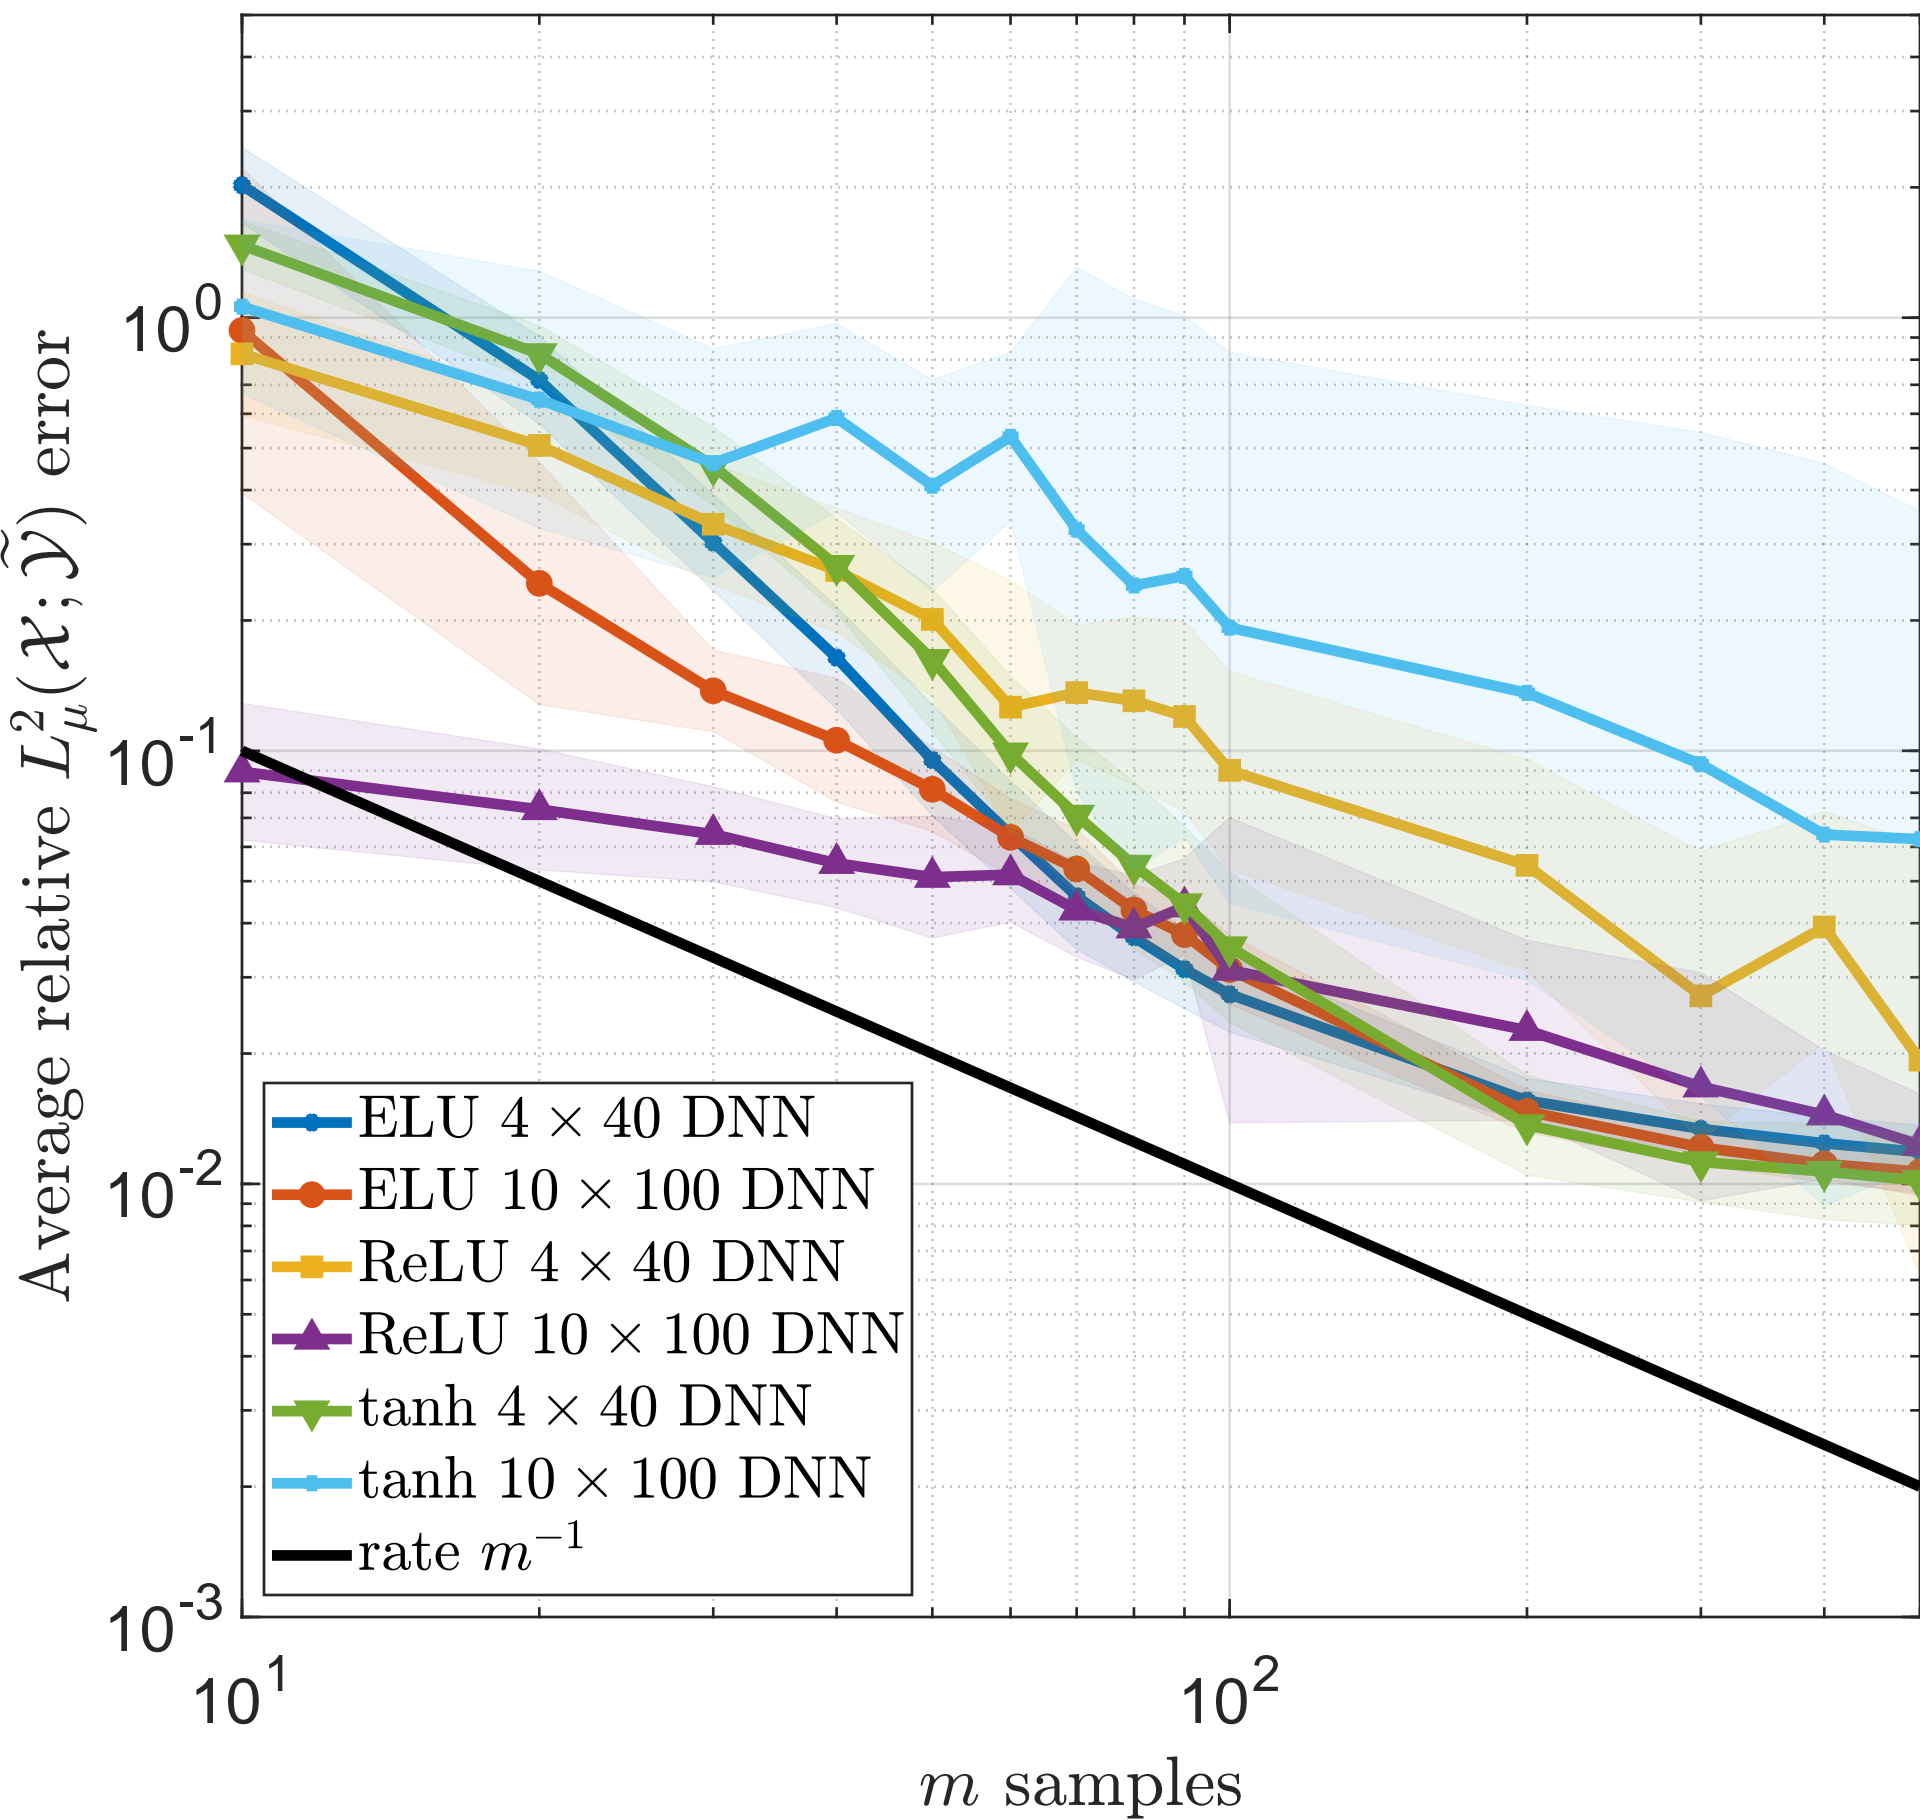

Supplement: supplementary_material [file attachment]

Affine coeff. Poisson  $u \in L^2(\Omega)$ ,  $d = 8$

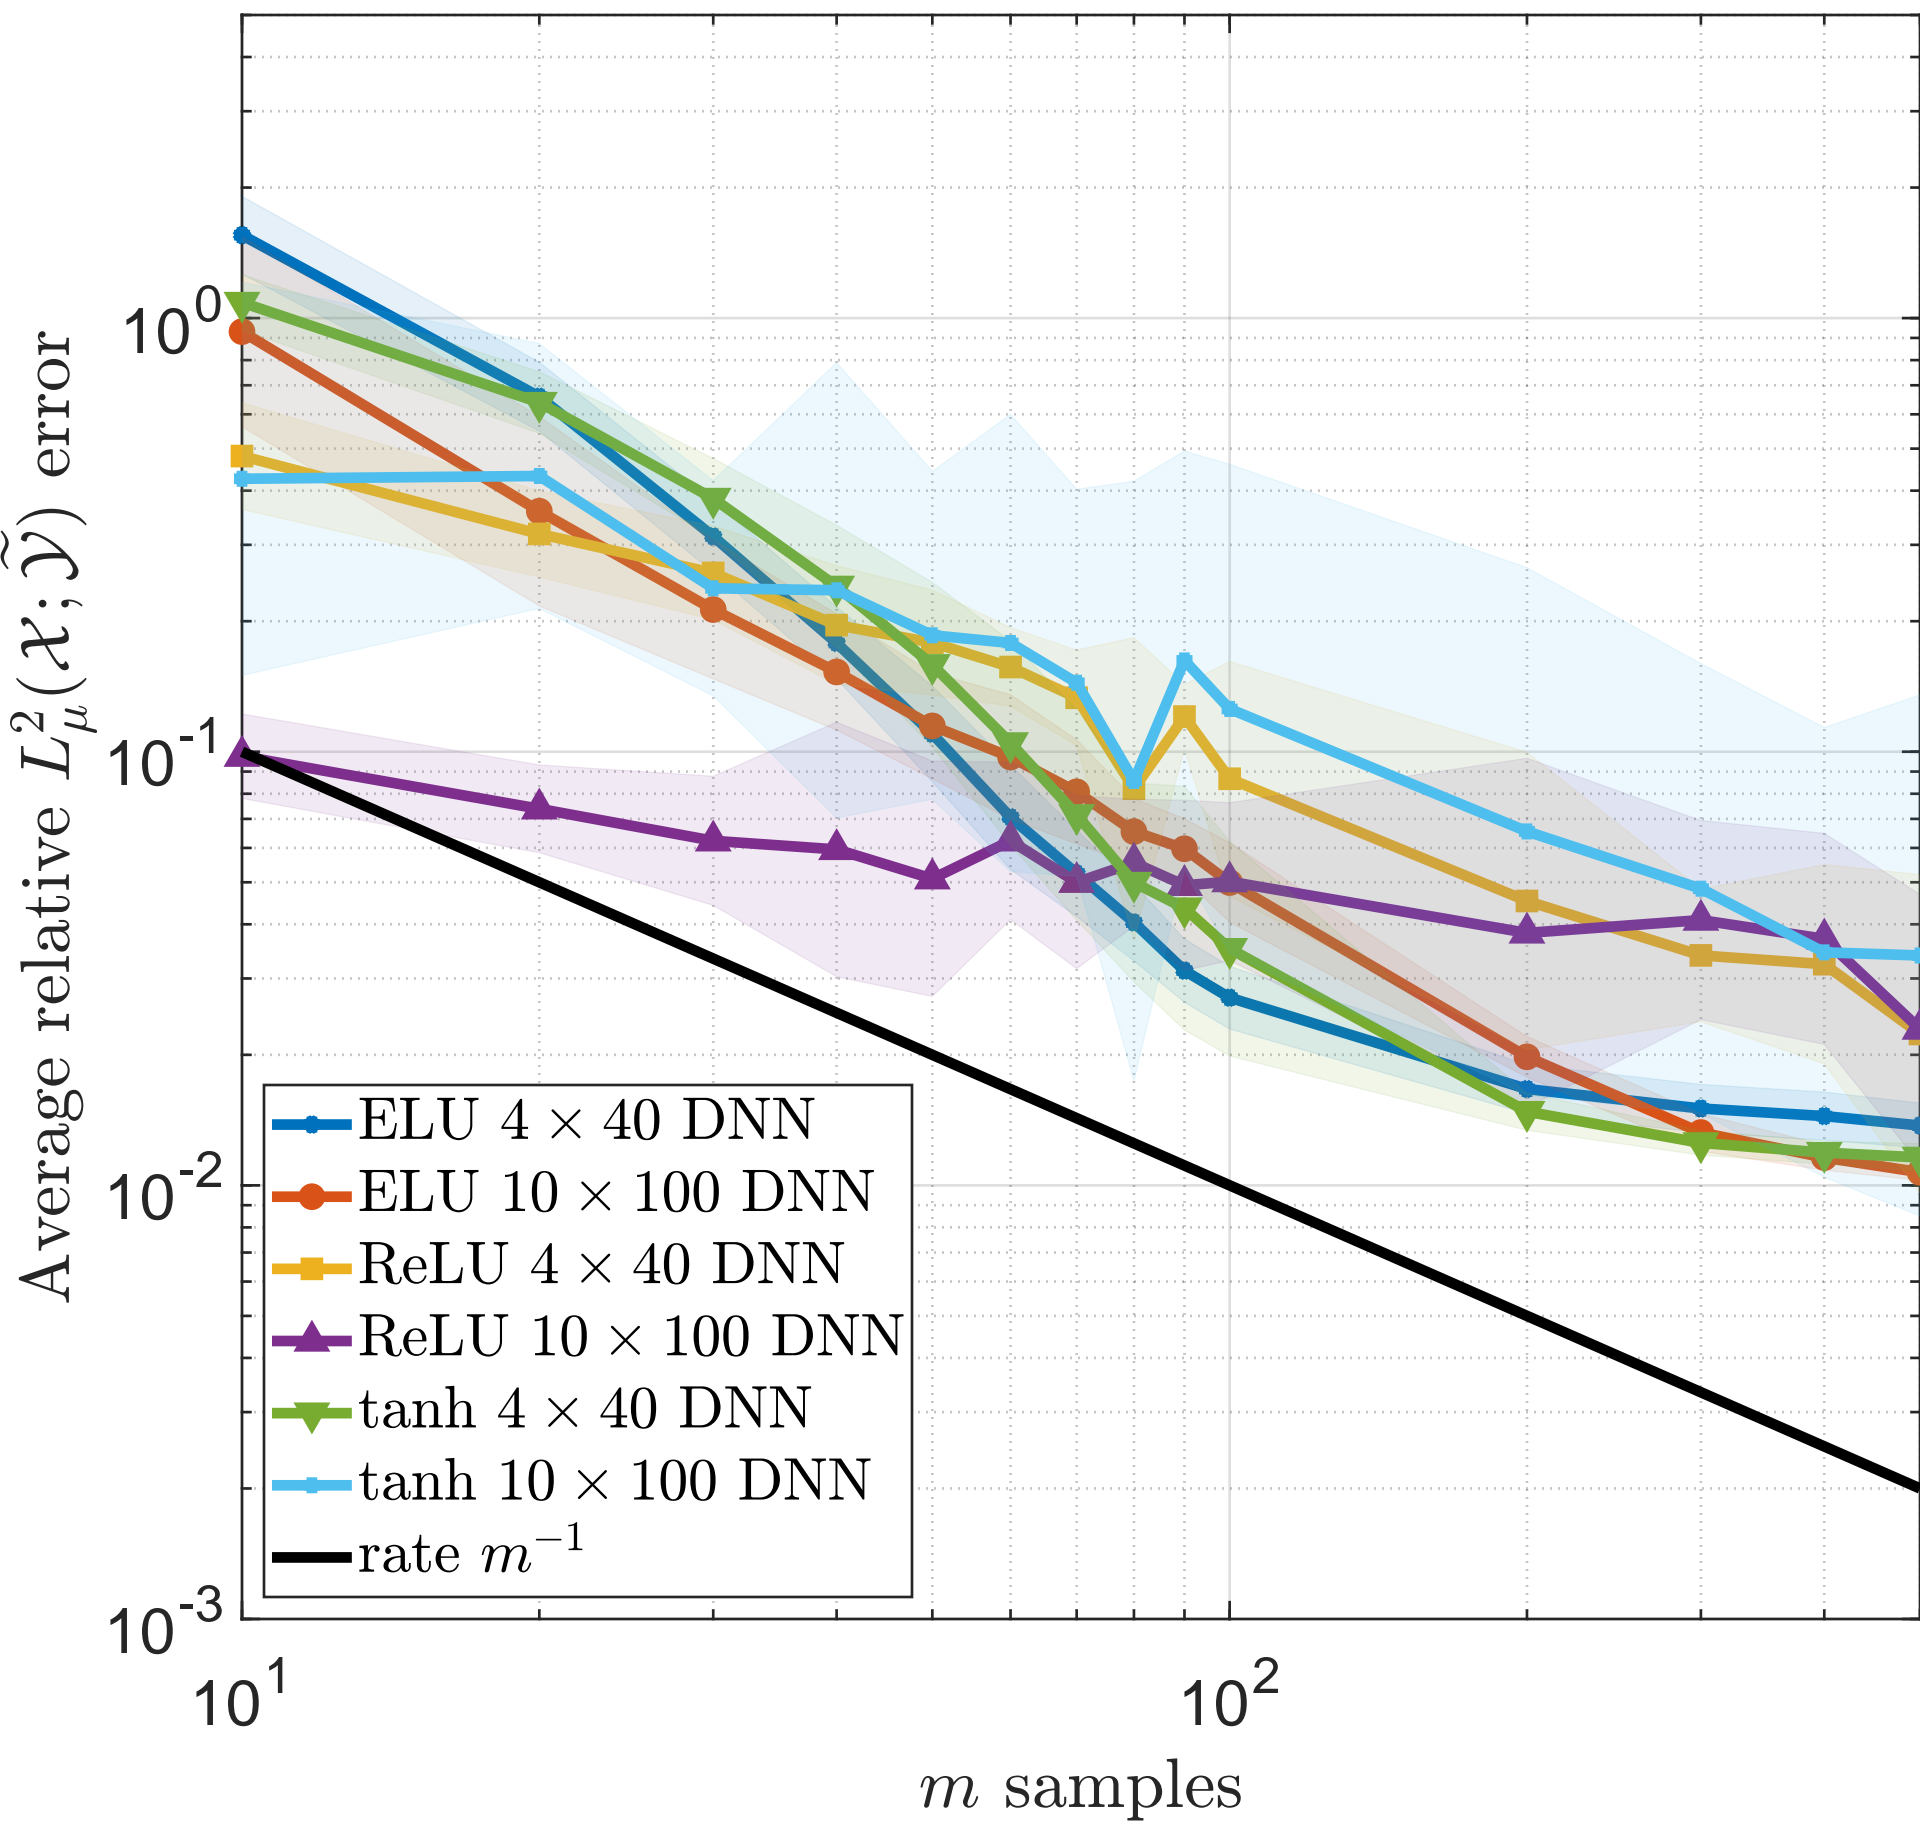

Supplement: supplementary_material [file attachment]

Affine coeff. Boussinesq  $\varphi \in L^4(\Omega)$ ,  $d = 4$

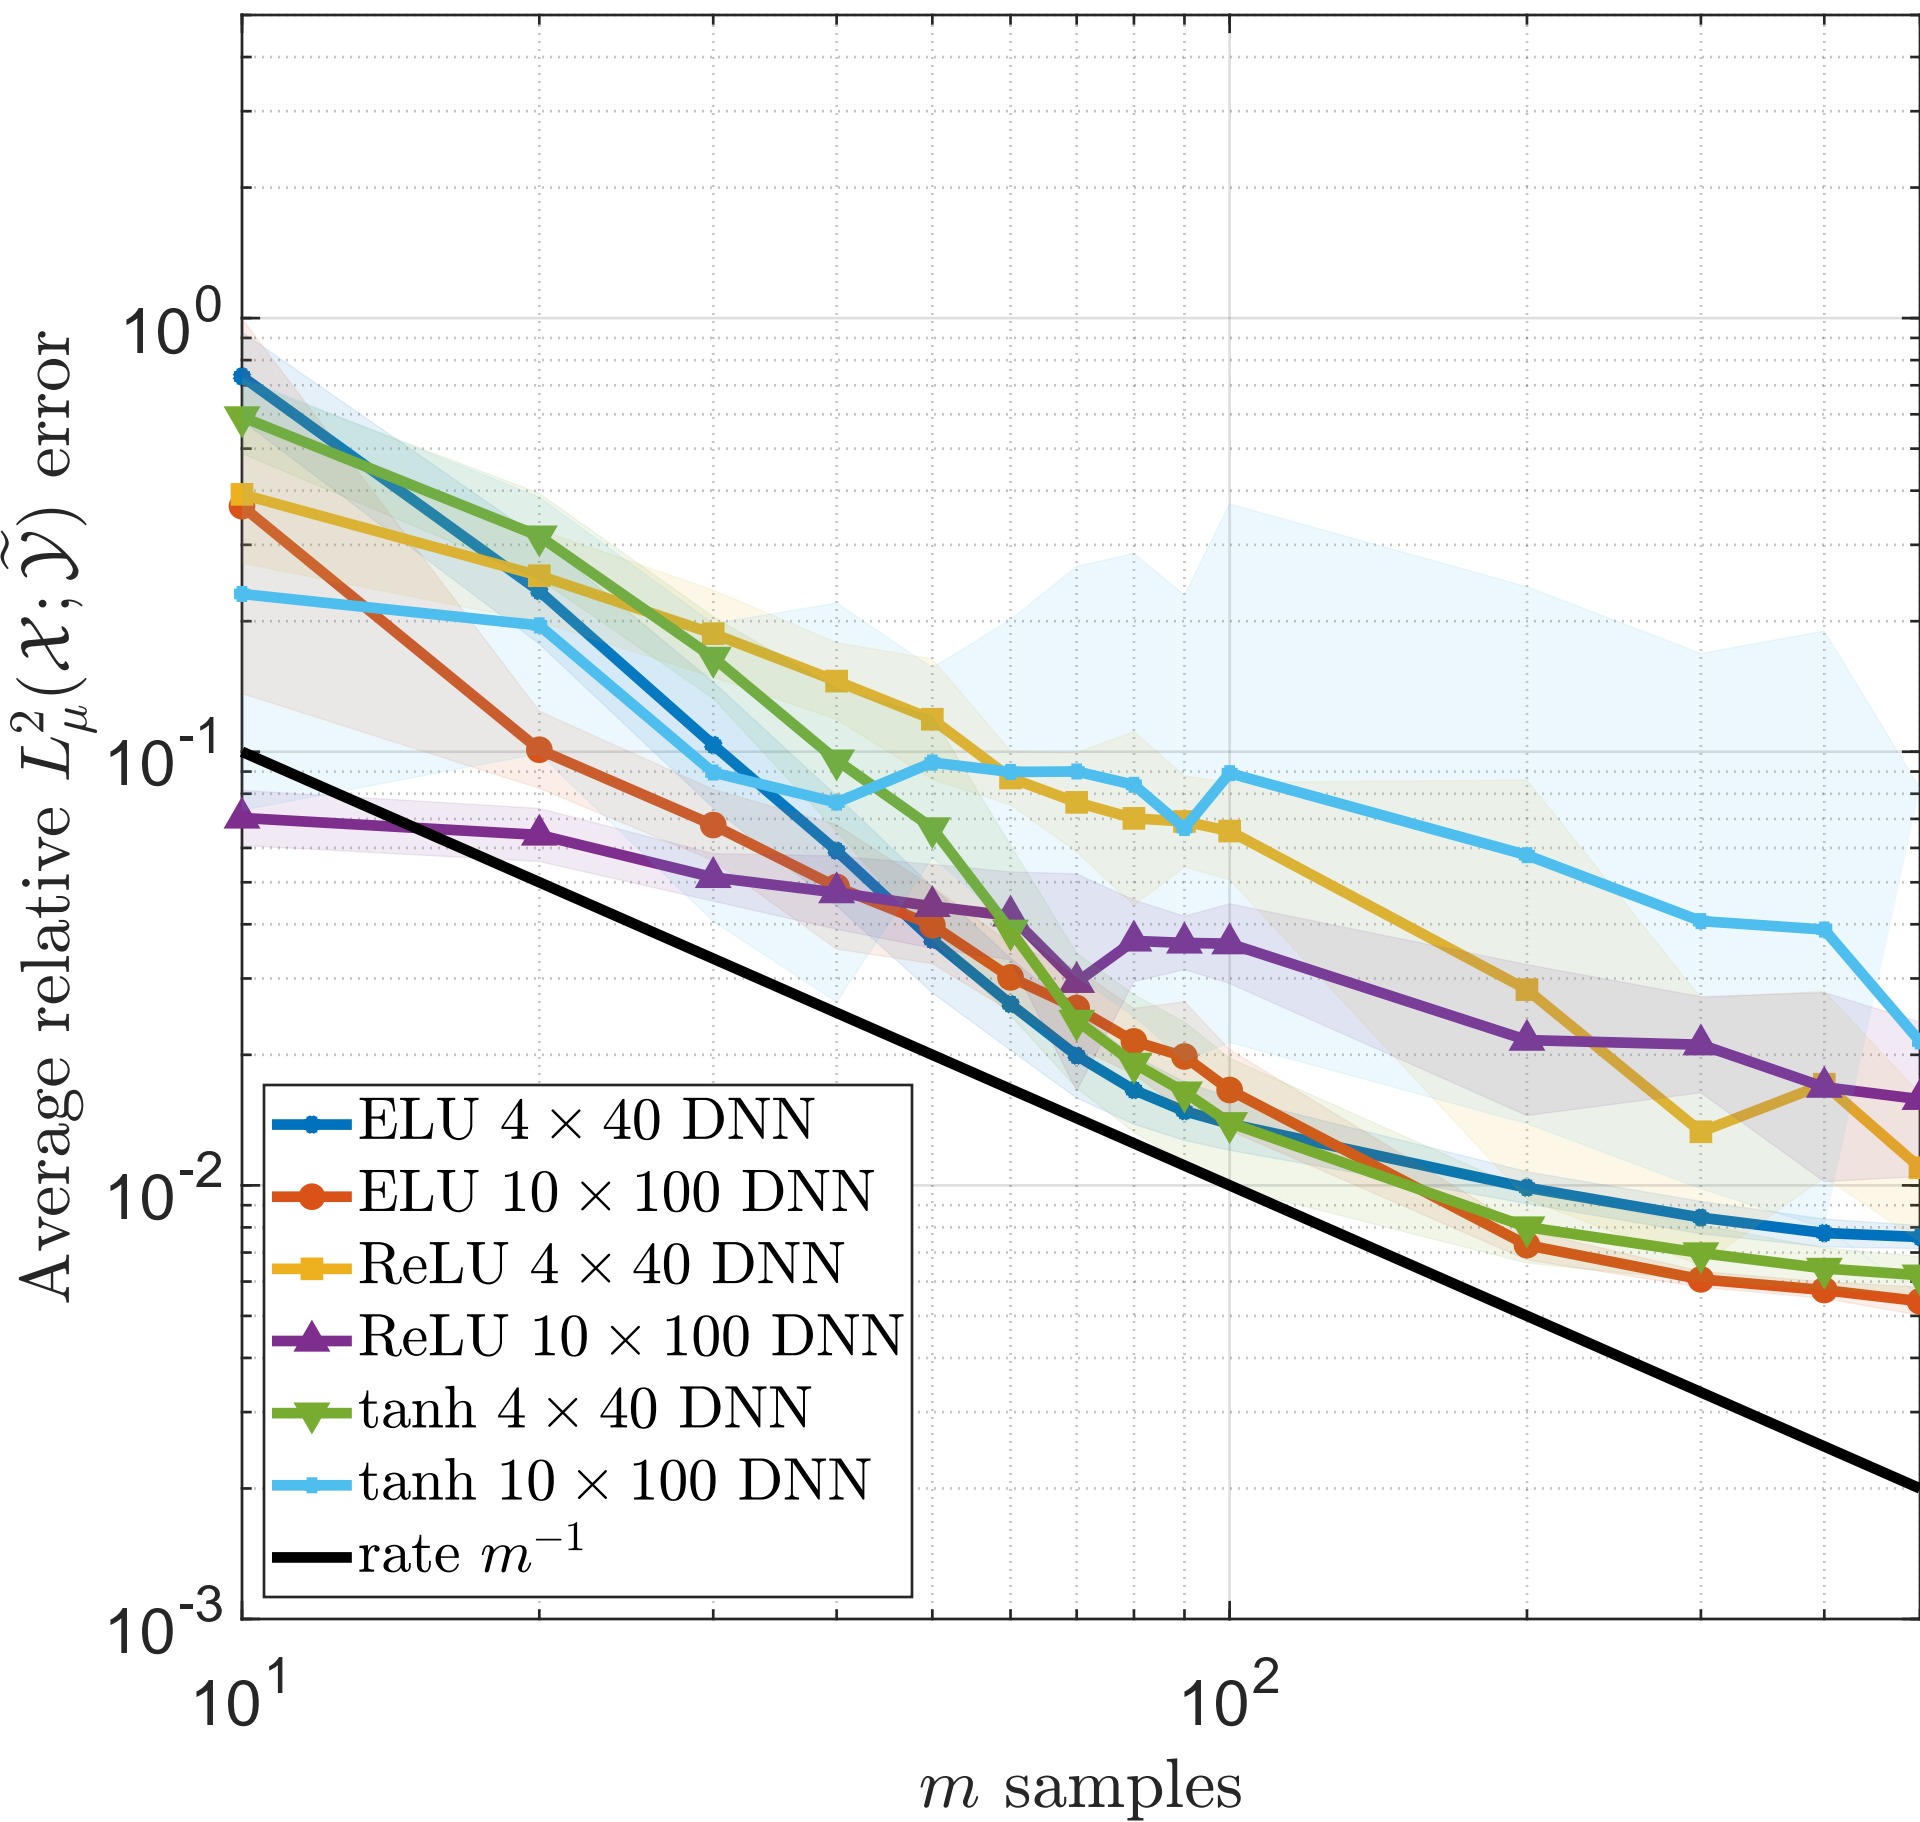

Supplement: supplementary_material [file attachment]

Affine coeff. NSB  $p \in L^2(\Omega)$ ,  $d = 8$

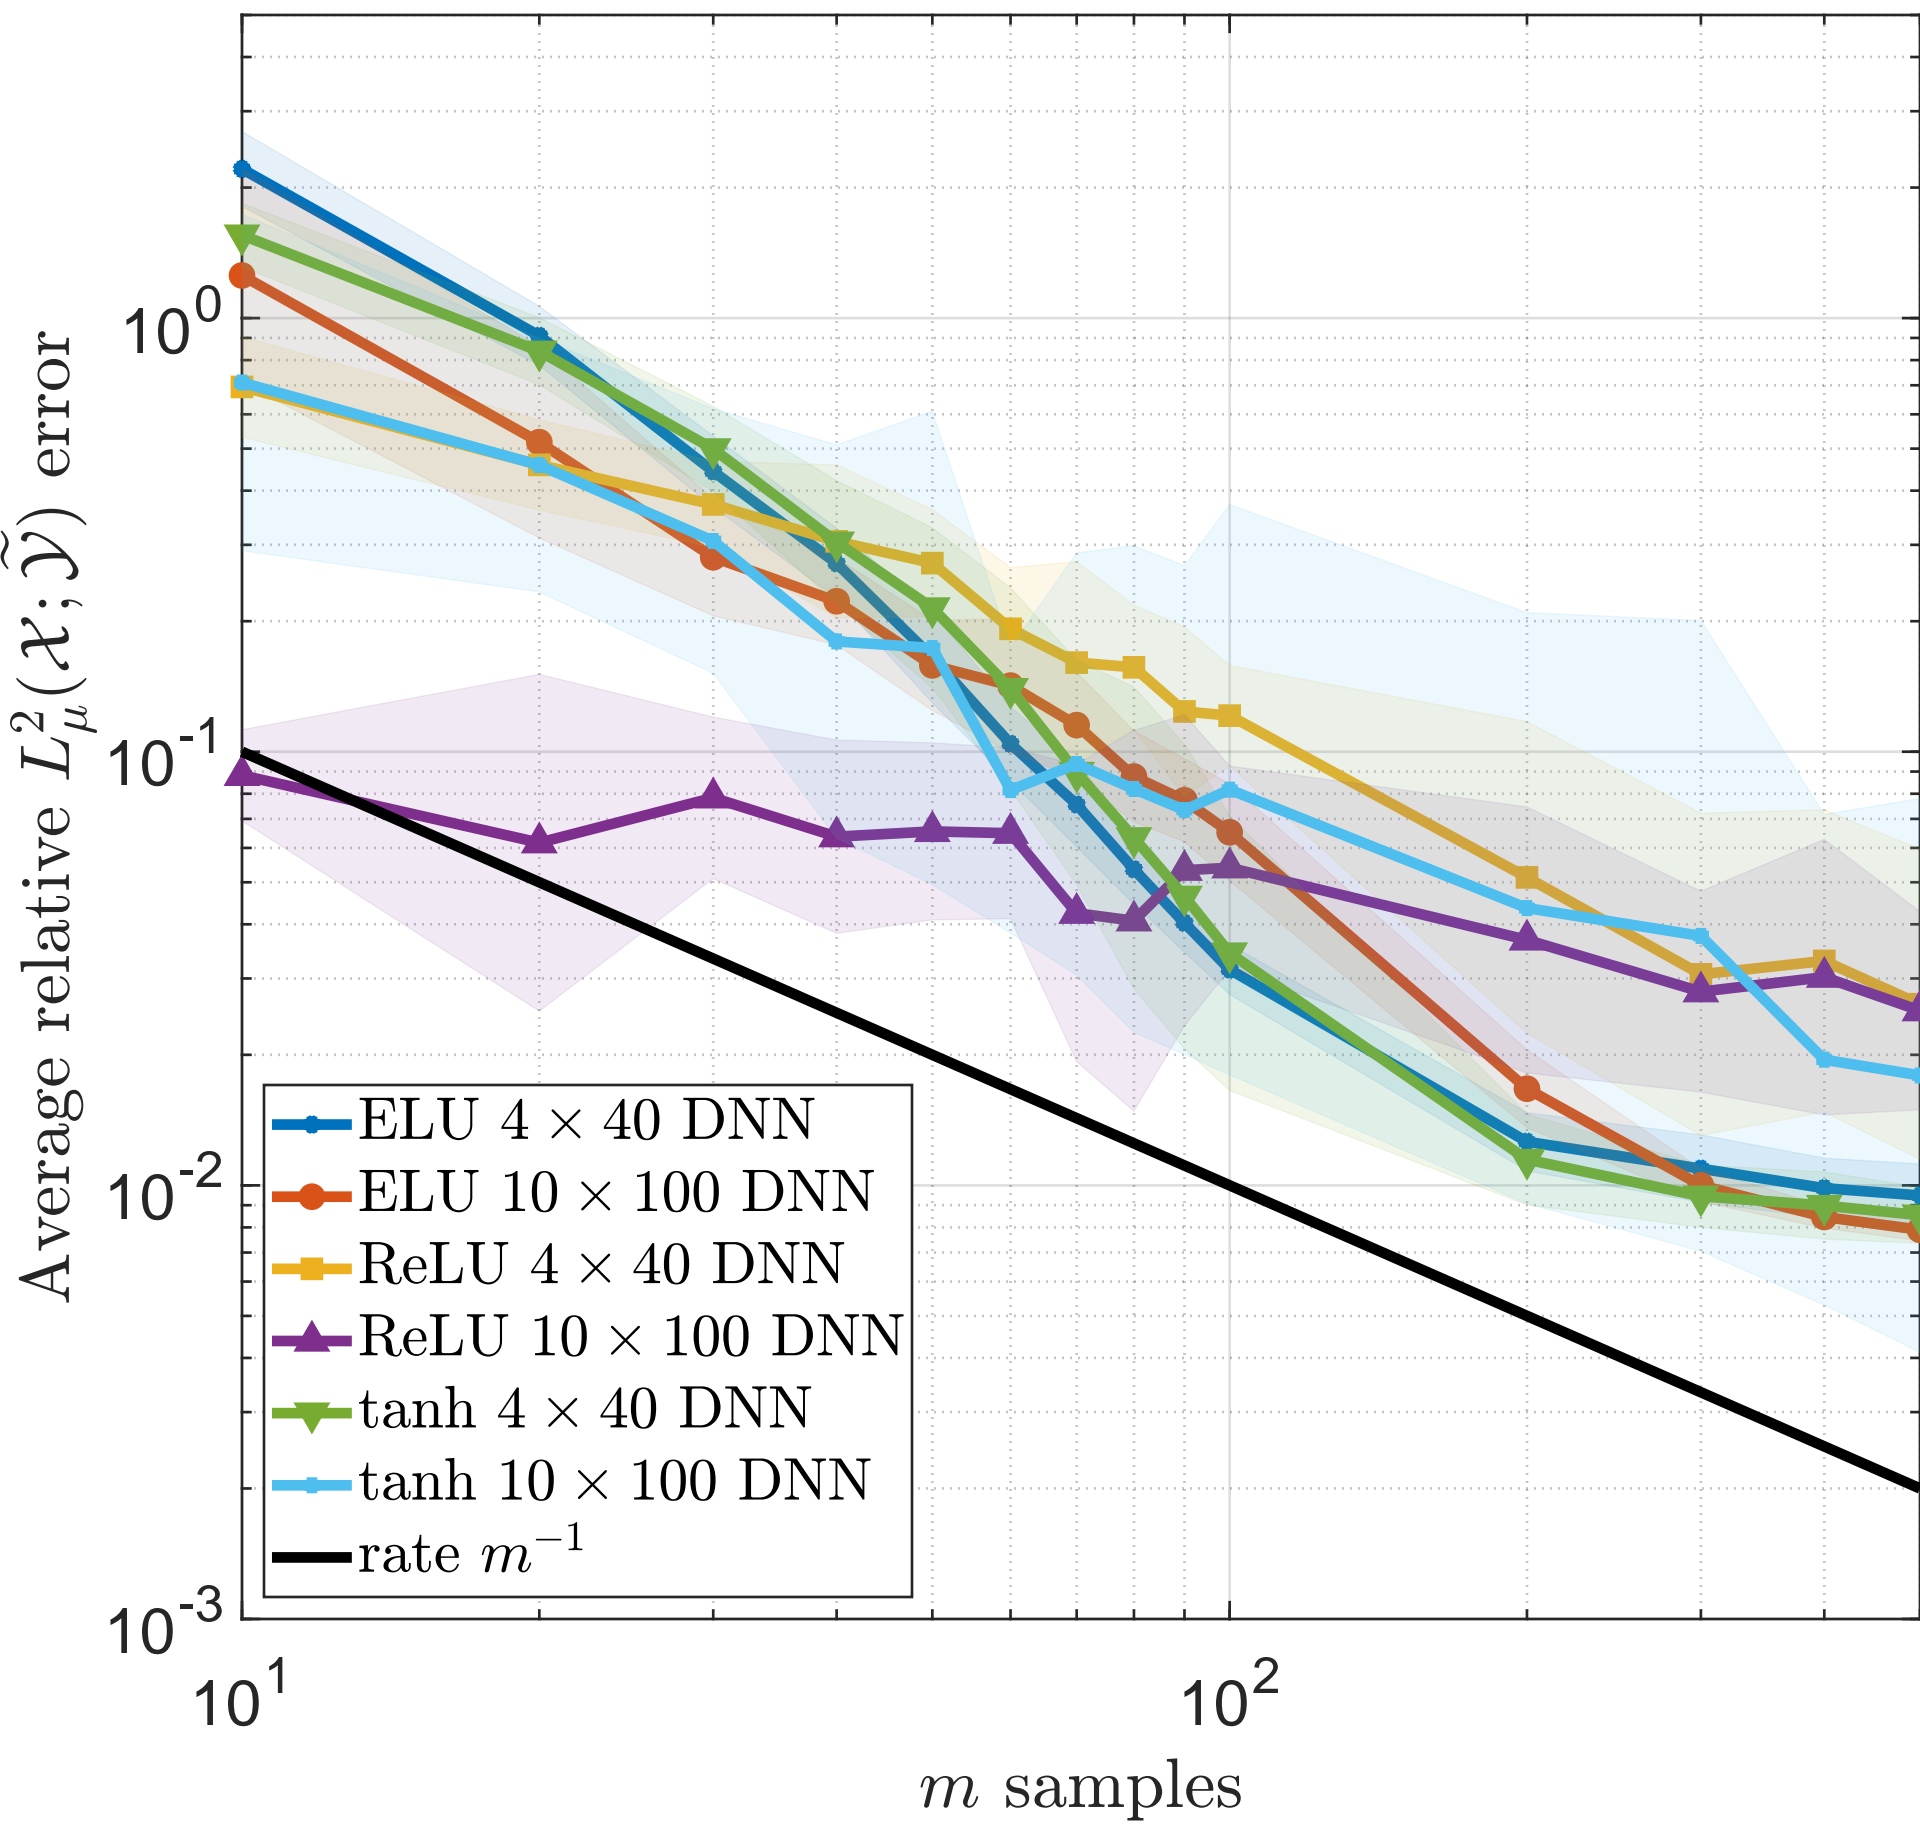

Supplement: supplementary_material [file attachment]

LogKL coeff. Poisson  $u \in L^2(\Omega)$ ,  $d = 8$

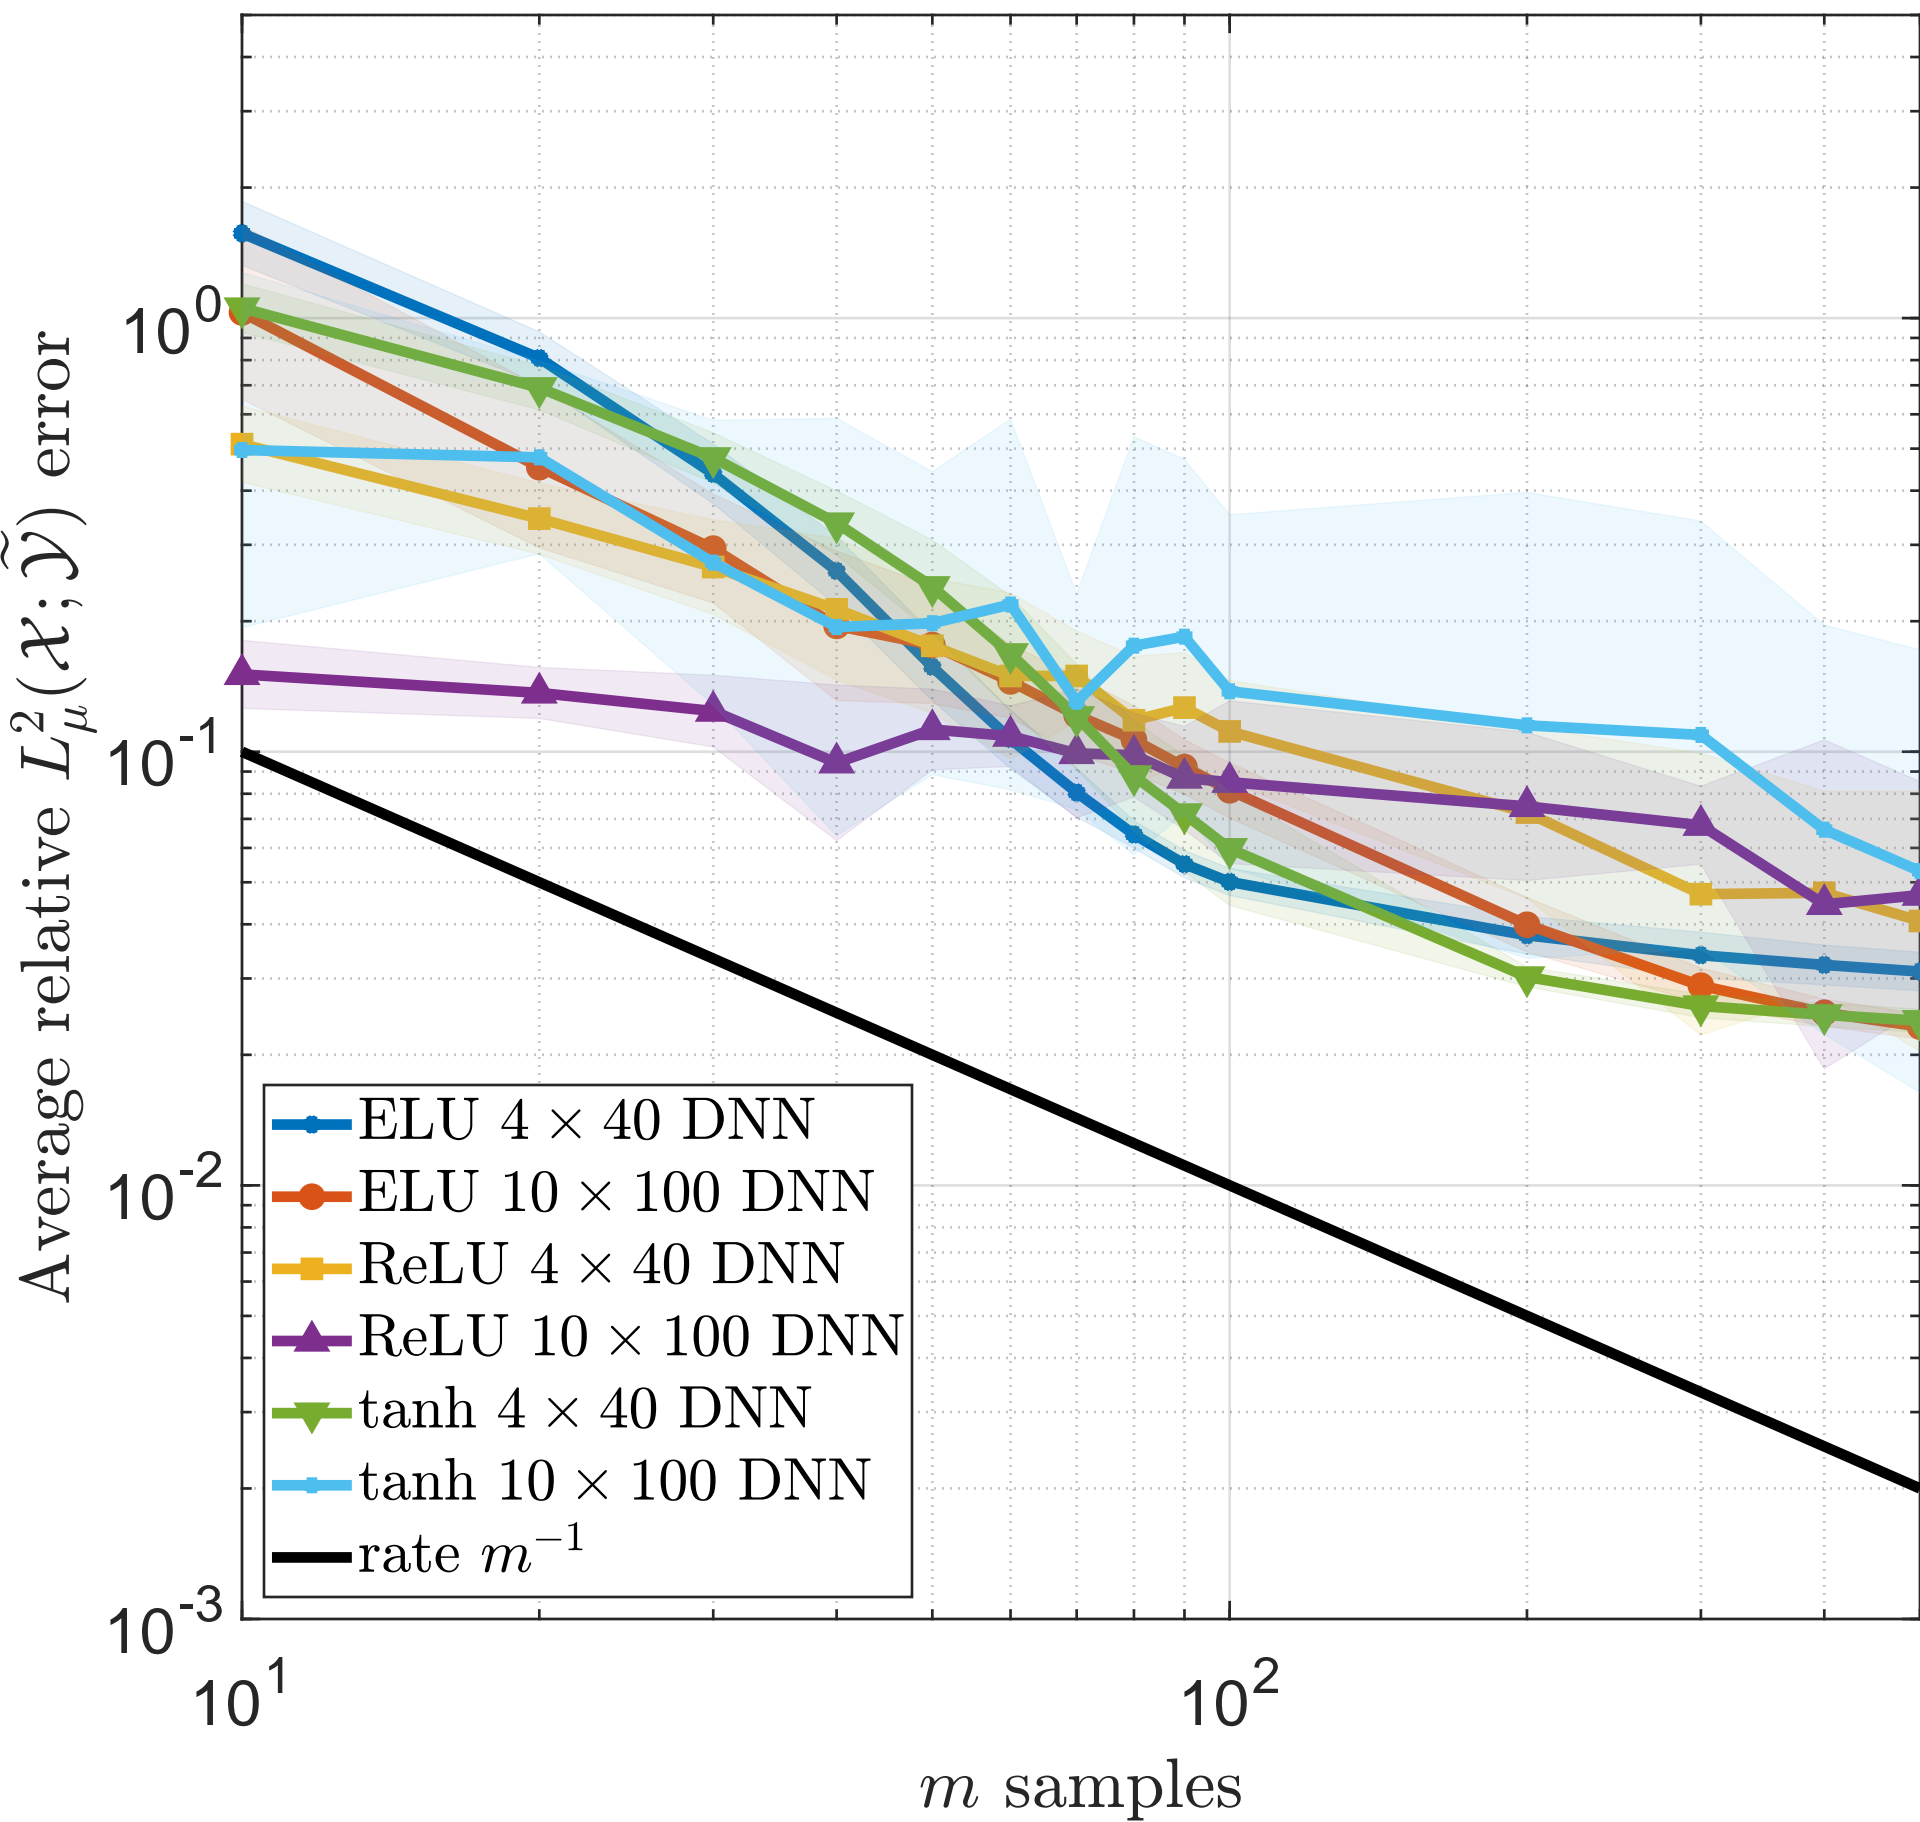

Supplement: supplementary_material [file attachment]

Affine coeff. Boussinesq  $u \in \mathbf{L}^4(\Omega)$ ,  $d = 8$

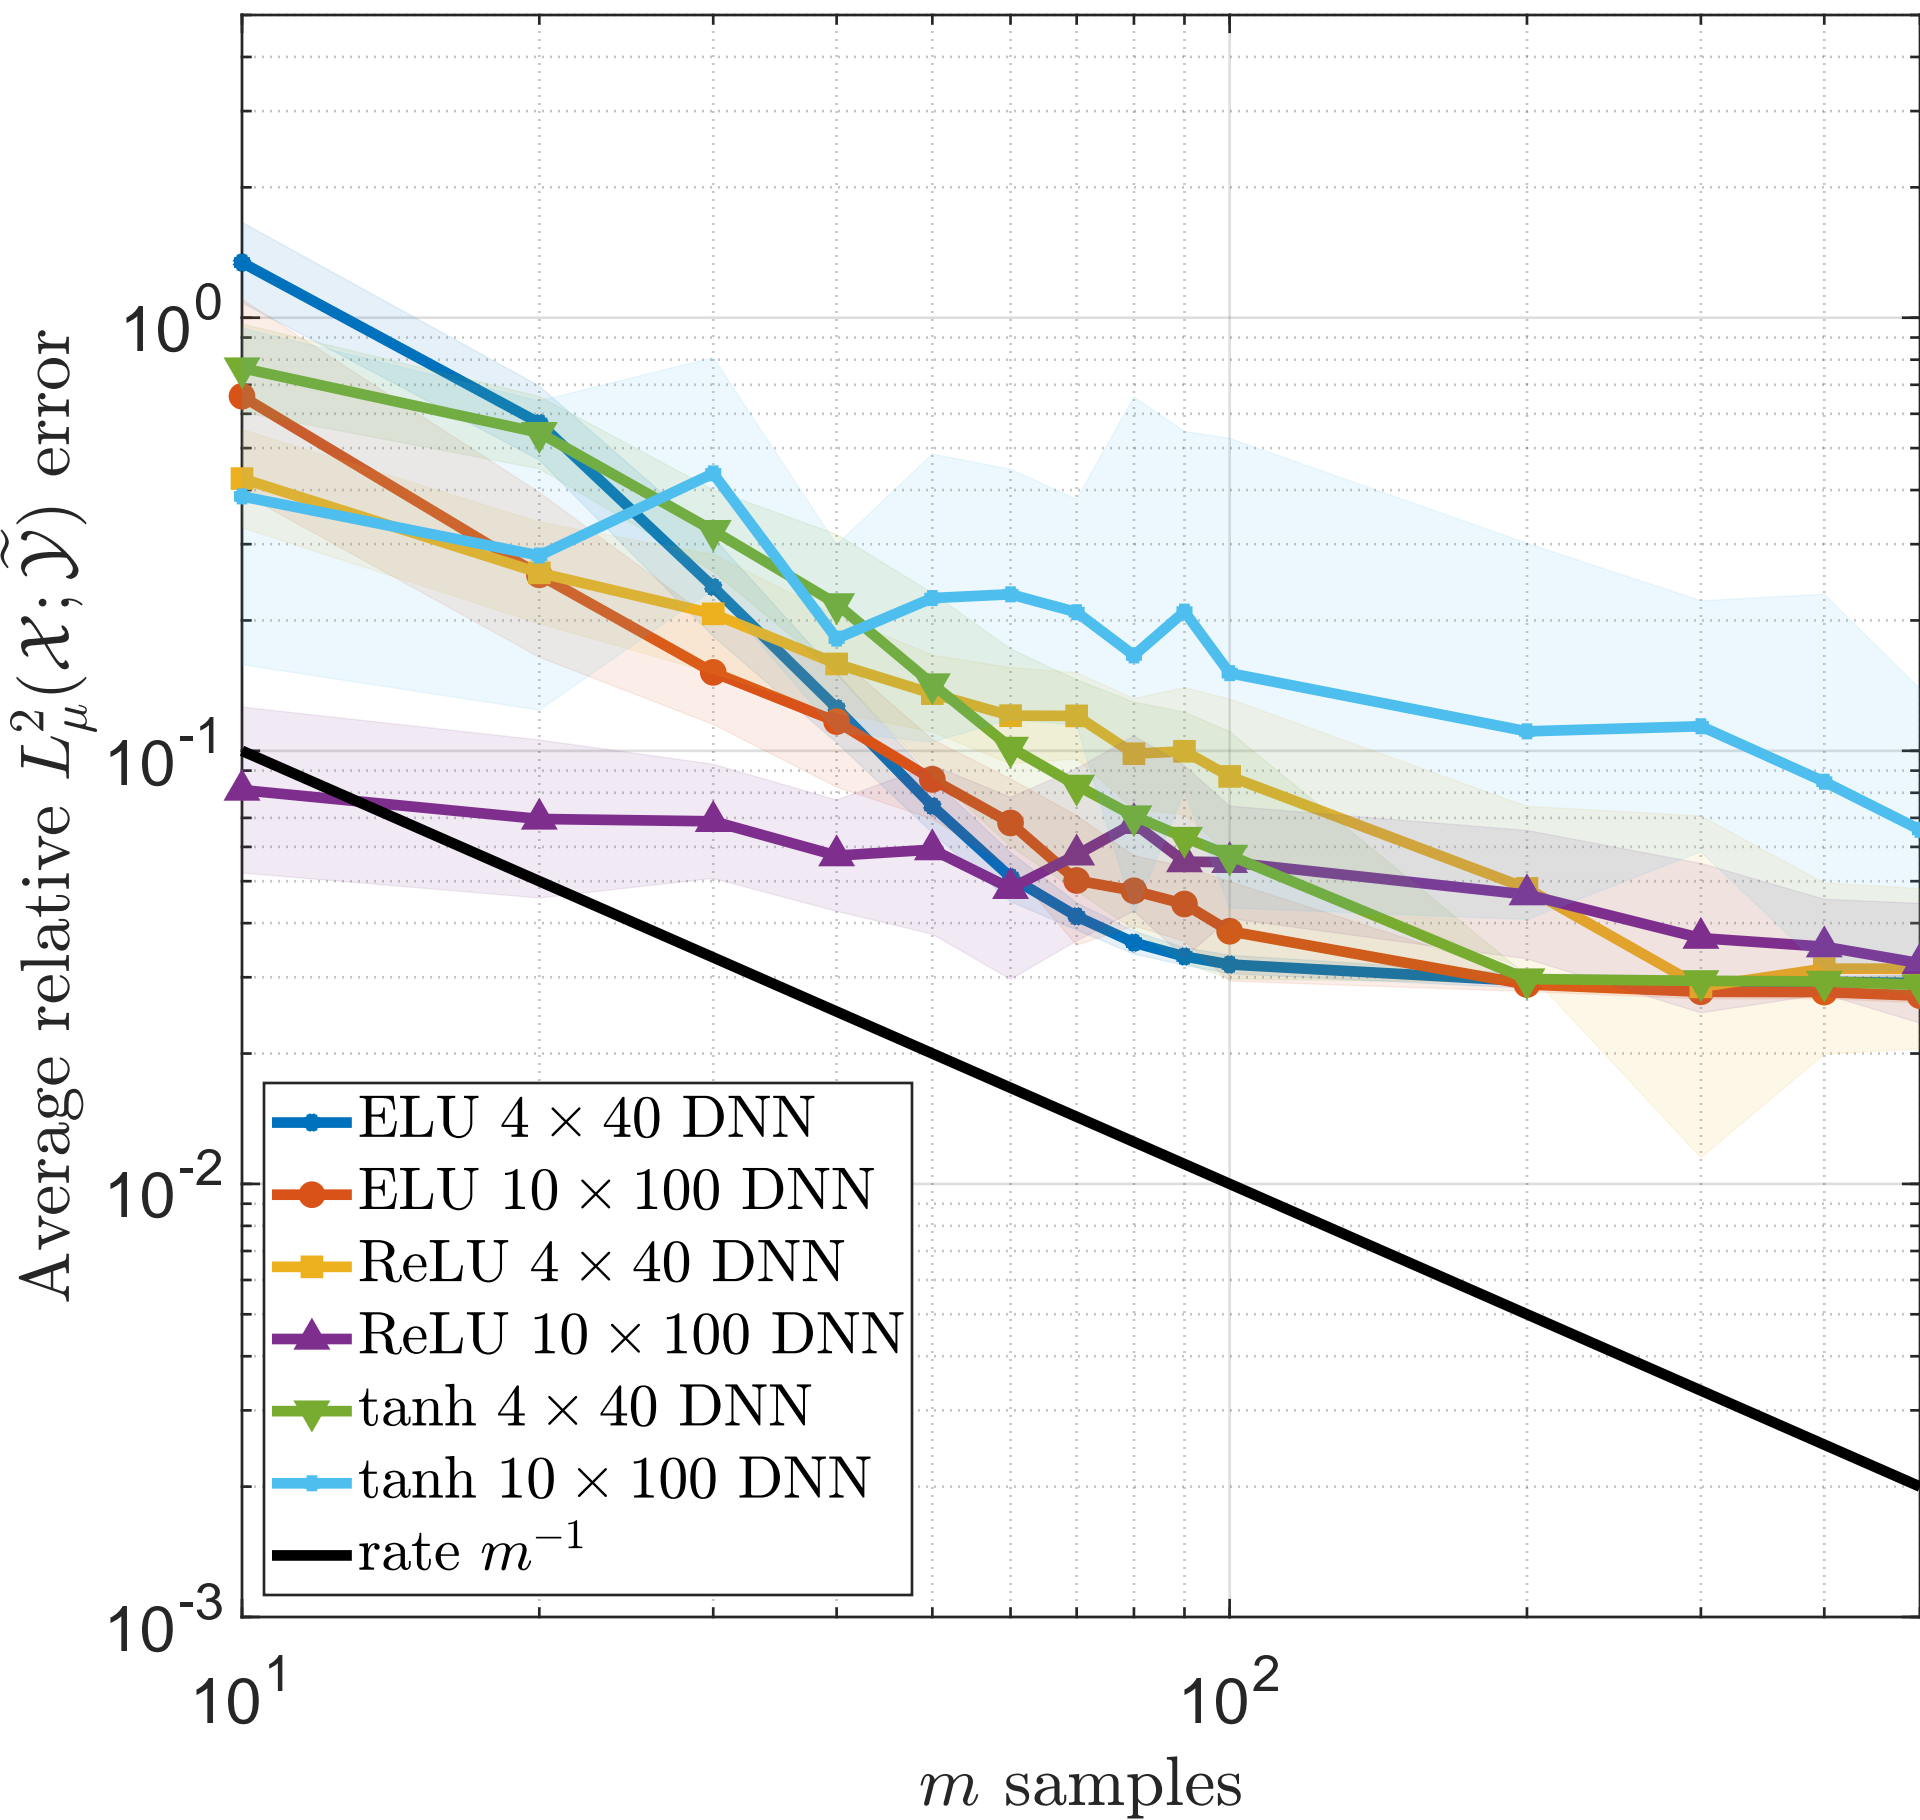

Supplement: supplementary_material [file attachment]

LogKL coeff. NSB  $p \in L^2(\Omega)$ ,  $d = 4$

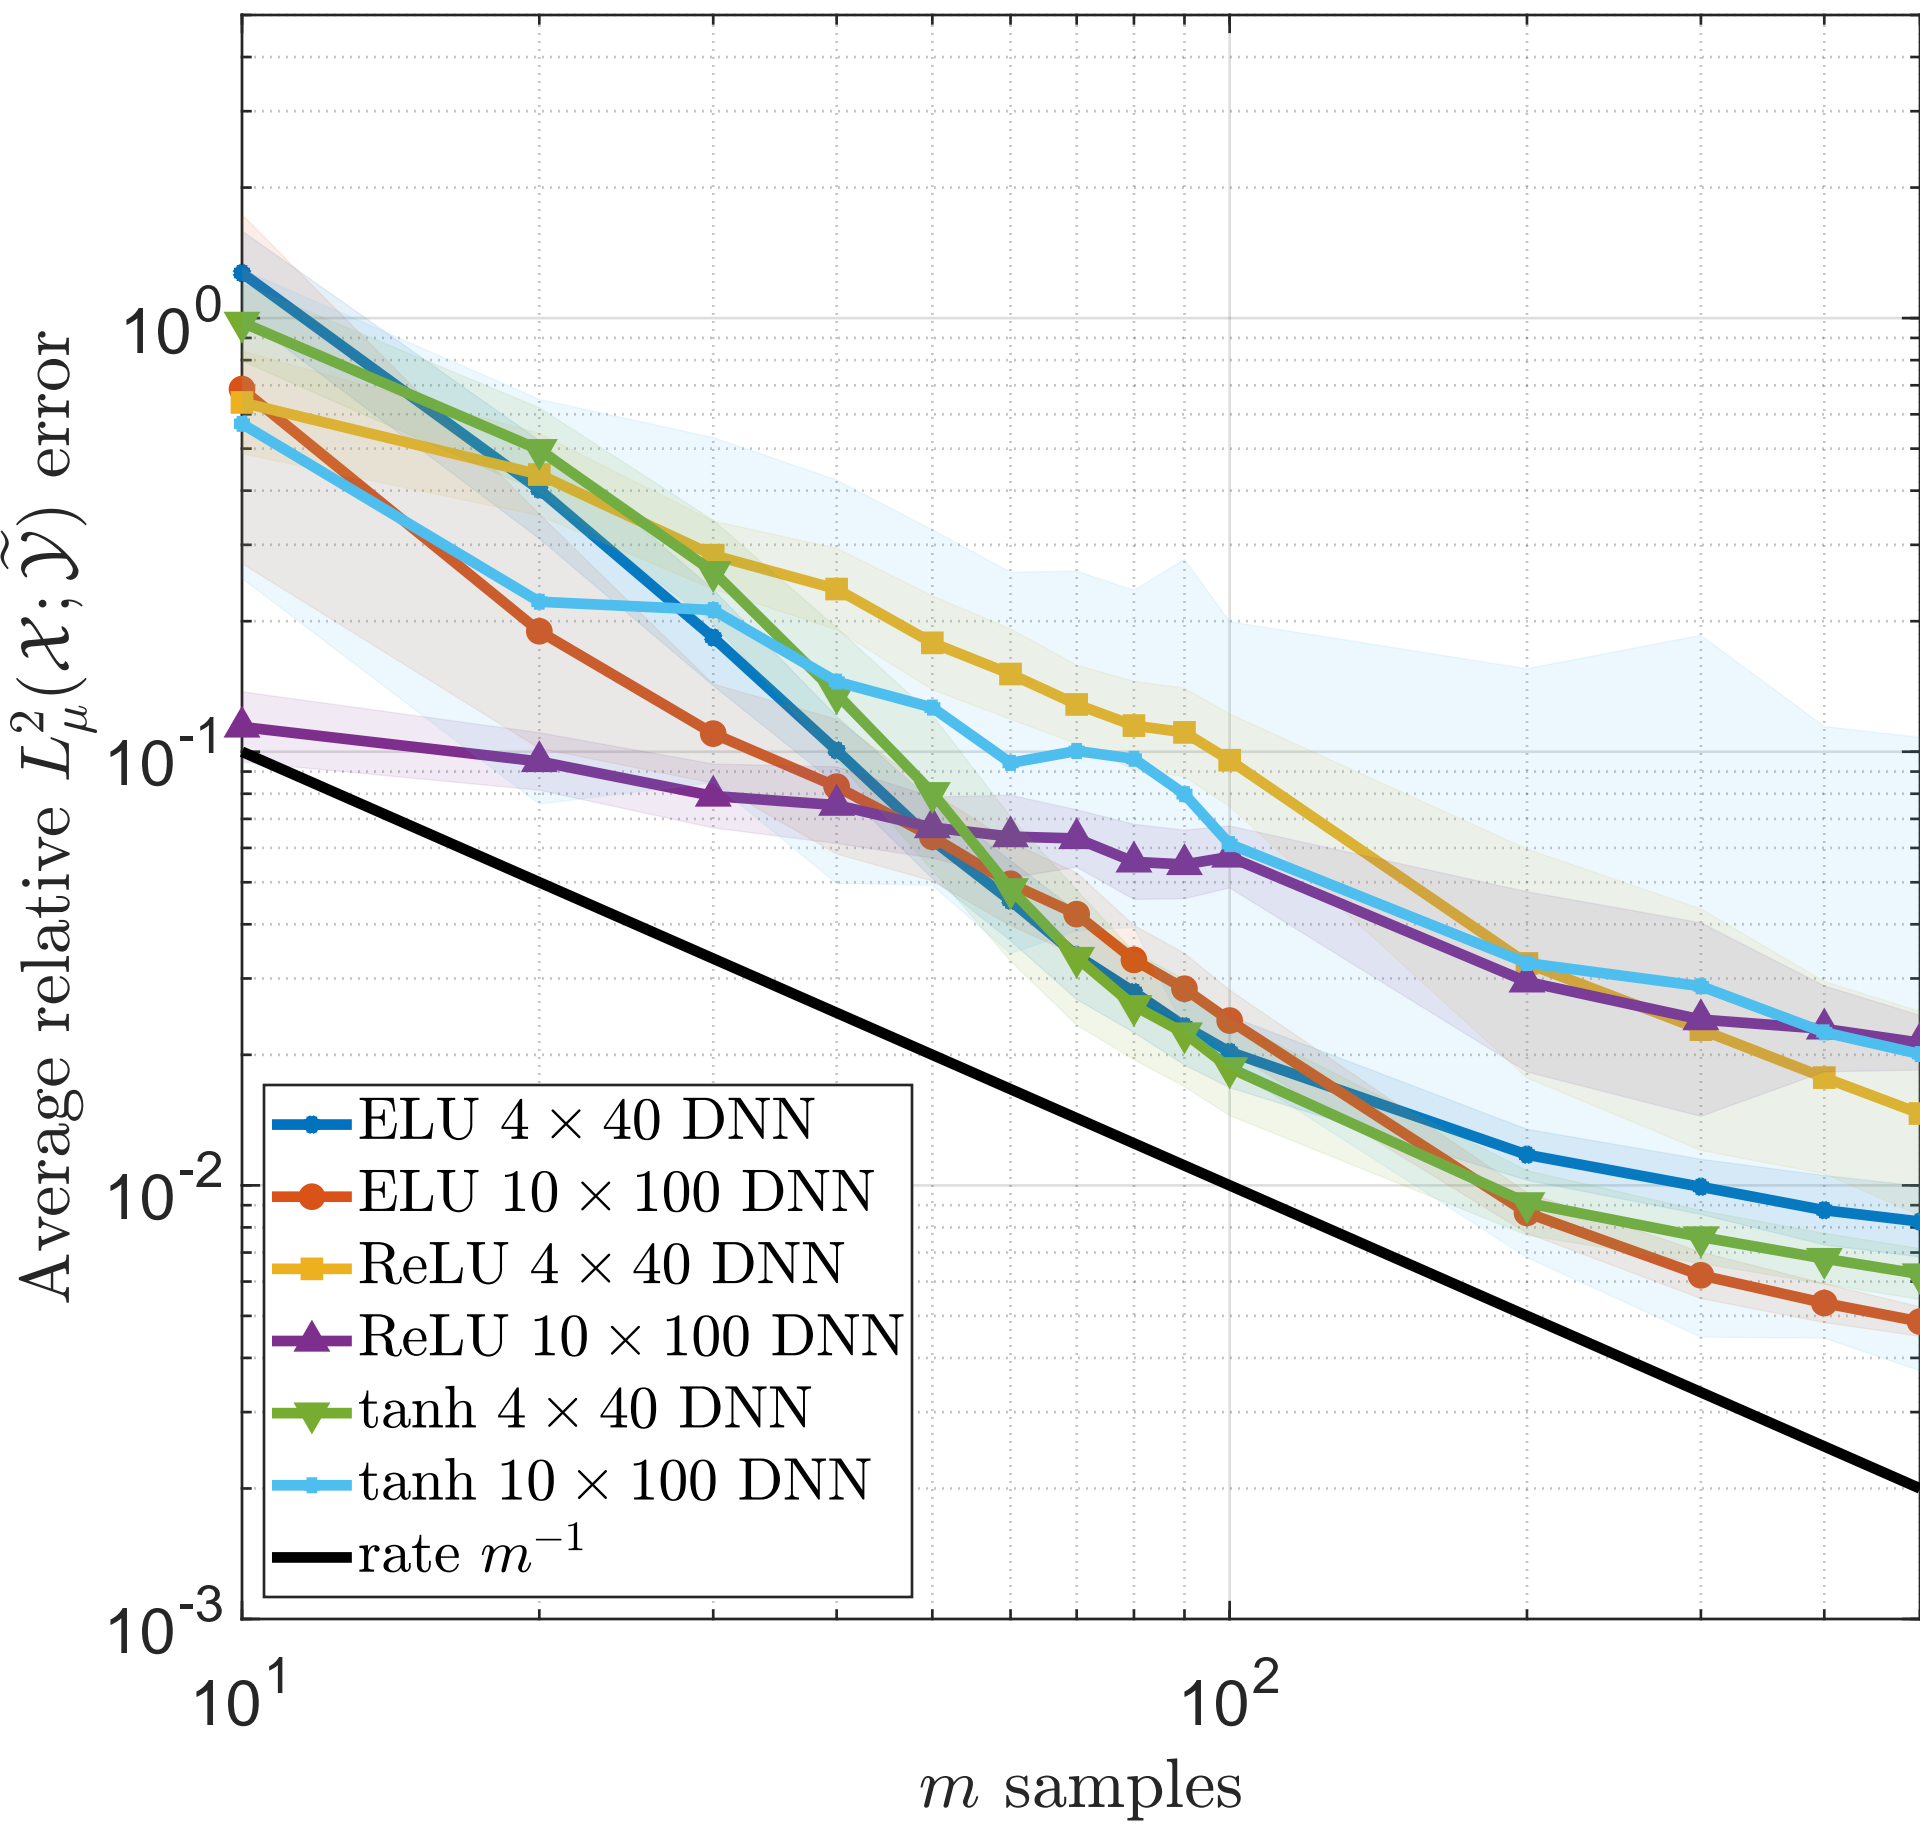

Supplement: supplementary_material [file attachment]

LogKL coeff. Boussinesq  $p \in L_0^2(\Omega)$ ,  $d = 4$

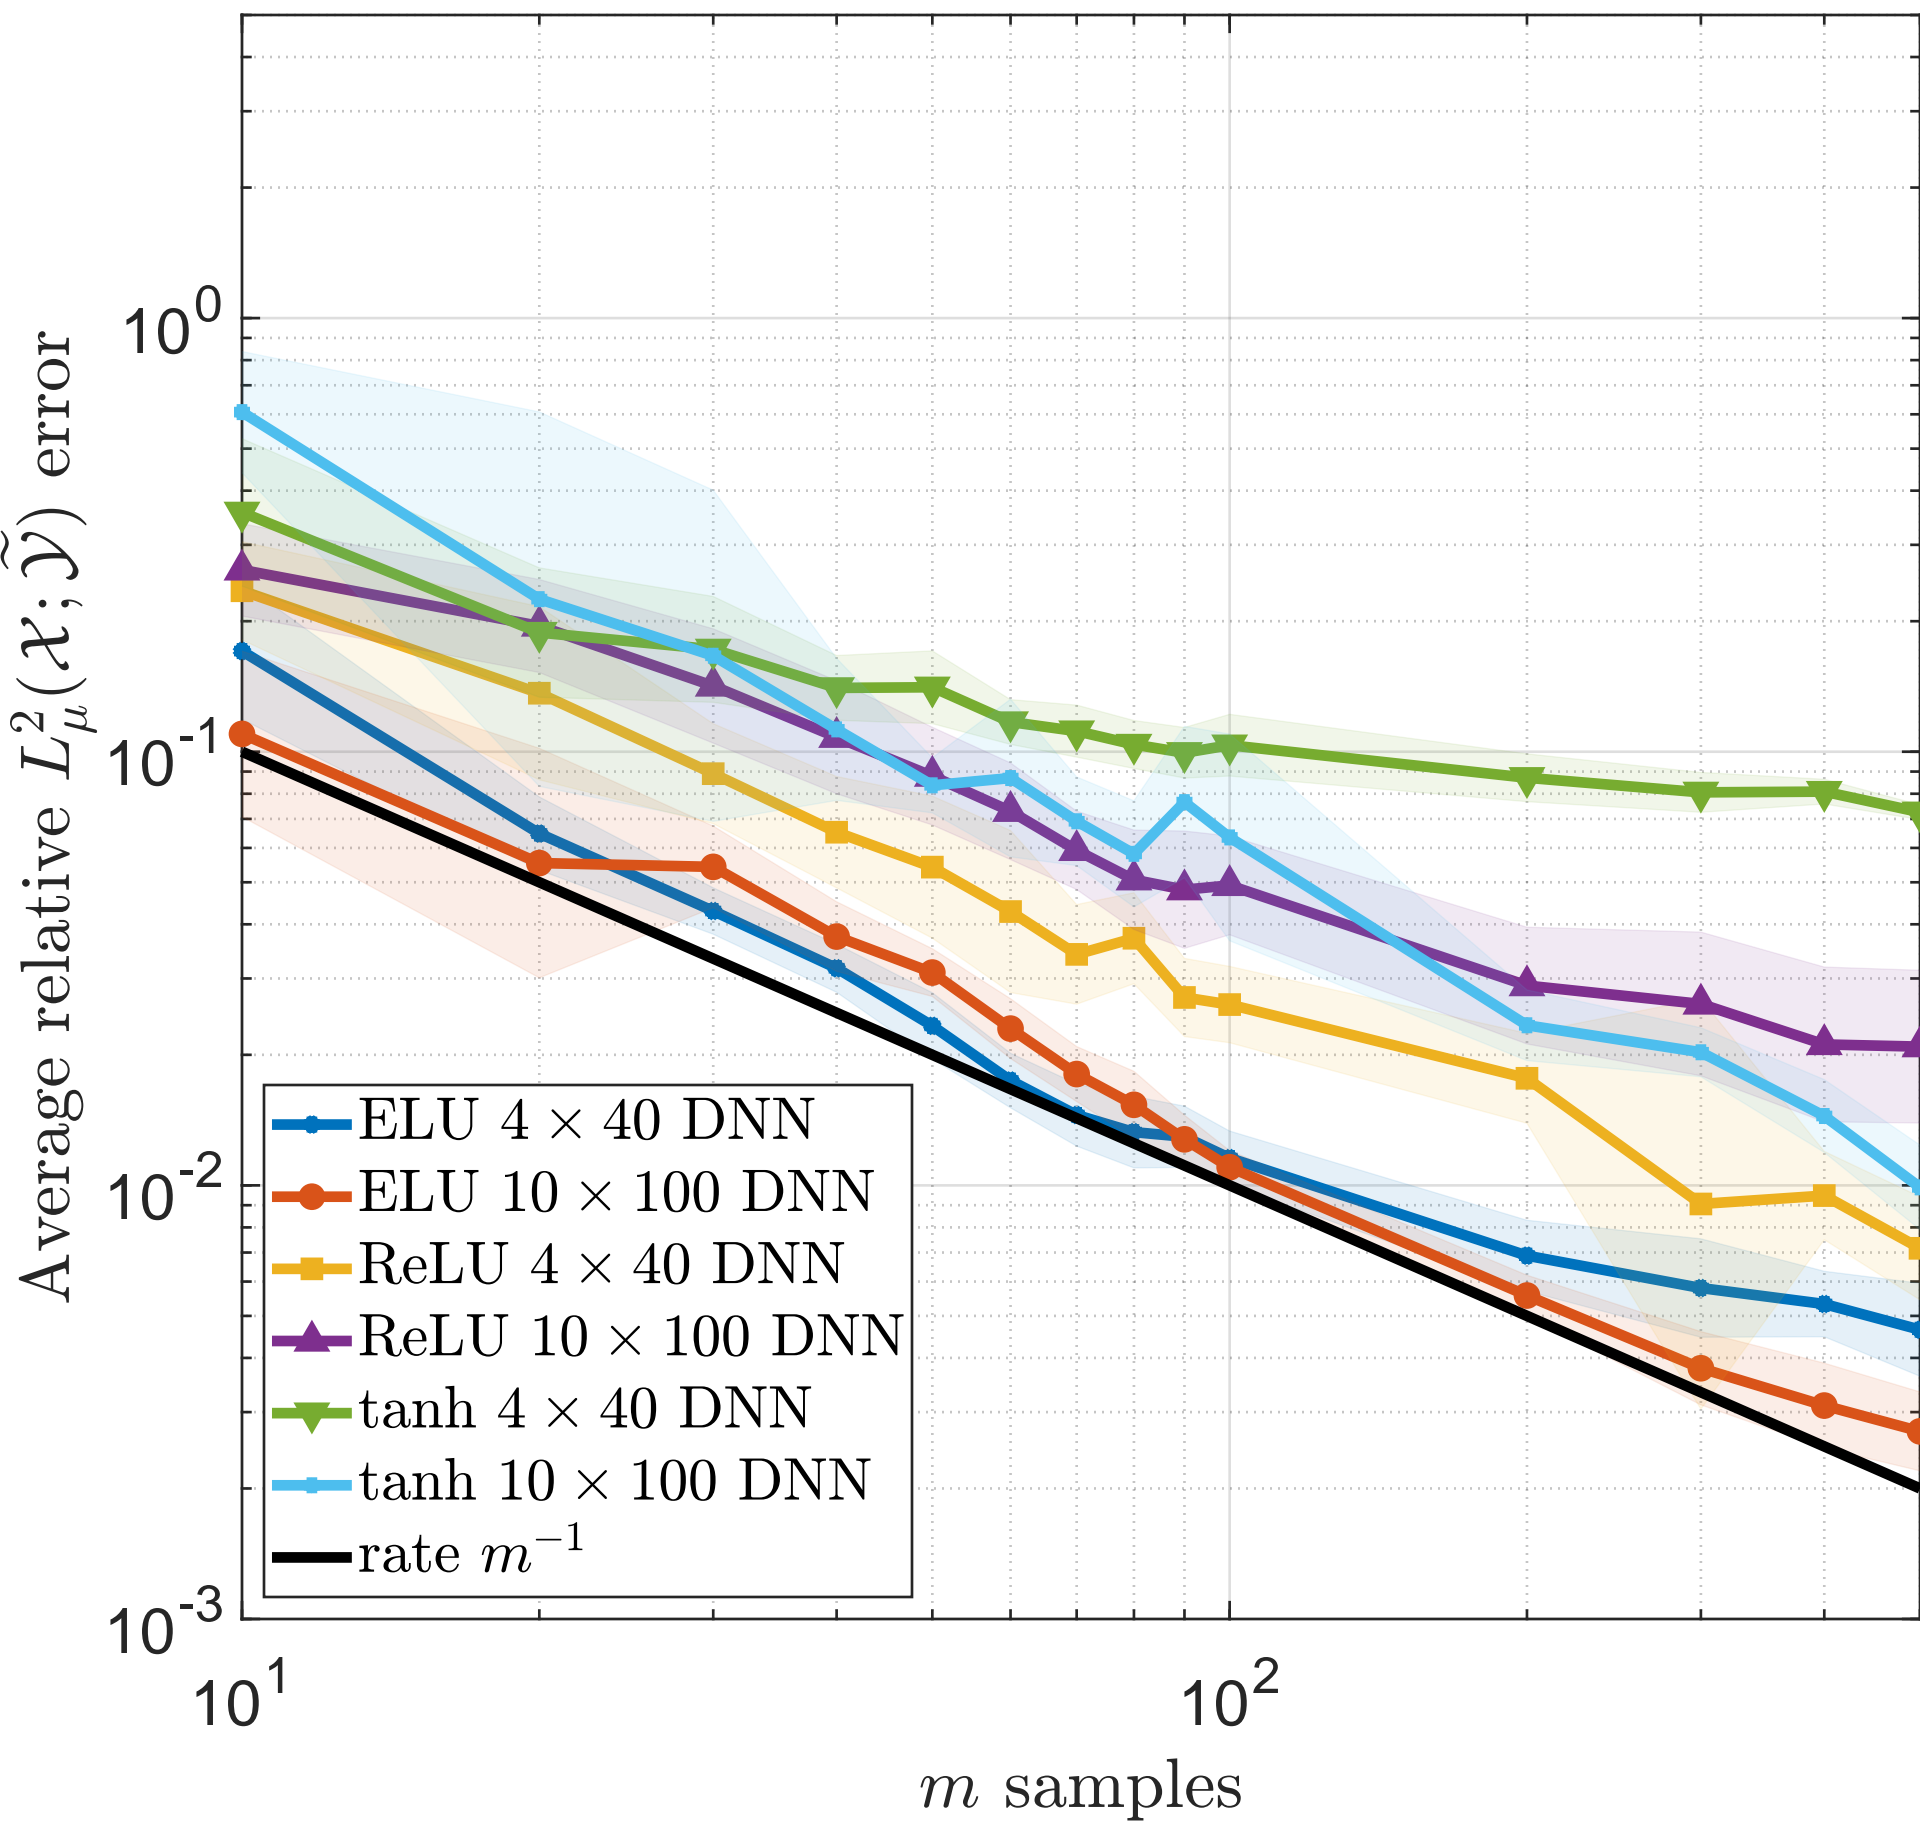

Supplement: supplementary_material [file attachment]

Affine coeff. Boussinesq  $p \in L_0^2(\Omega)$ ,  $d = 8$

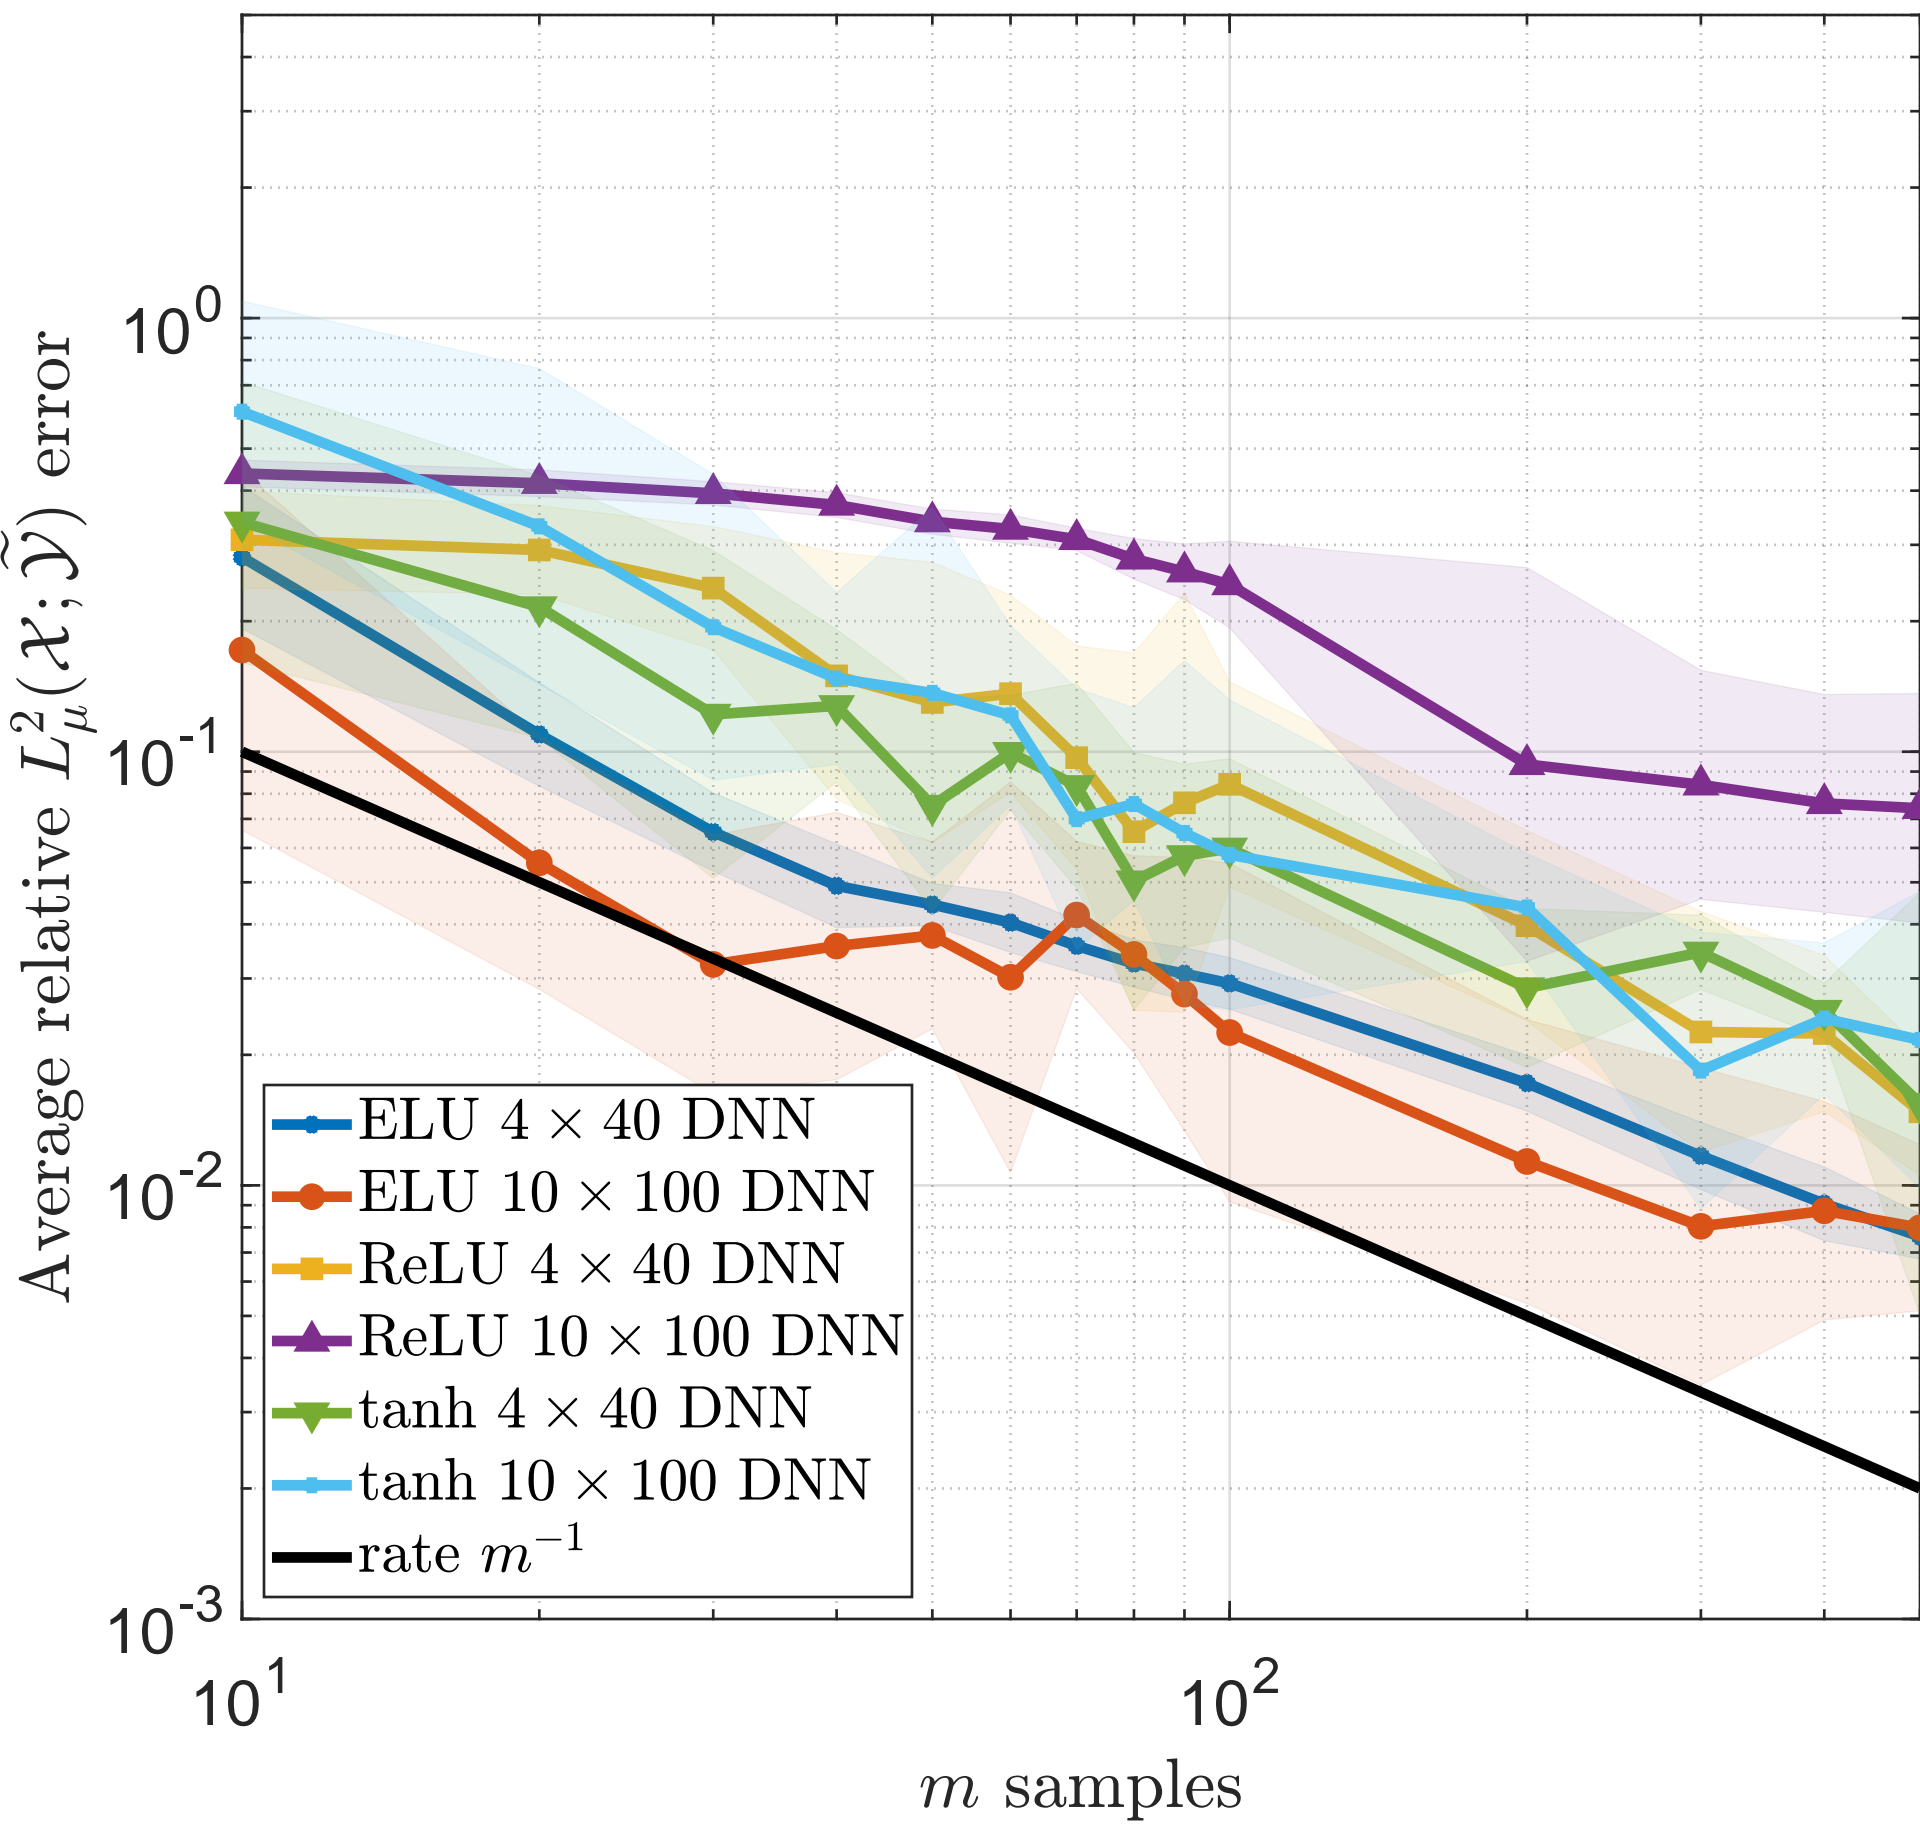

Supplement: supplementary_material [file attachment]

Affine coeff. Boussinesq  $p \in L_0^2(\Omega)$ ,  $d = 4$

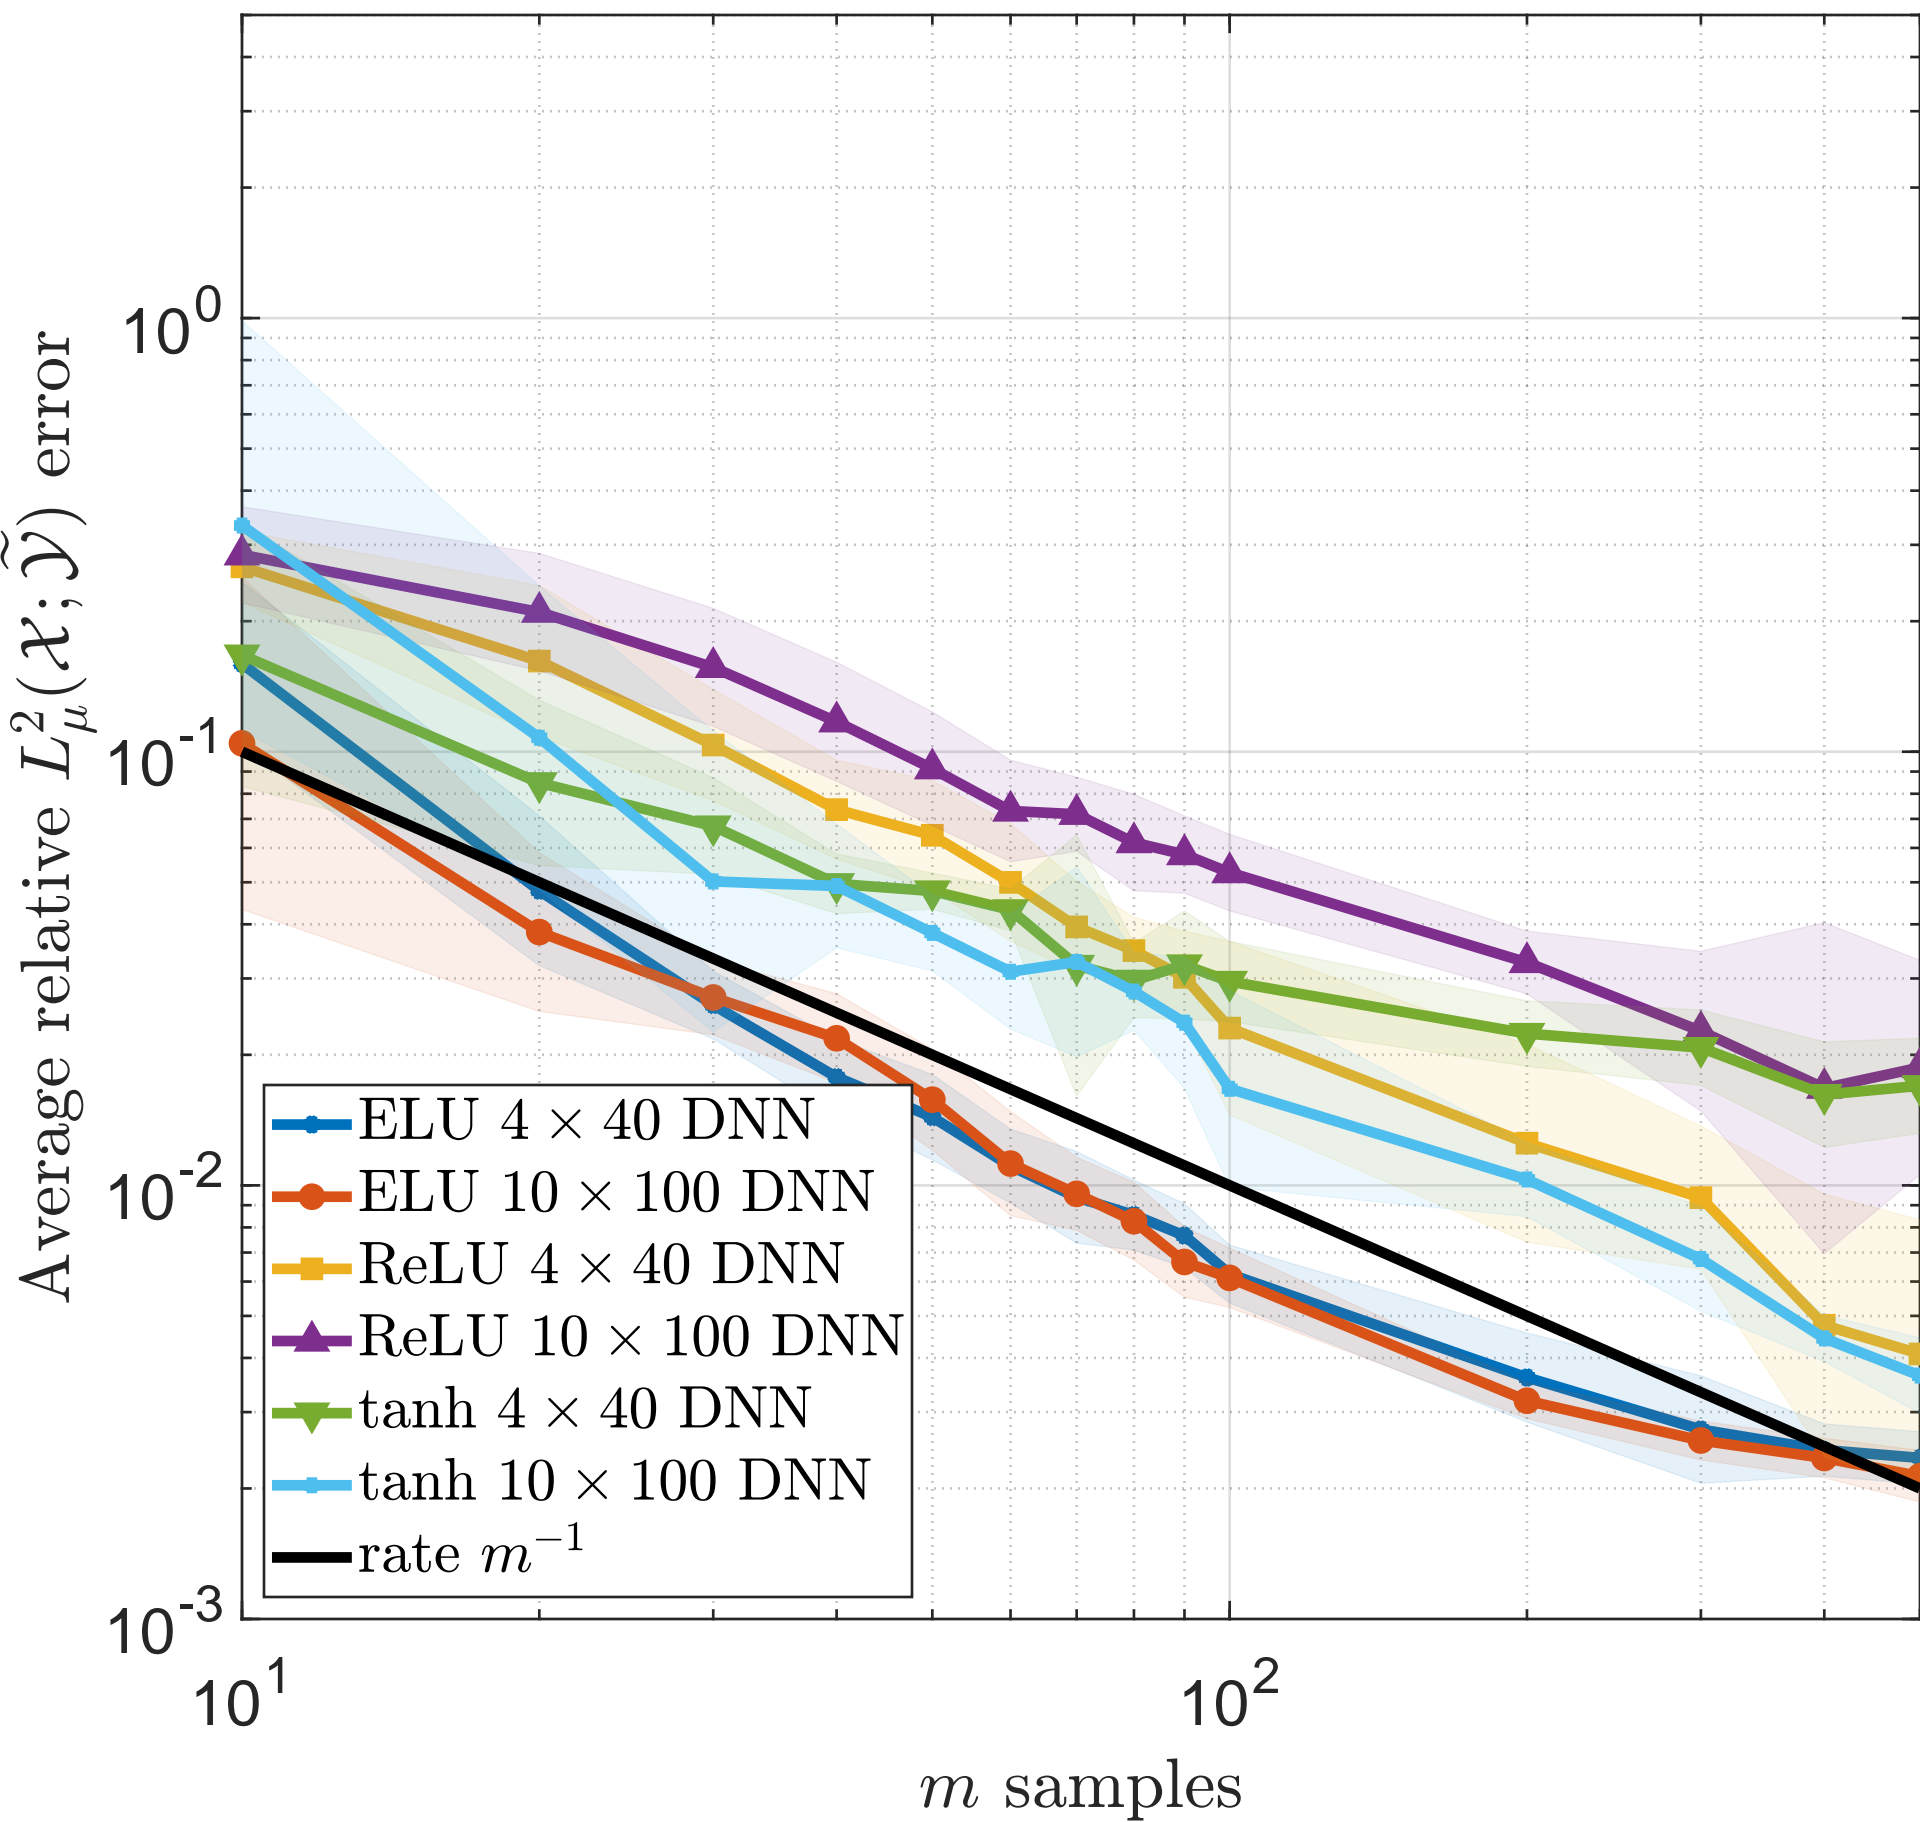

Supplement: supplementary_material [file attachment]

LogKL coeff. Boussinesq  $\varphi \in L^4(\Omega)$ ,  $d = 4$

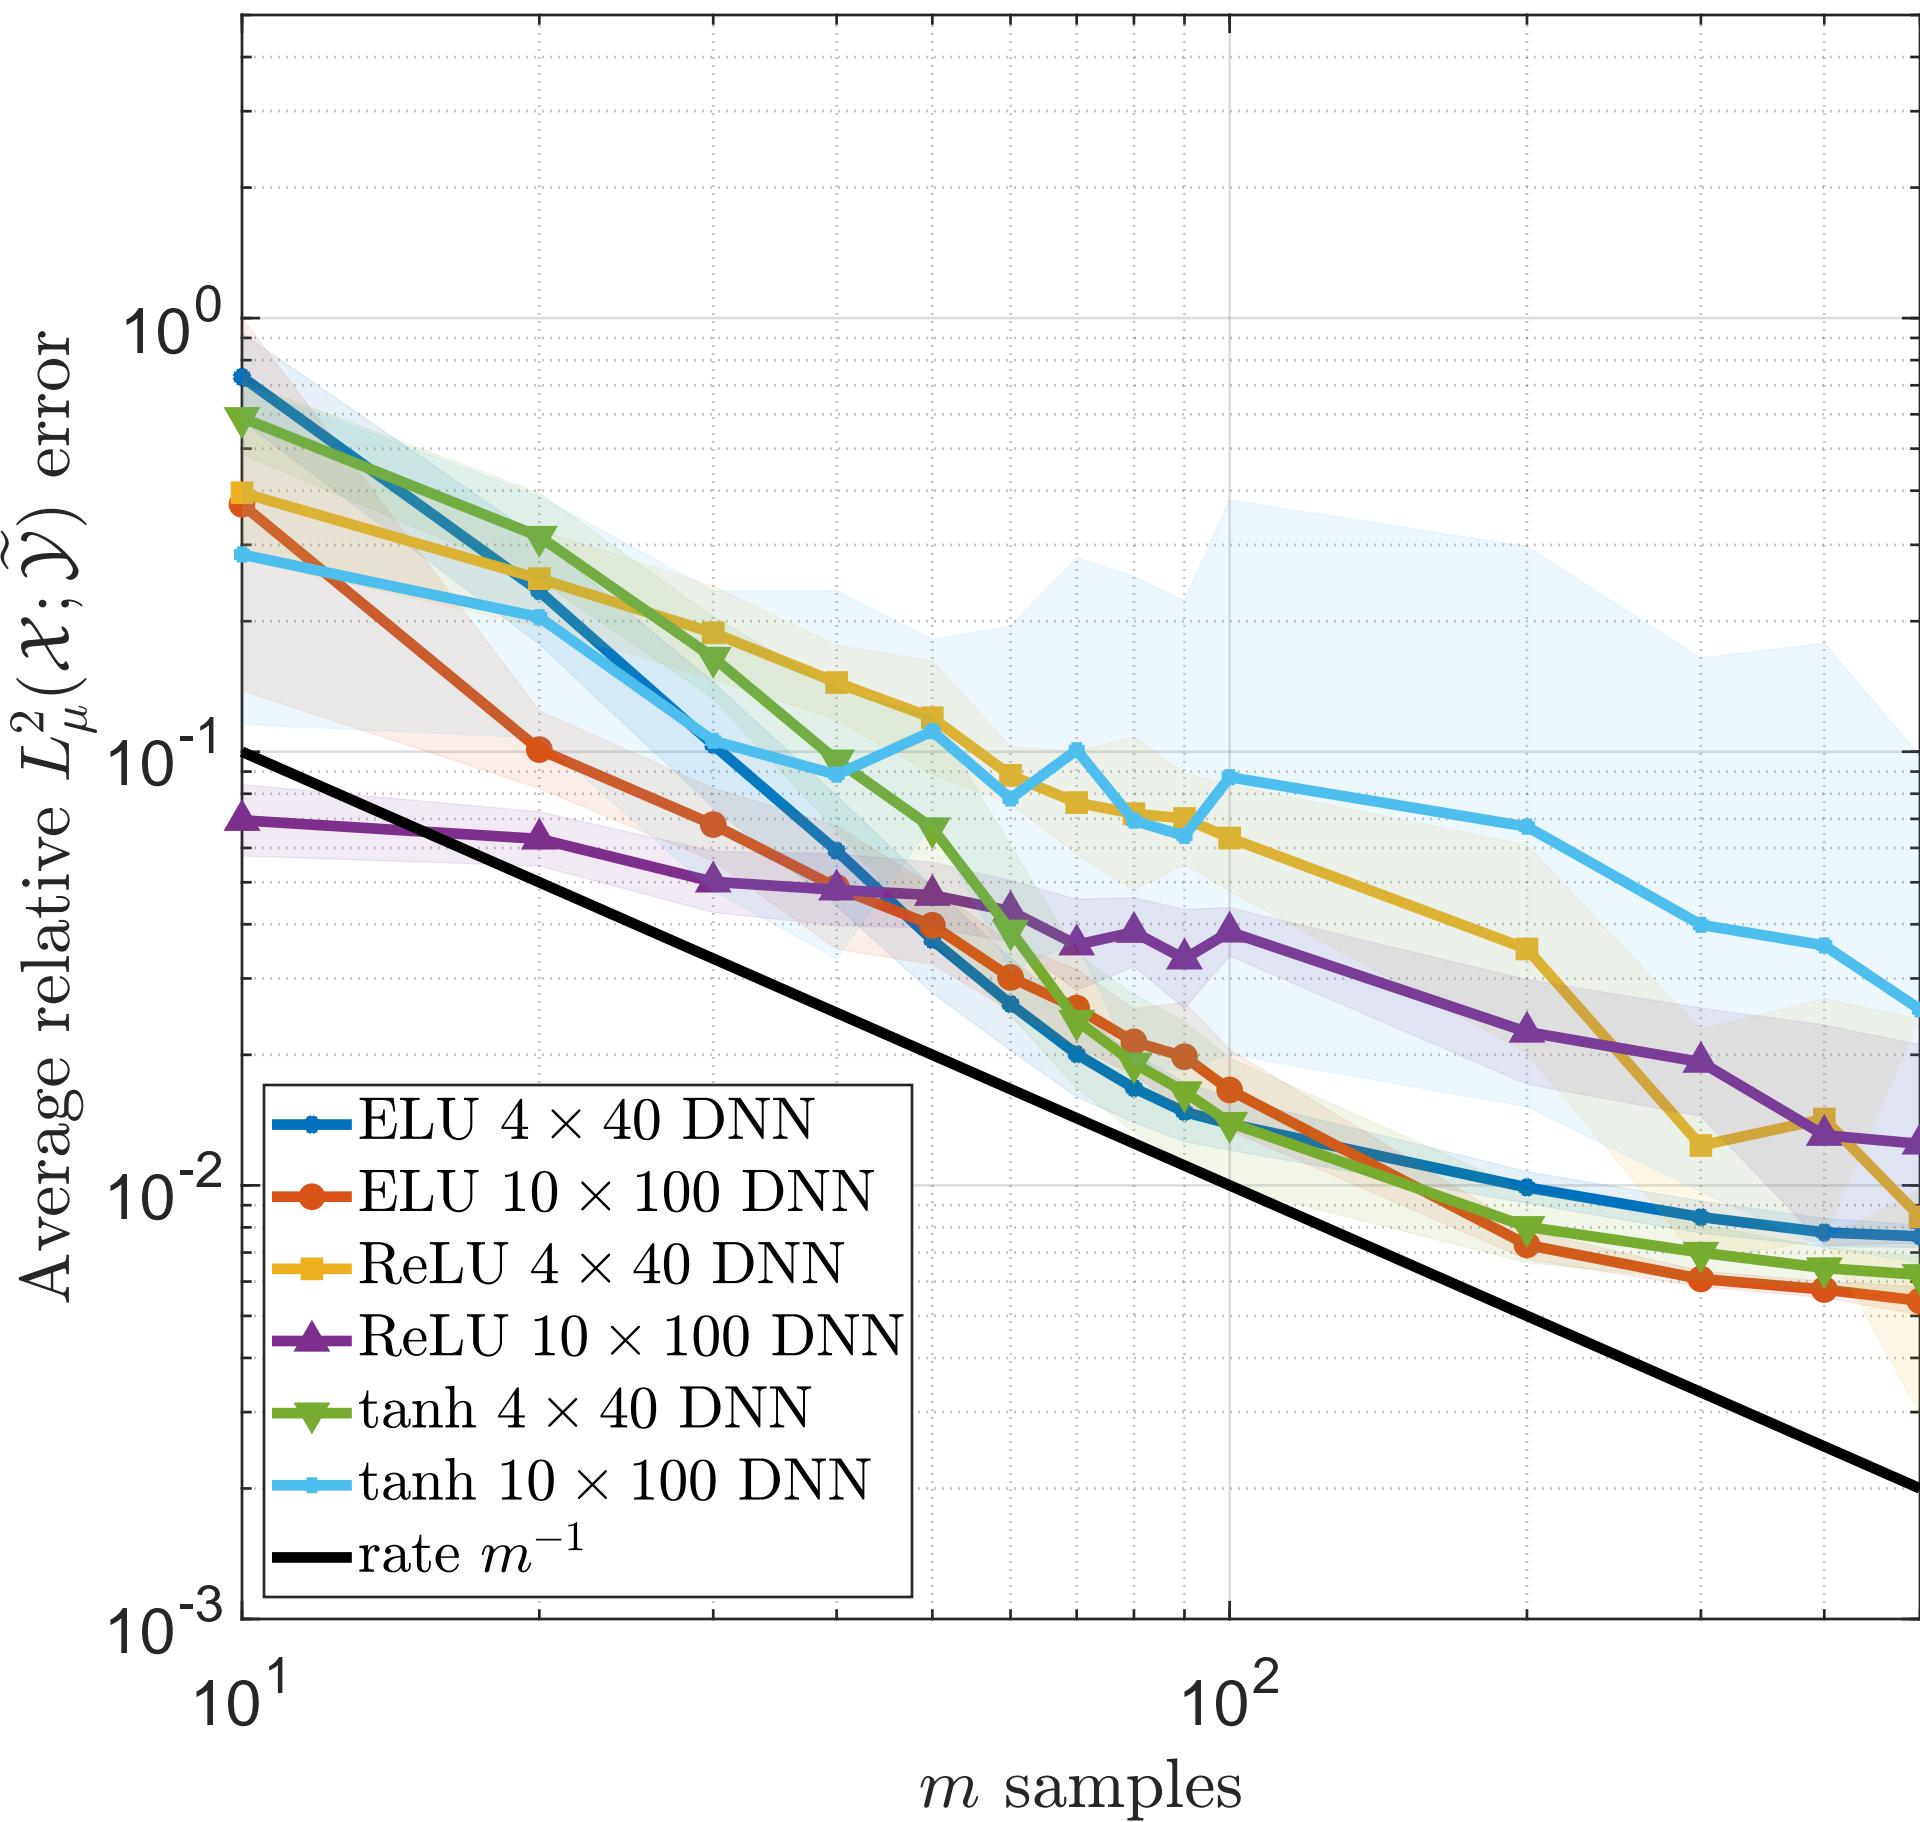

Supplement: supplementary_material [file attachment]

LogKL coeff. Boussinesq  $\varphi \in L^4(\Omega)$ ,  $d = 8$

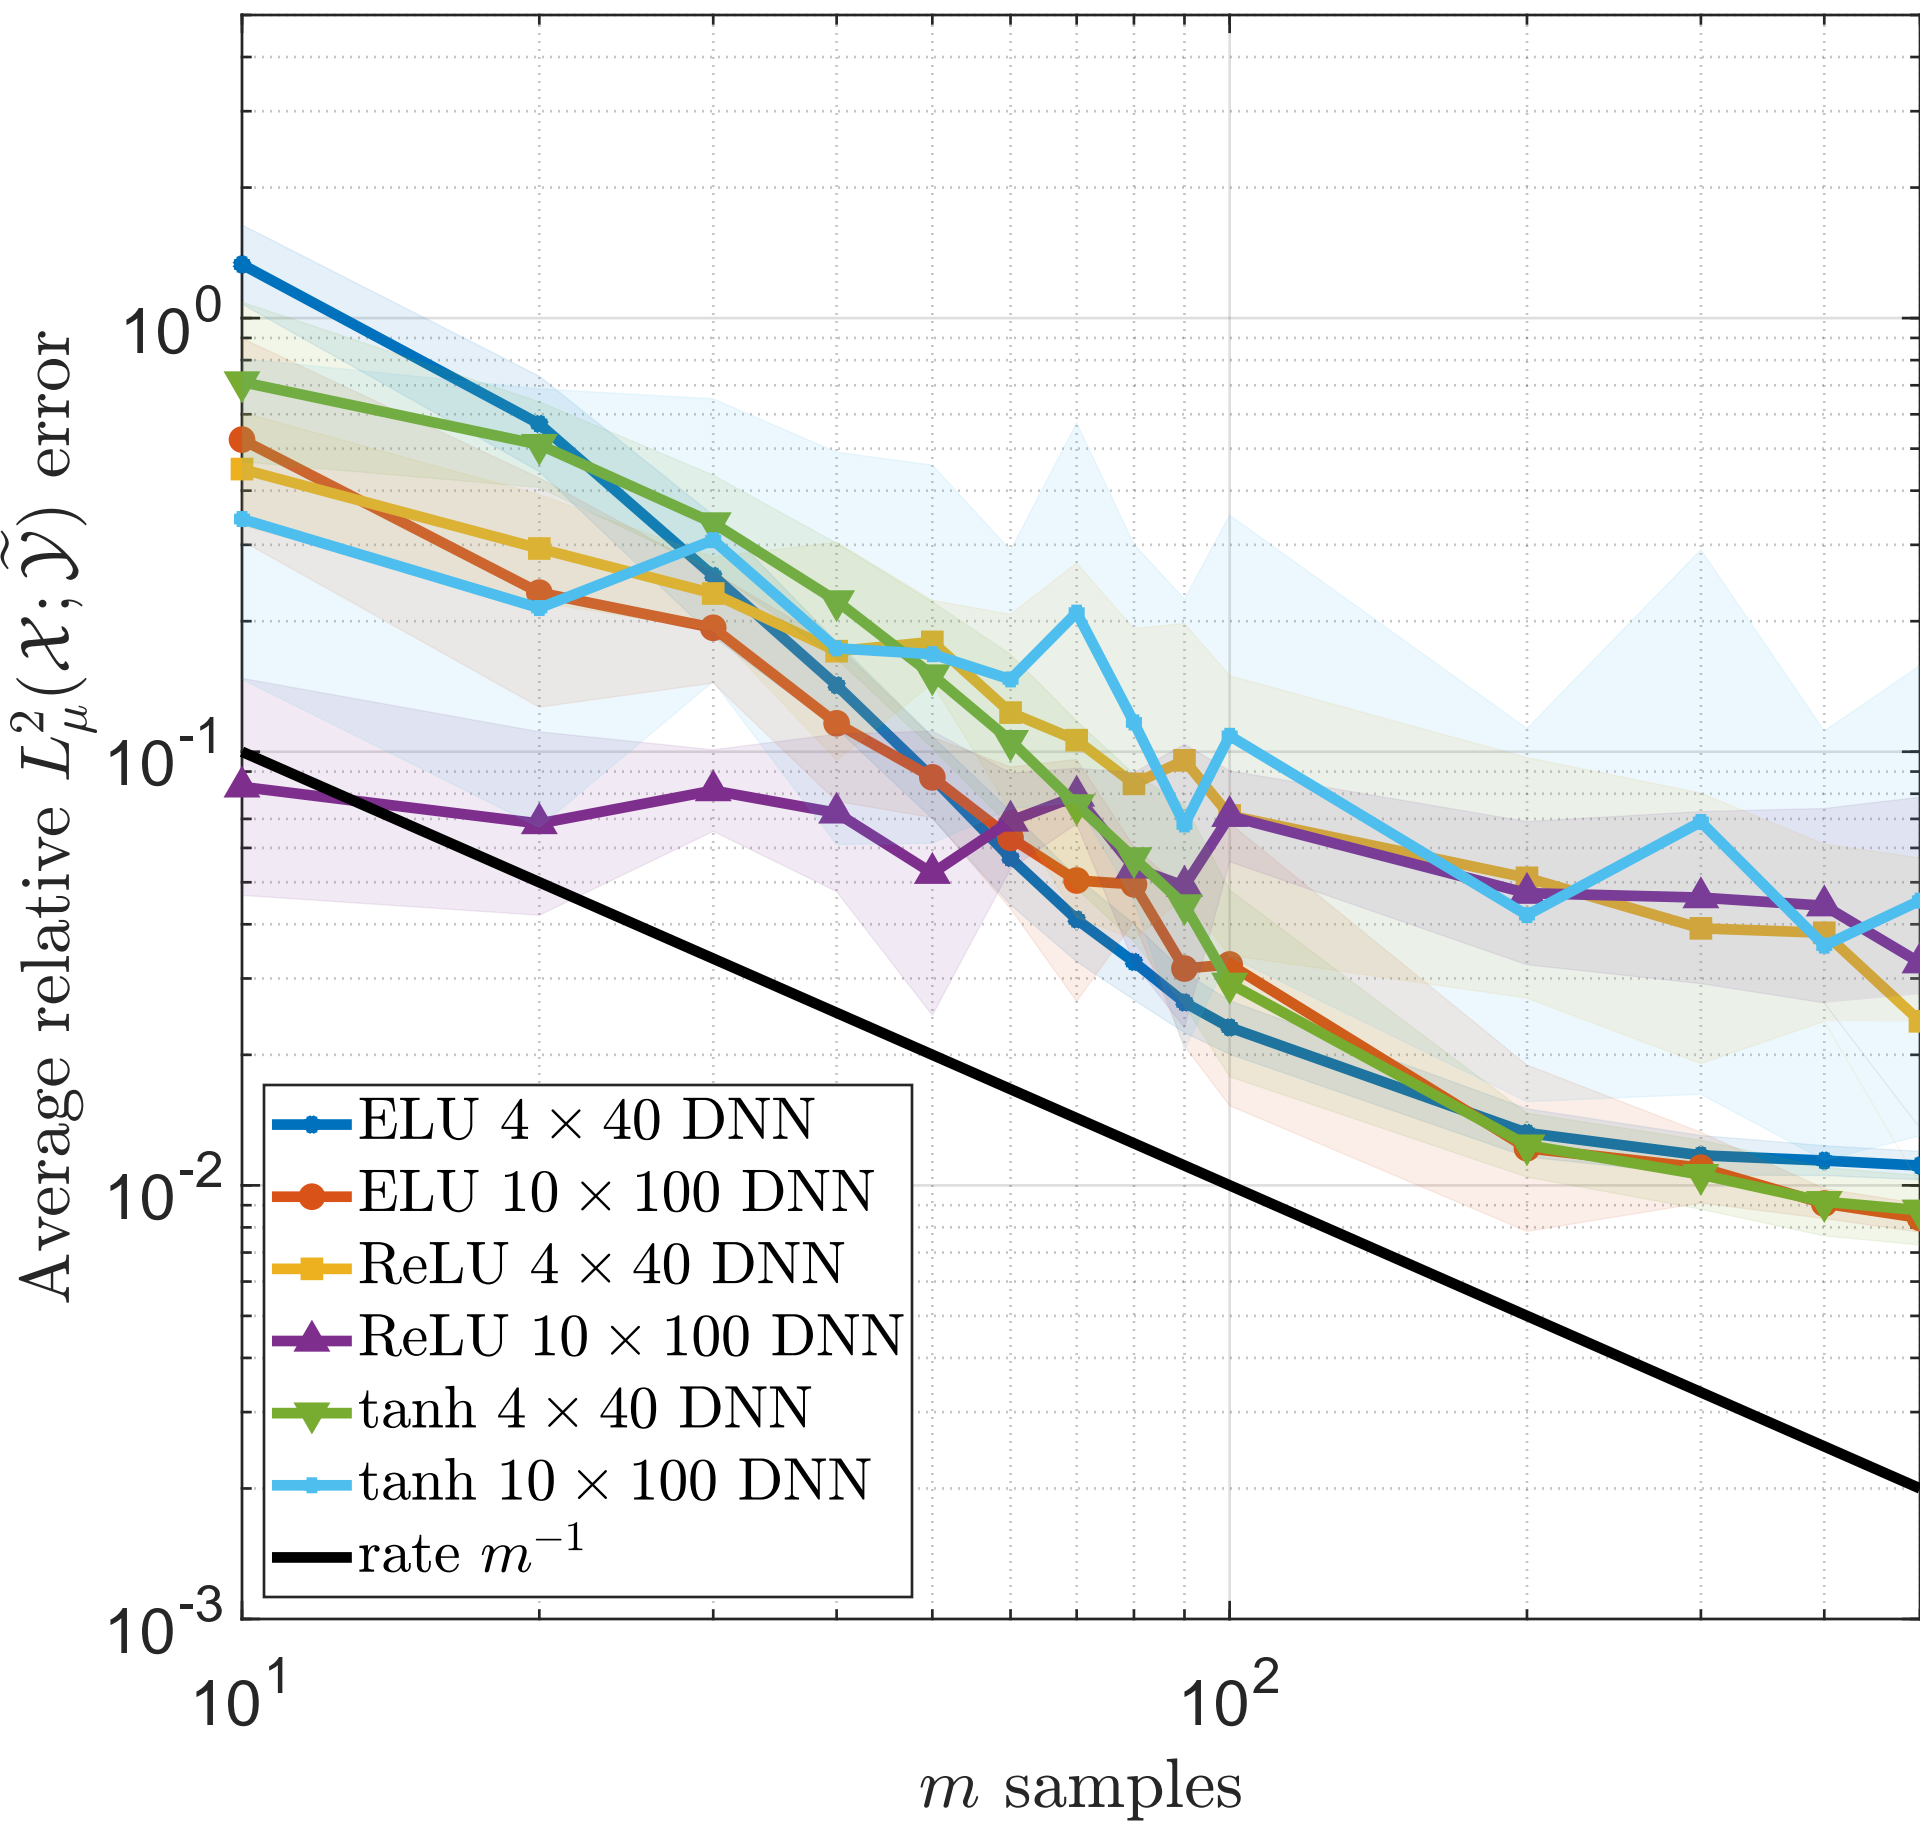

Supplement: supplementary_material [file attachment]

Affine coeff. NSB  $u \in \mathbf{L}^4(\Omega)$ ,  $d = 8$

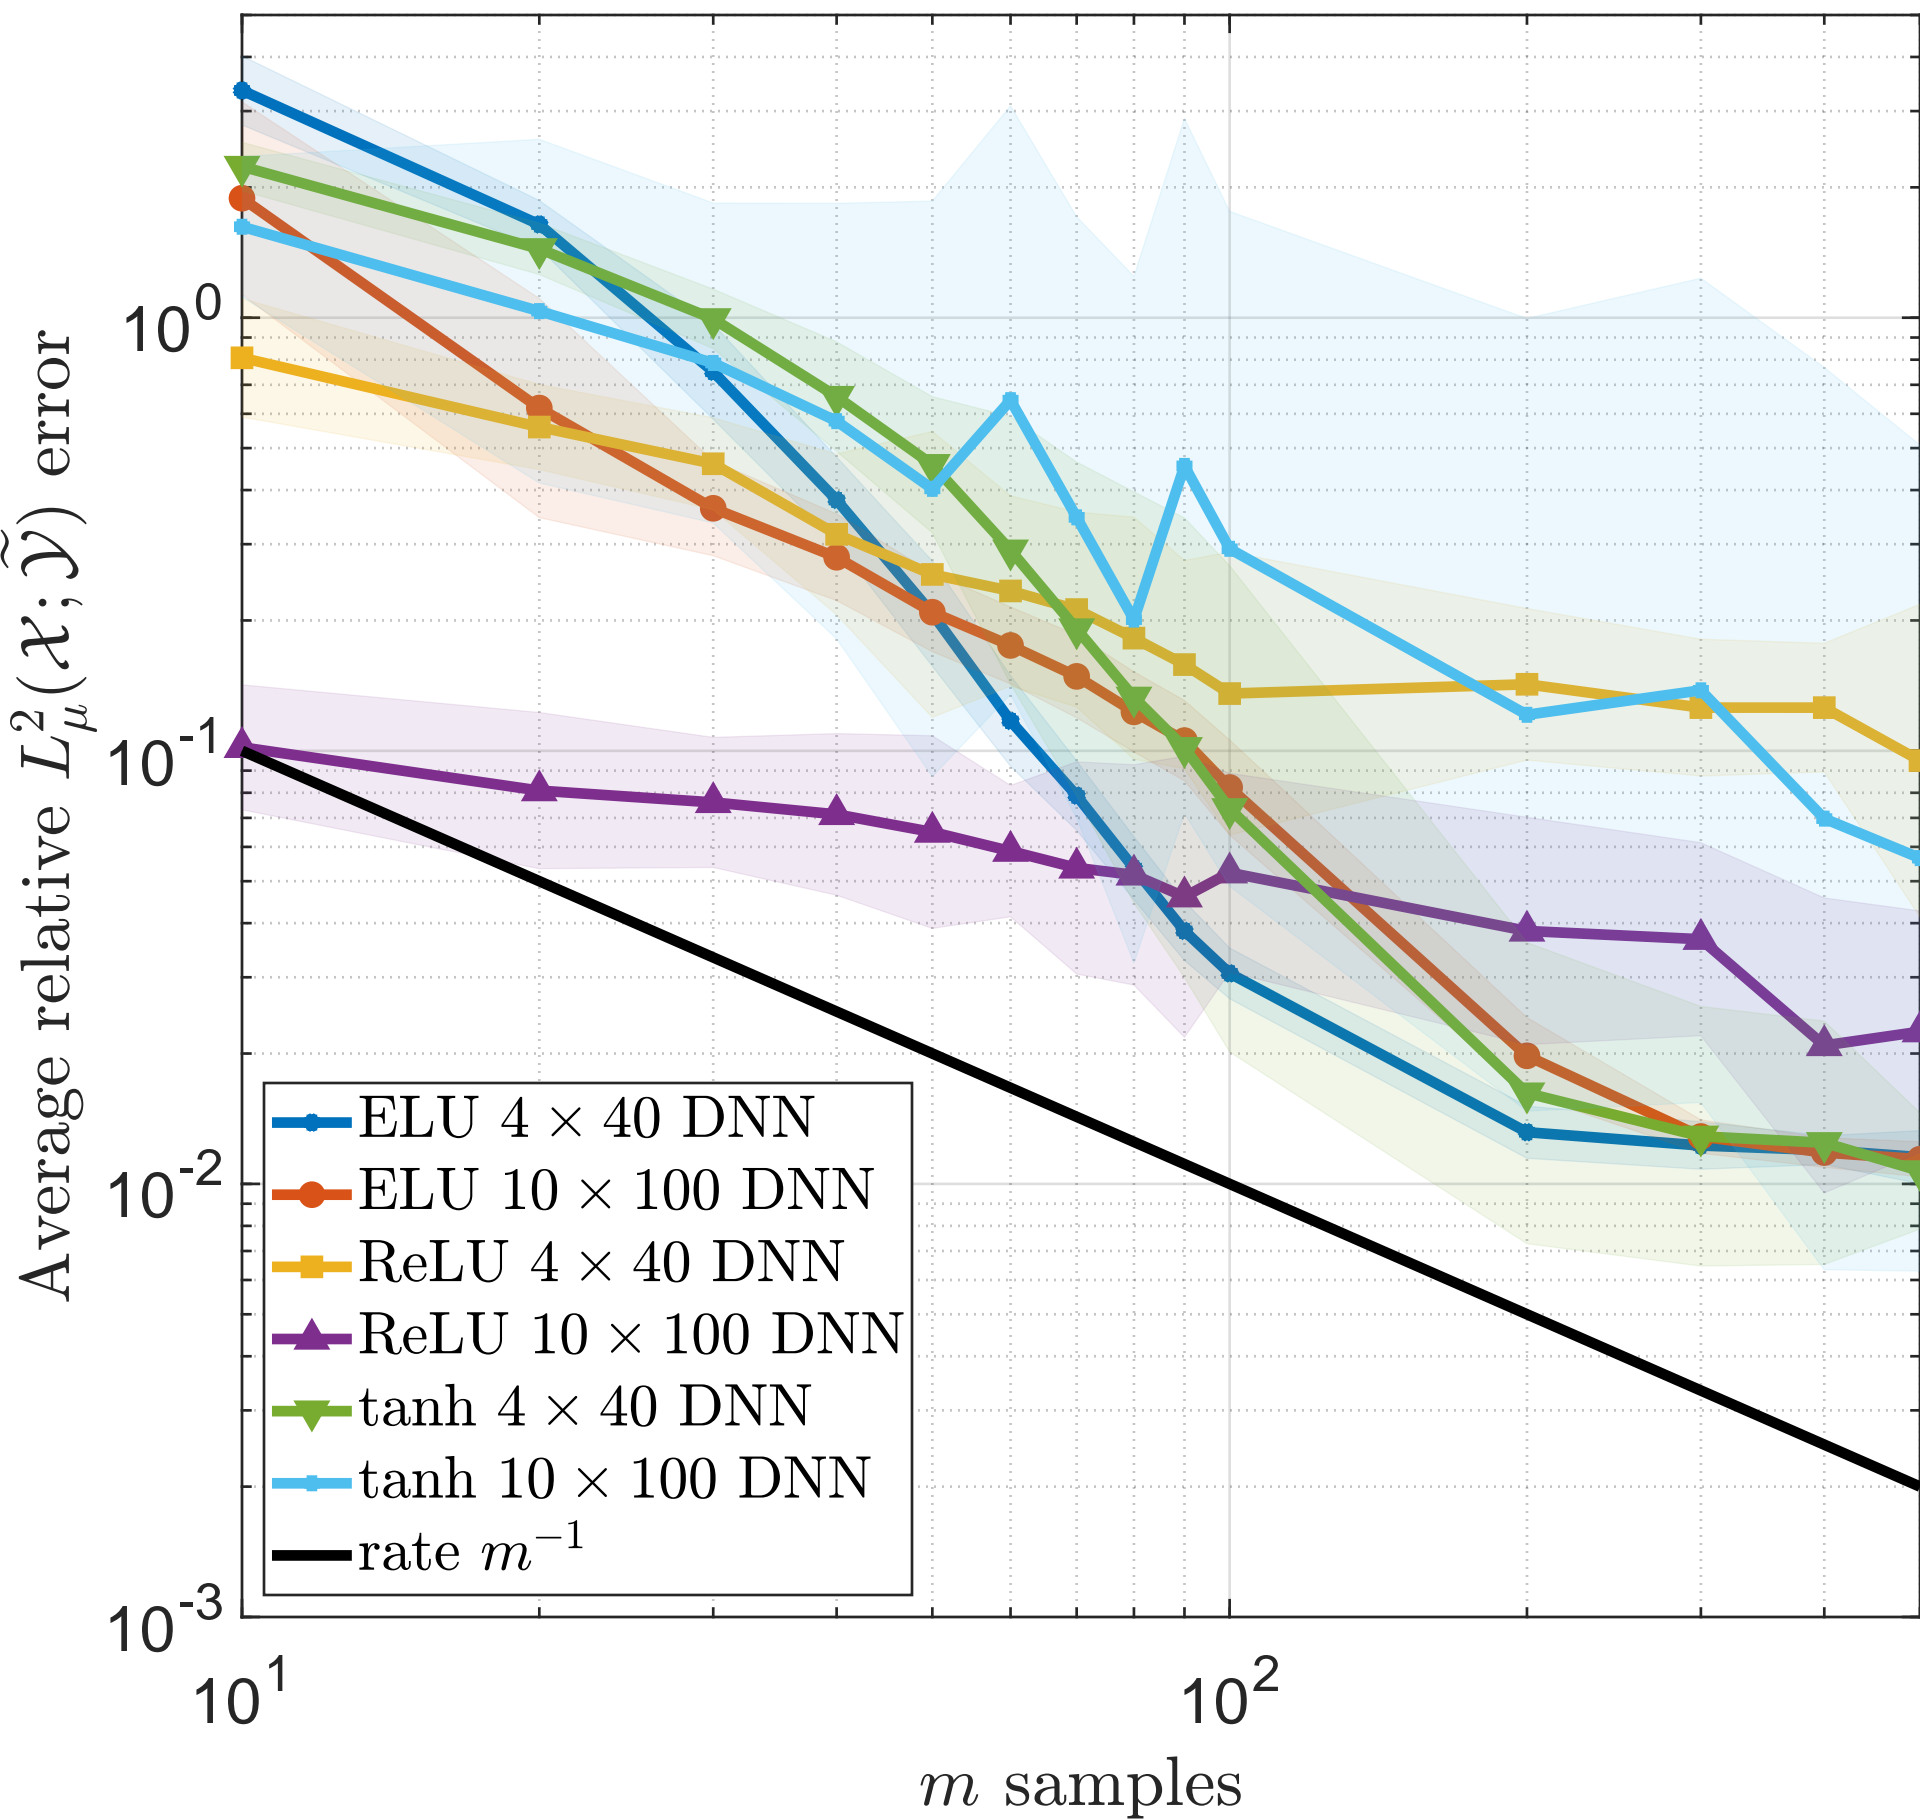

Supplement: supplementary_material [file attachment]

LogKL coeff. NSB  $p \in L^2(\Omega)$ ,  $d = 8$

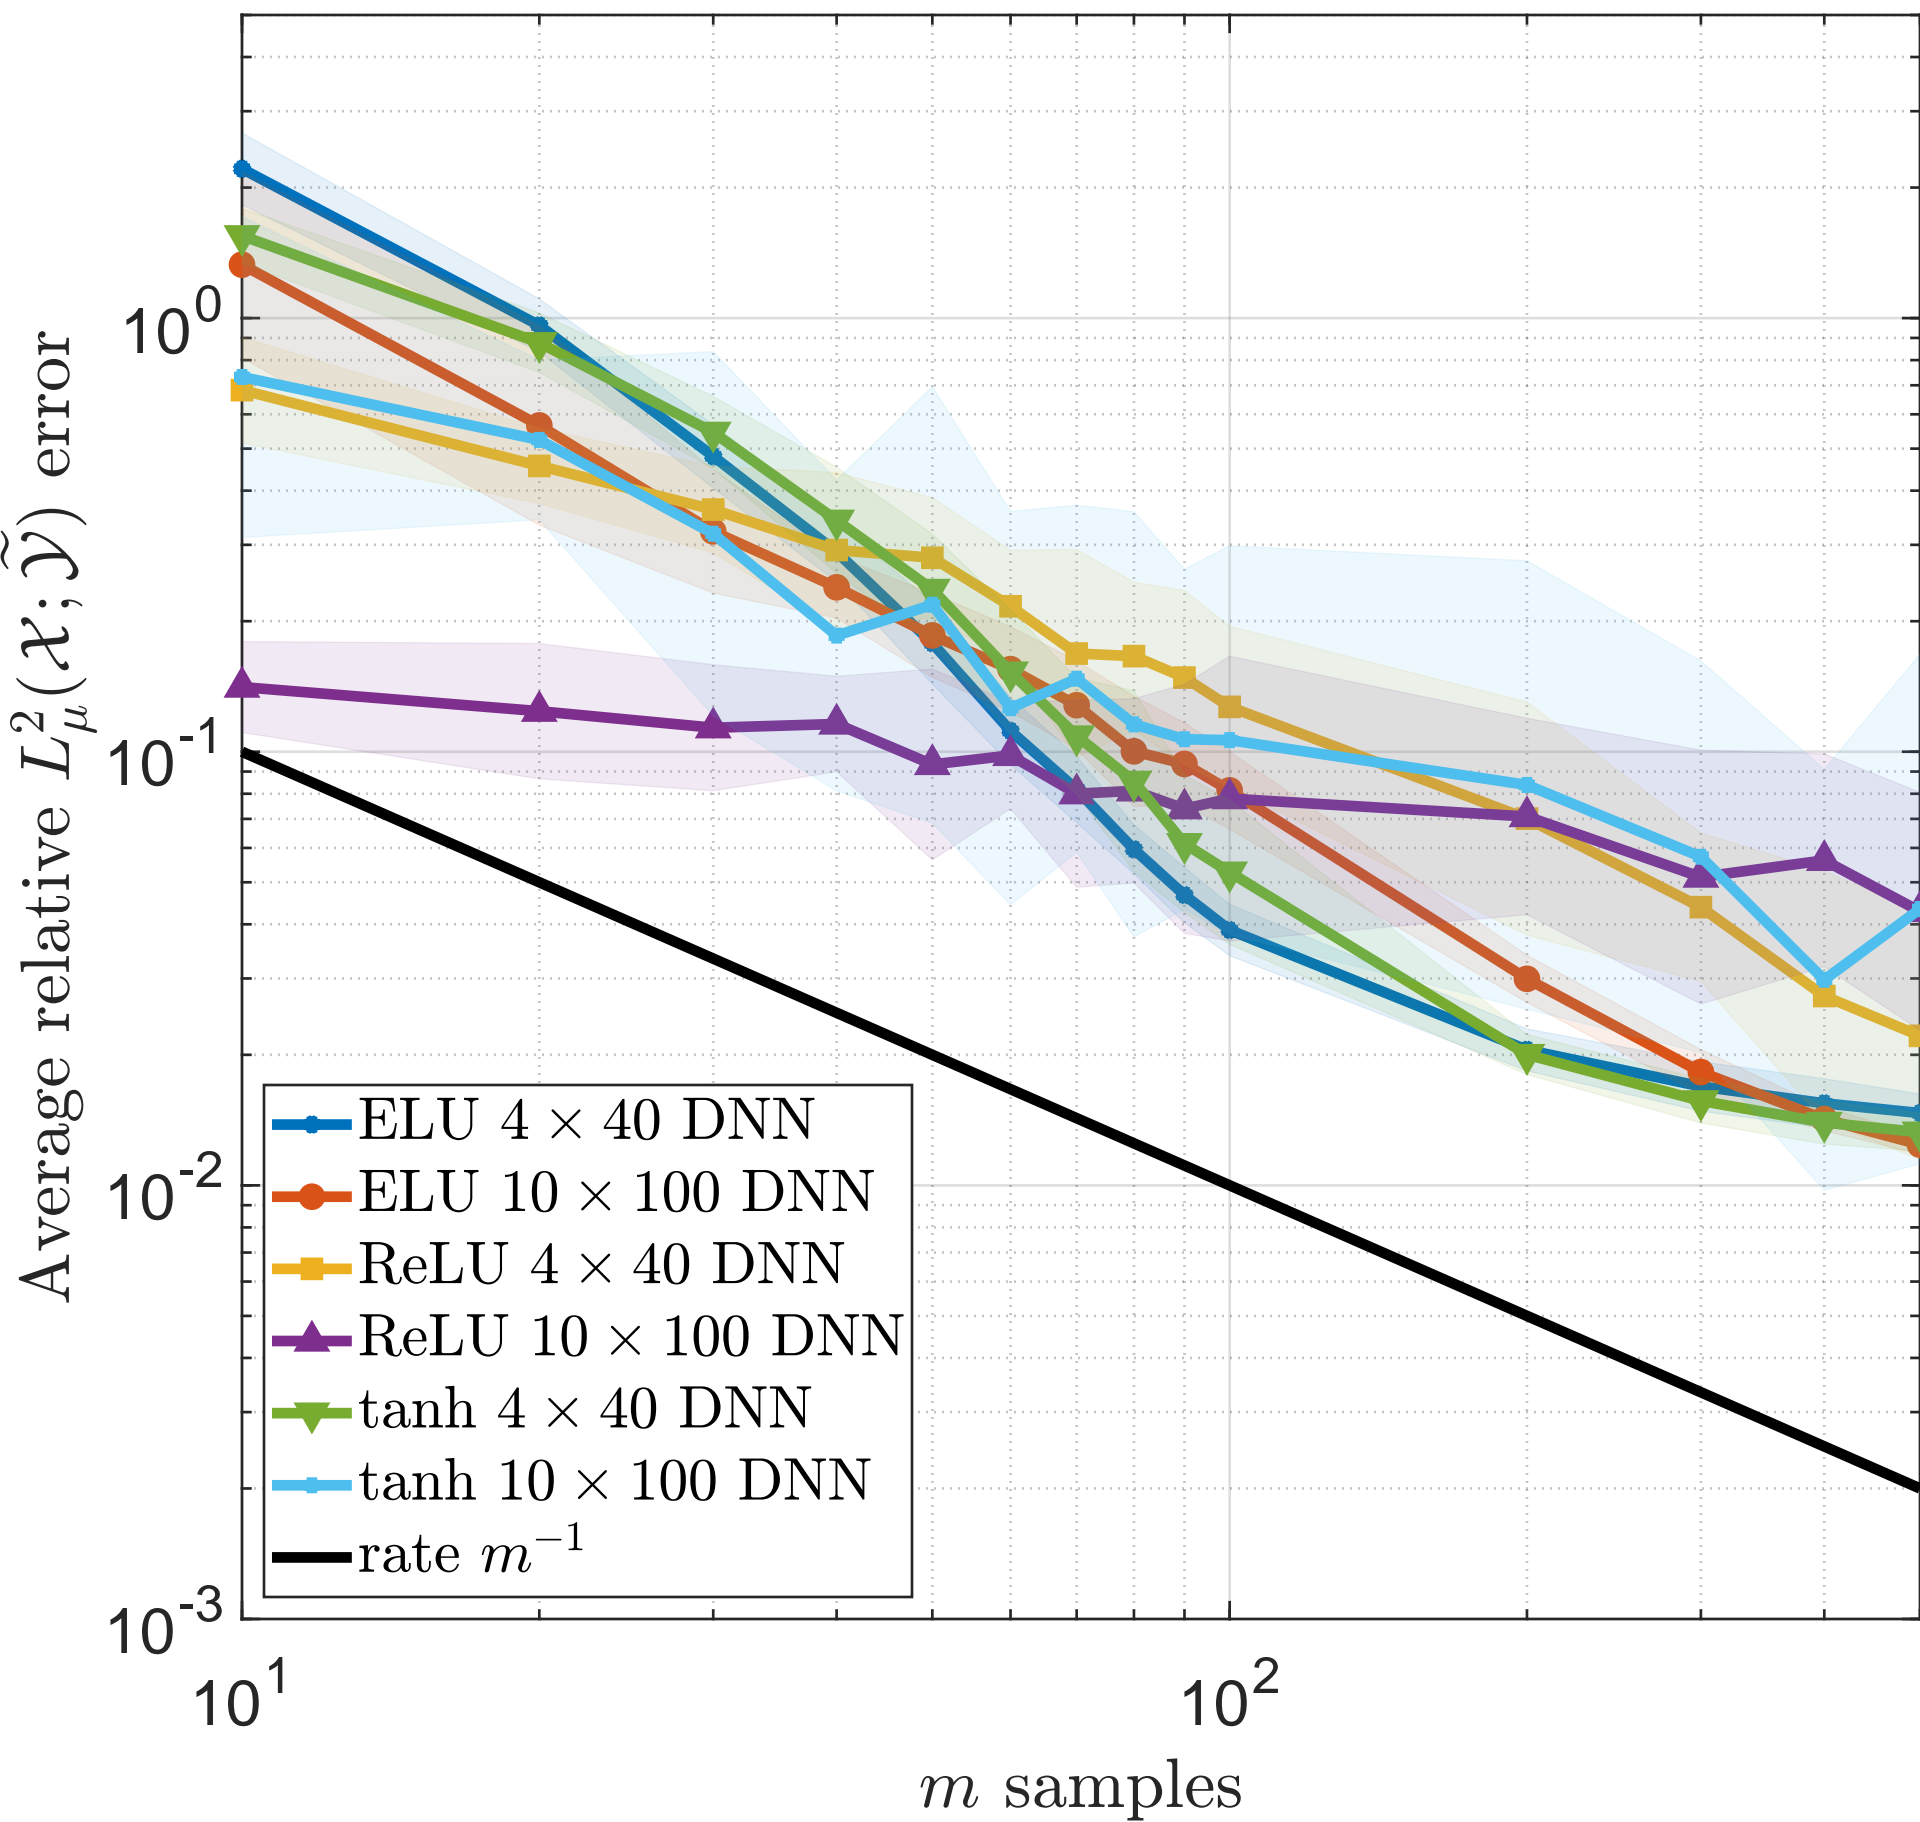

Supplement: supplementary_material [file attachment]

LogKL coeff. NSB  $u \in \mathbf{L}^4(\Omega)$ ,  $d = 8$

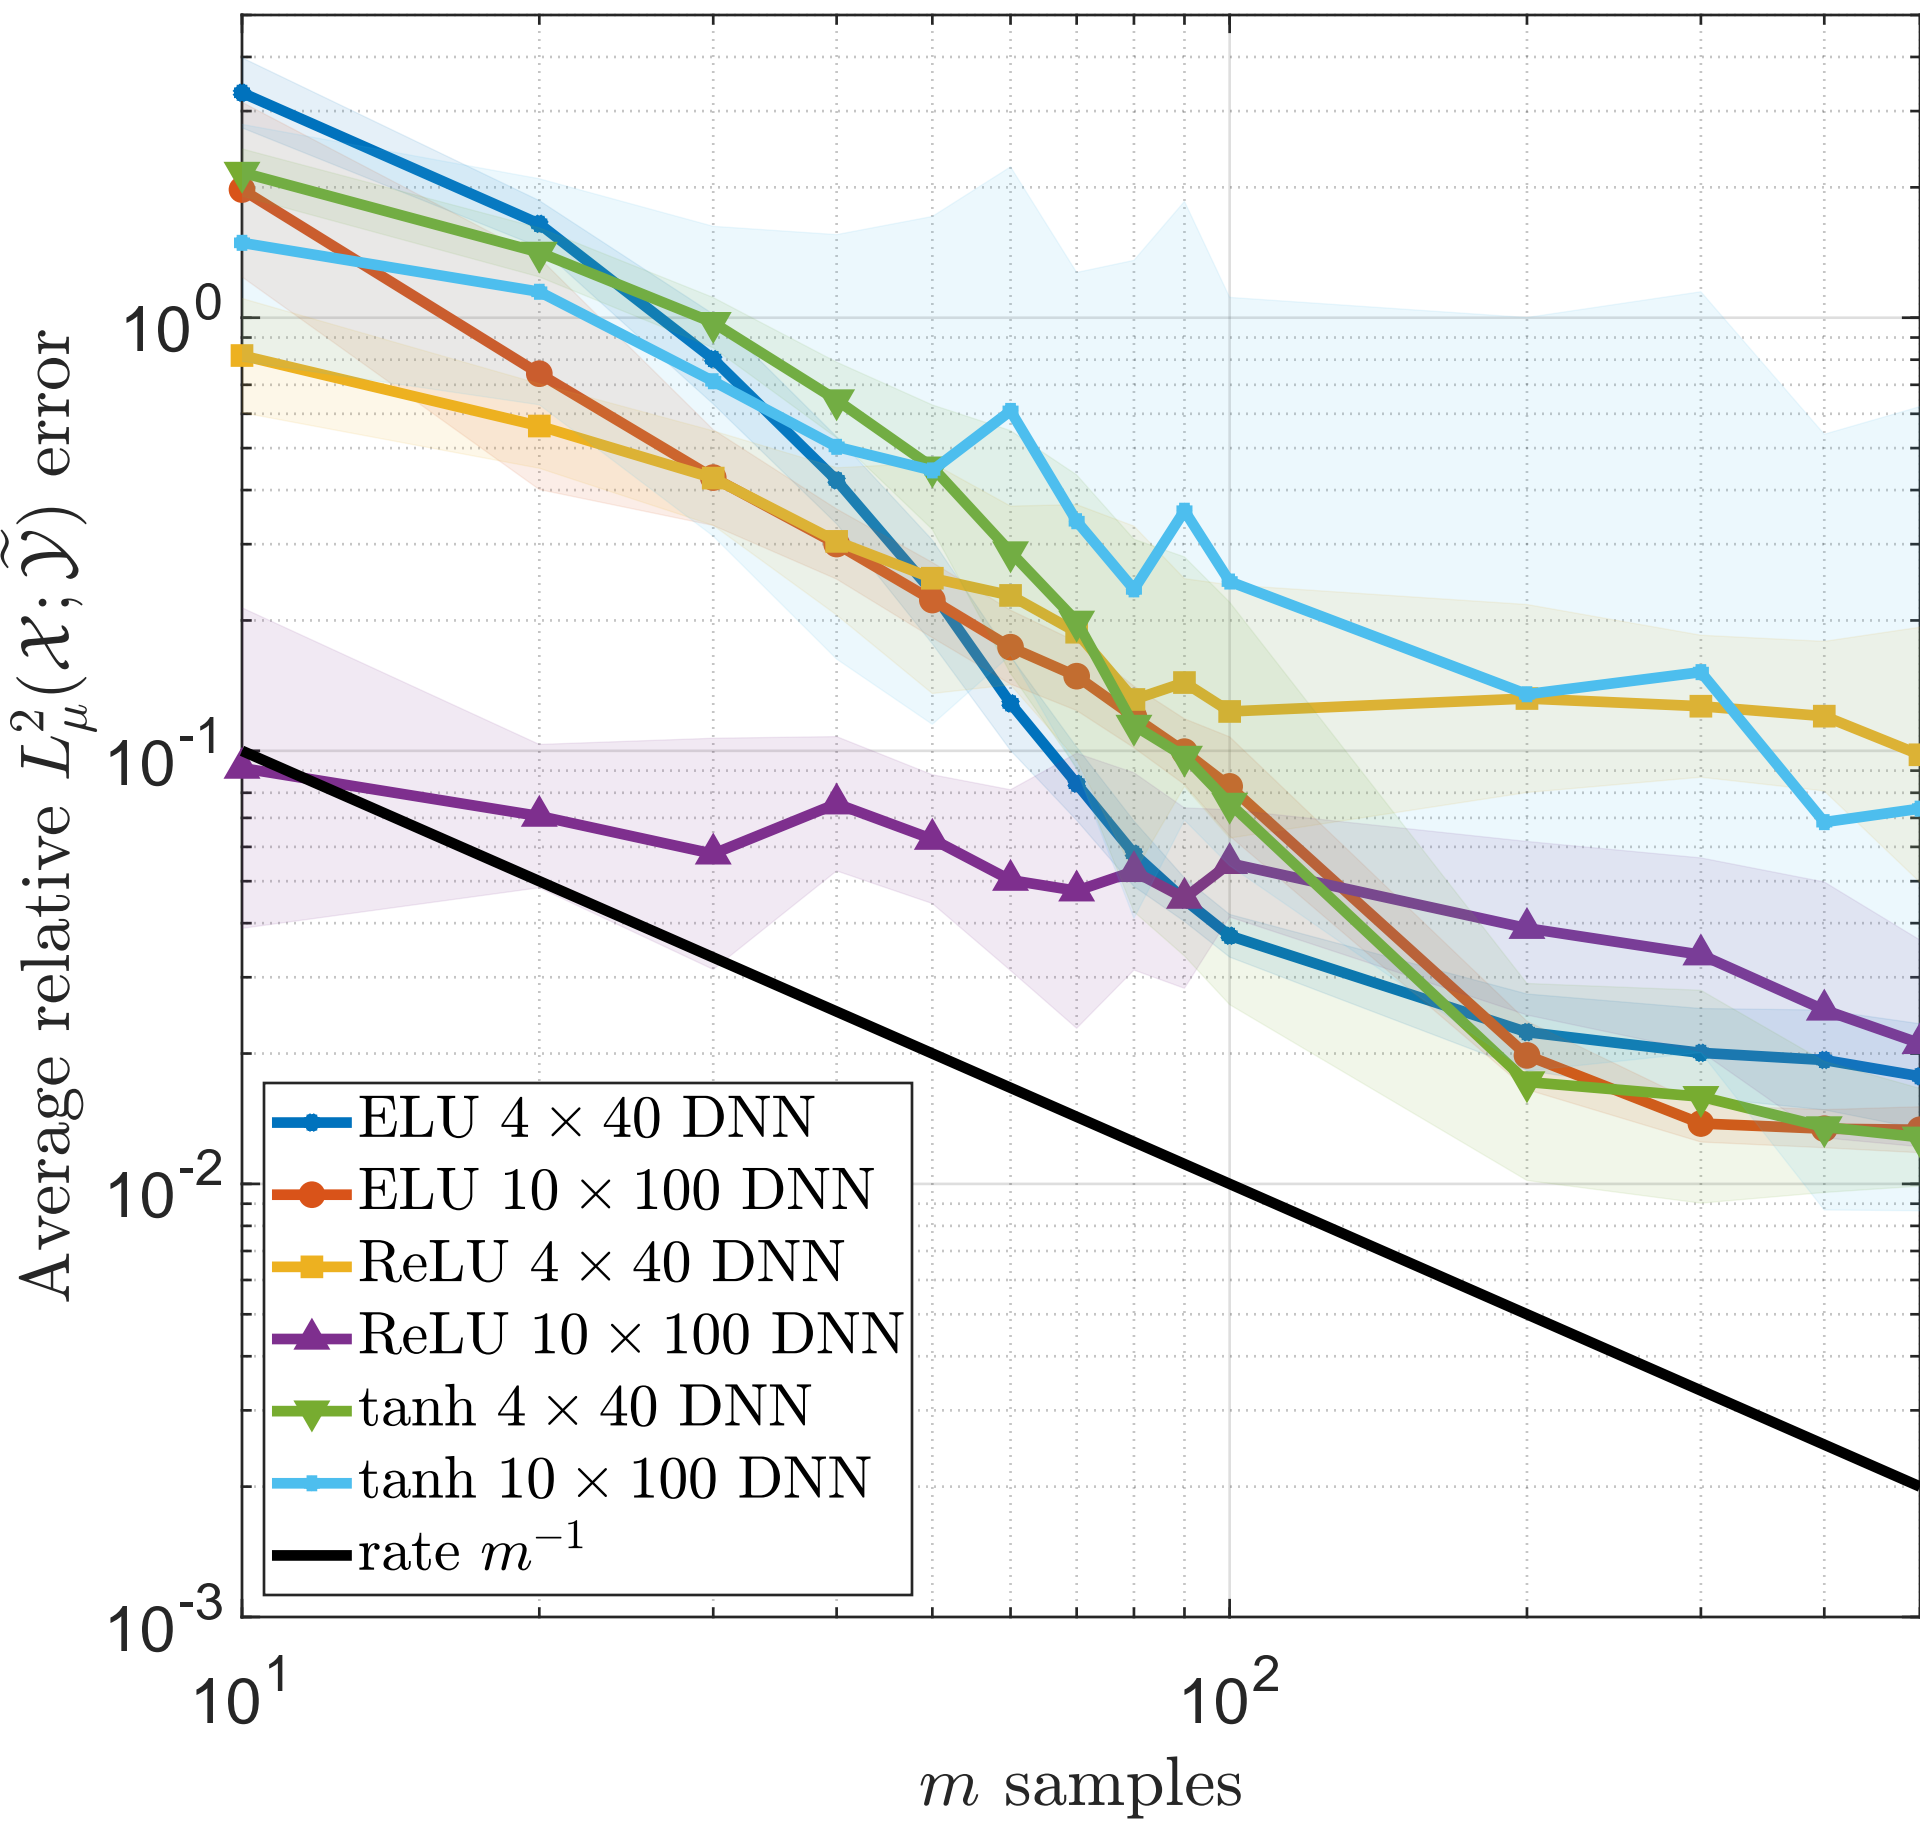

Supplement: supplementary_material [file attachment]

LogKL coeff. Boussinesq  $p \in L_0^2(\Omega)$ ,  $d = 8$

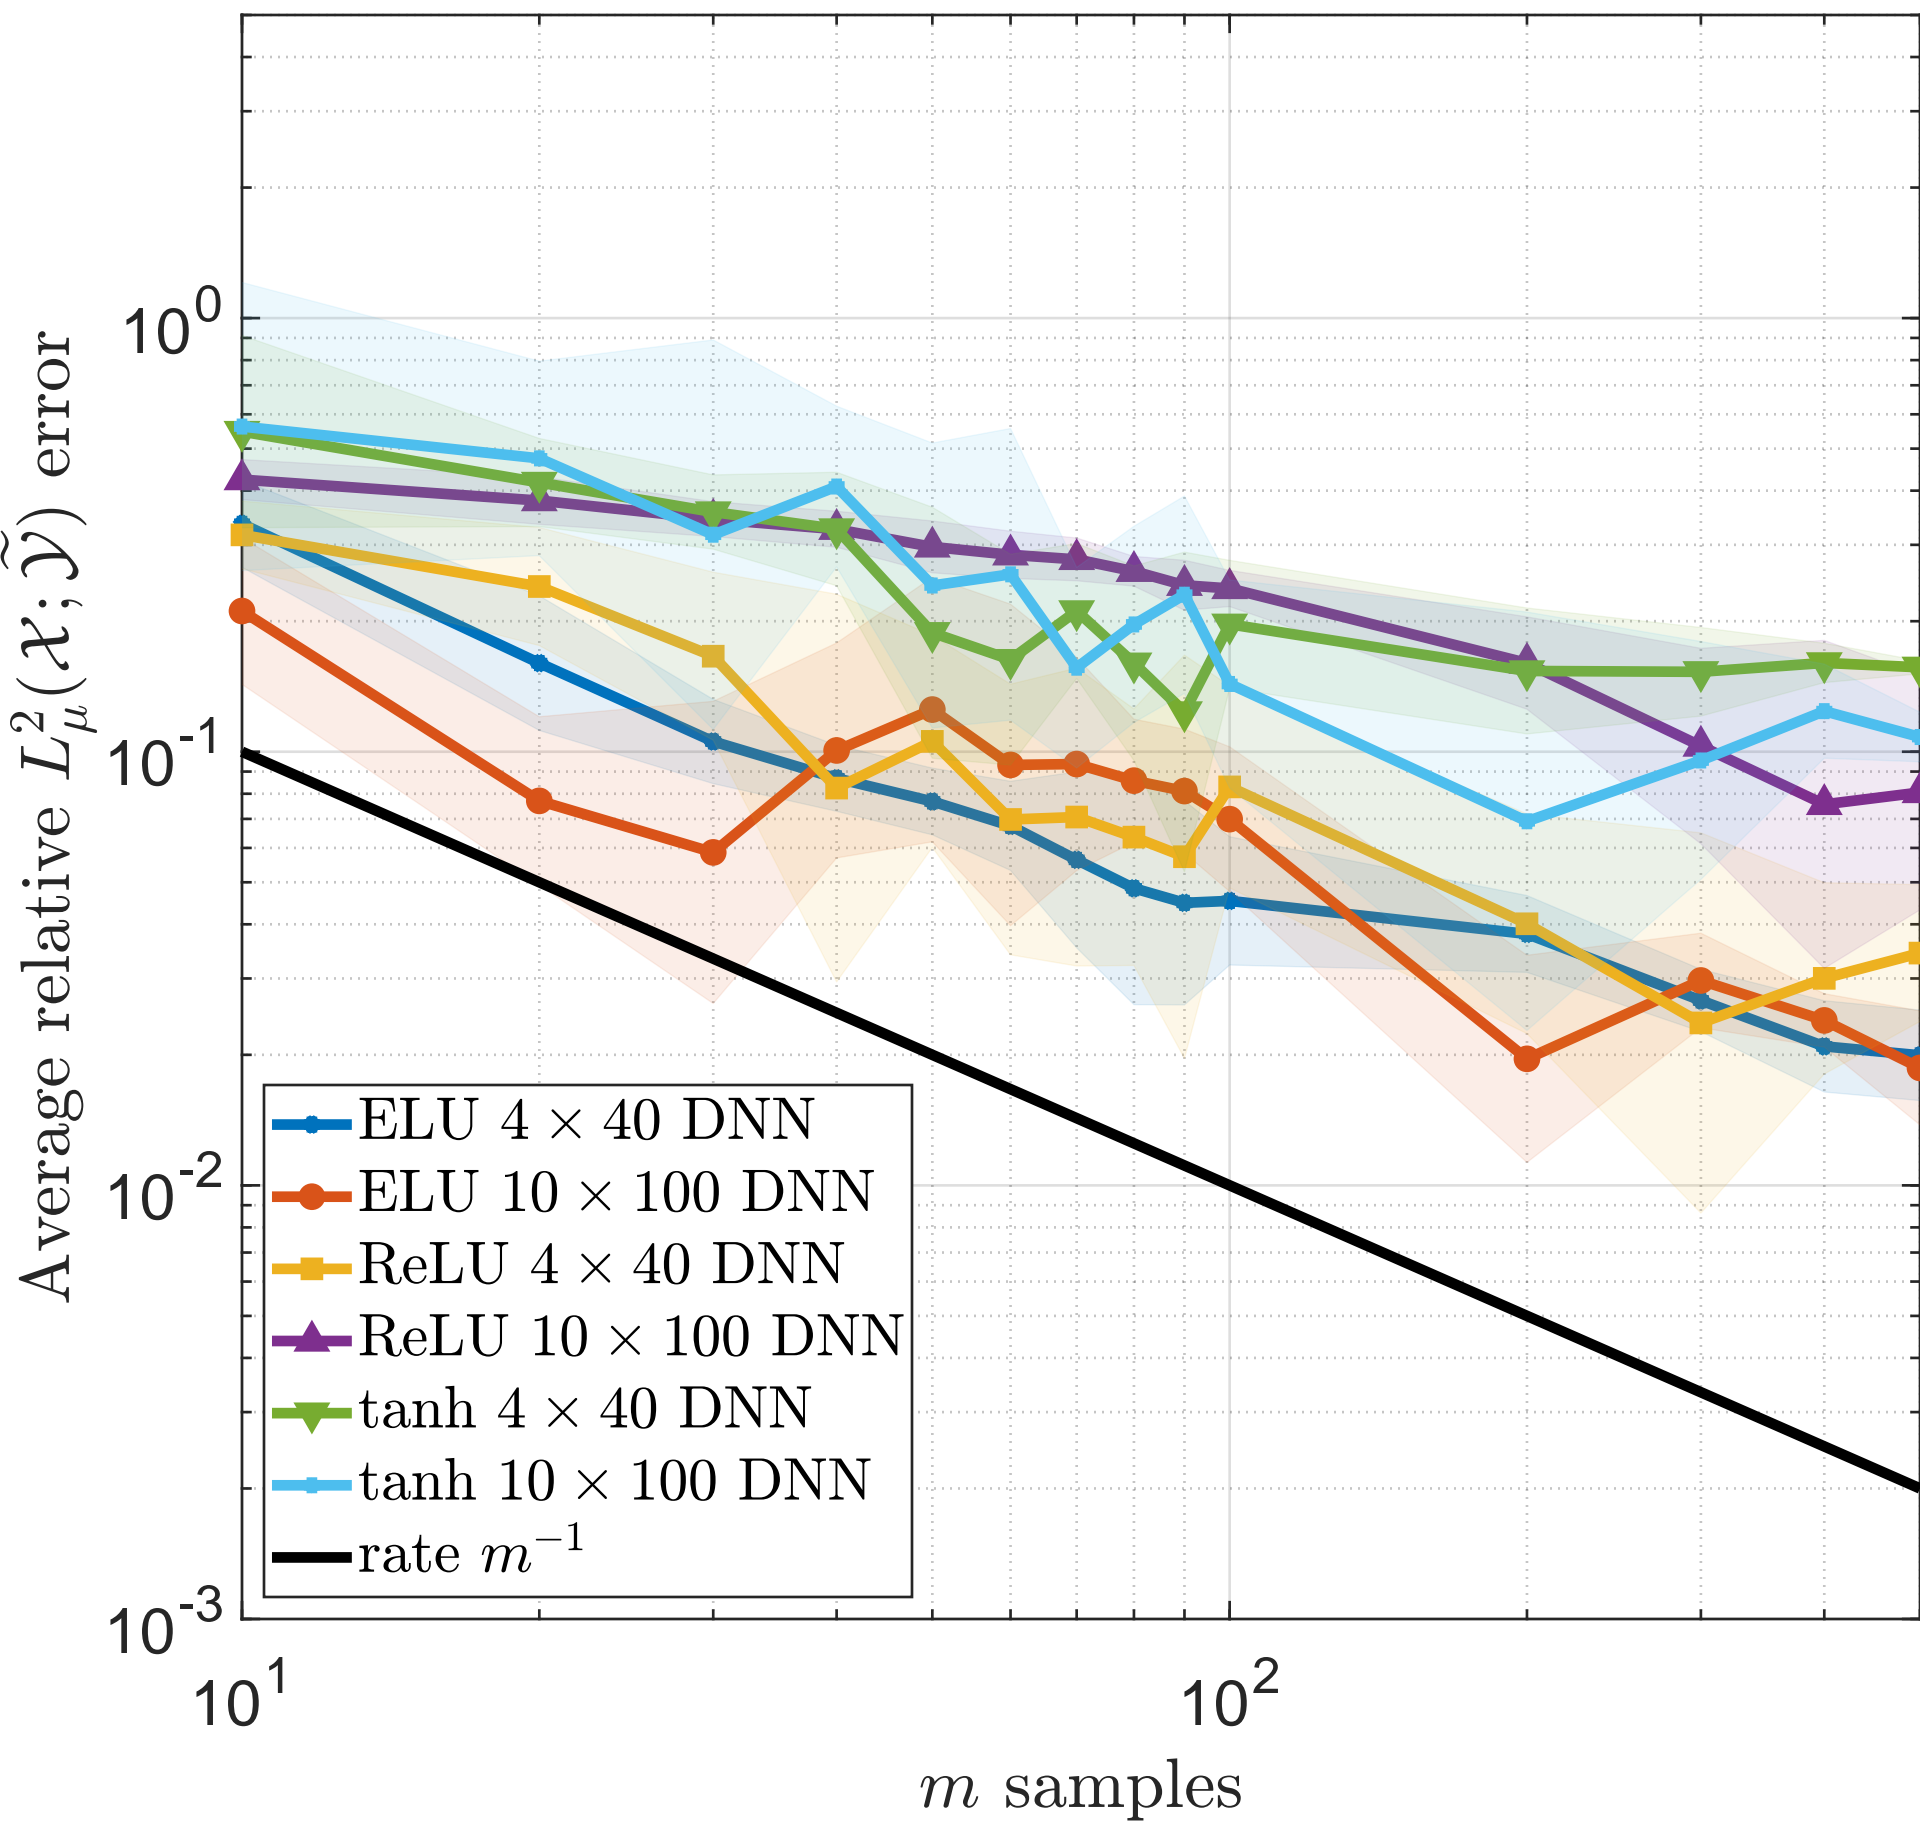

Supplement: supplementary_material [file attachment]

Affine coeff. NSB  $p \in L^2(\Omega)$ ,  $d = 4$

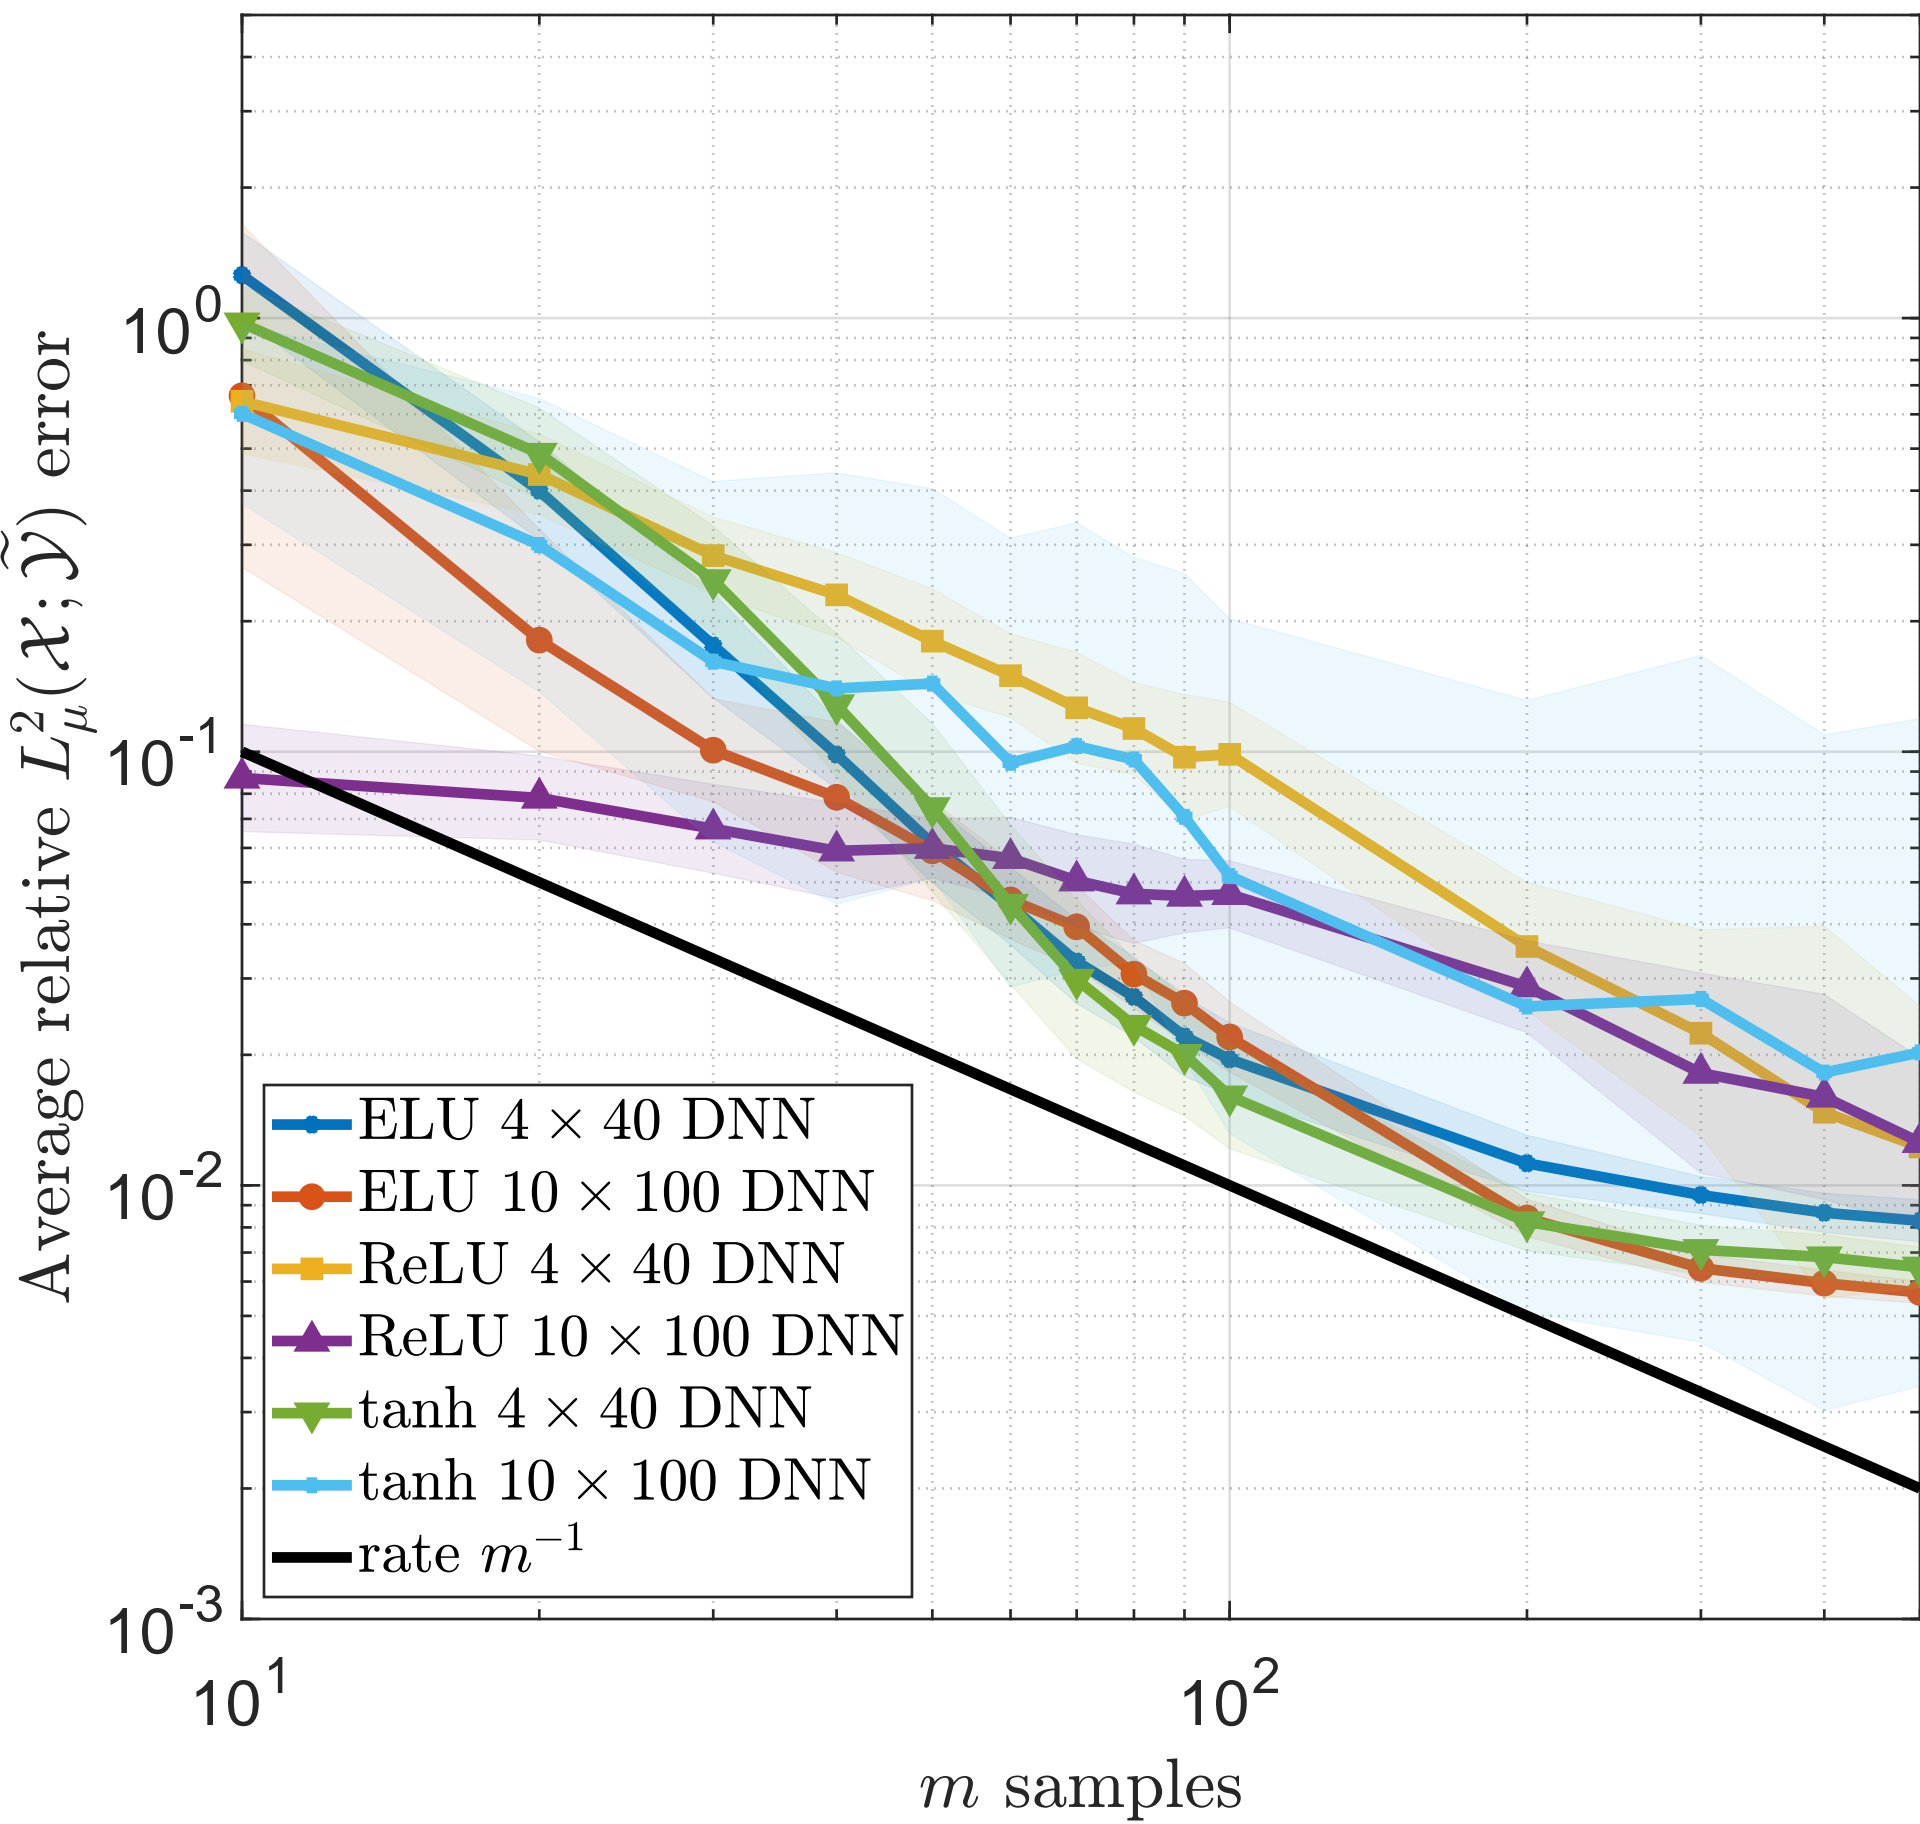

Supplement: supplementary_material [file attachment]

Affine coeff. Boussinesq  $\varphi \in L^4(\Omega)$ ,  $d=8$

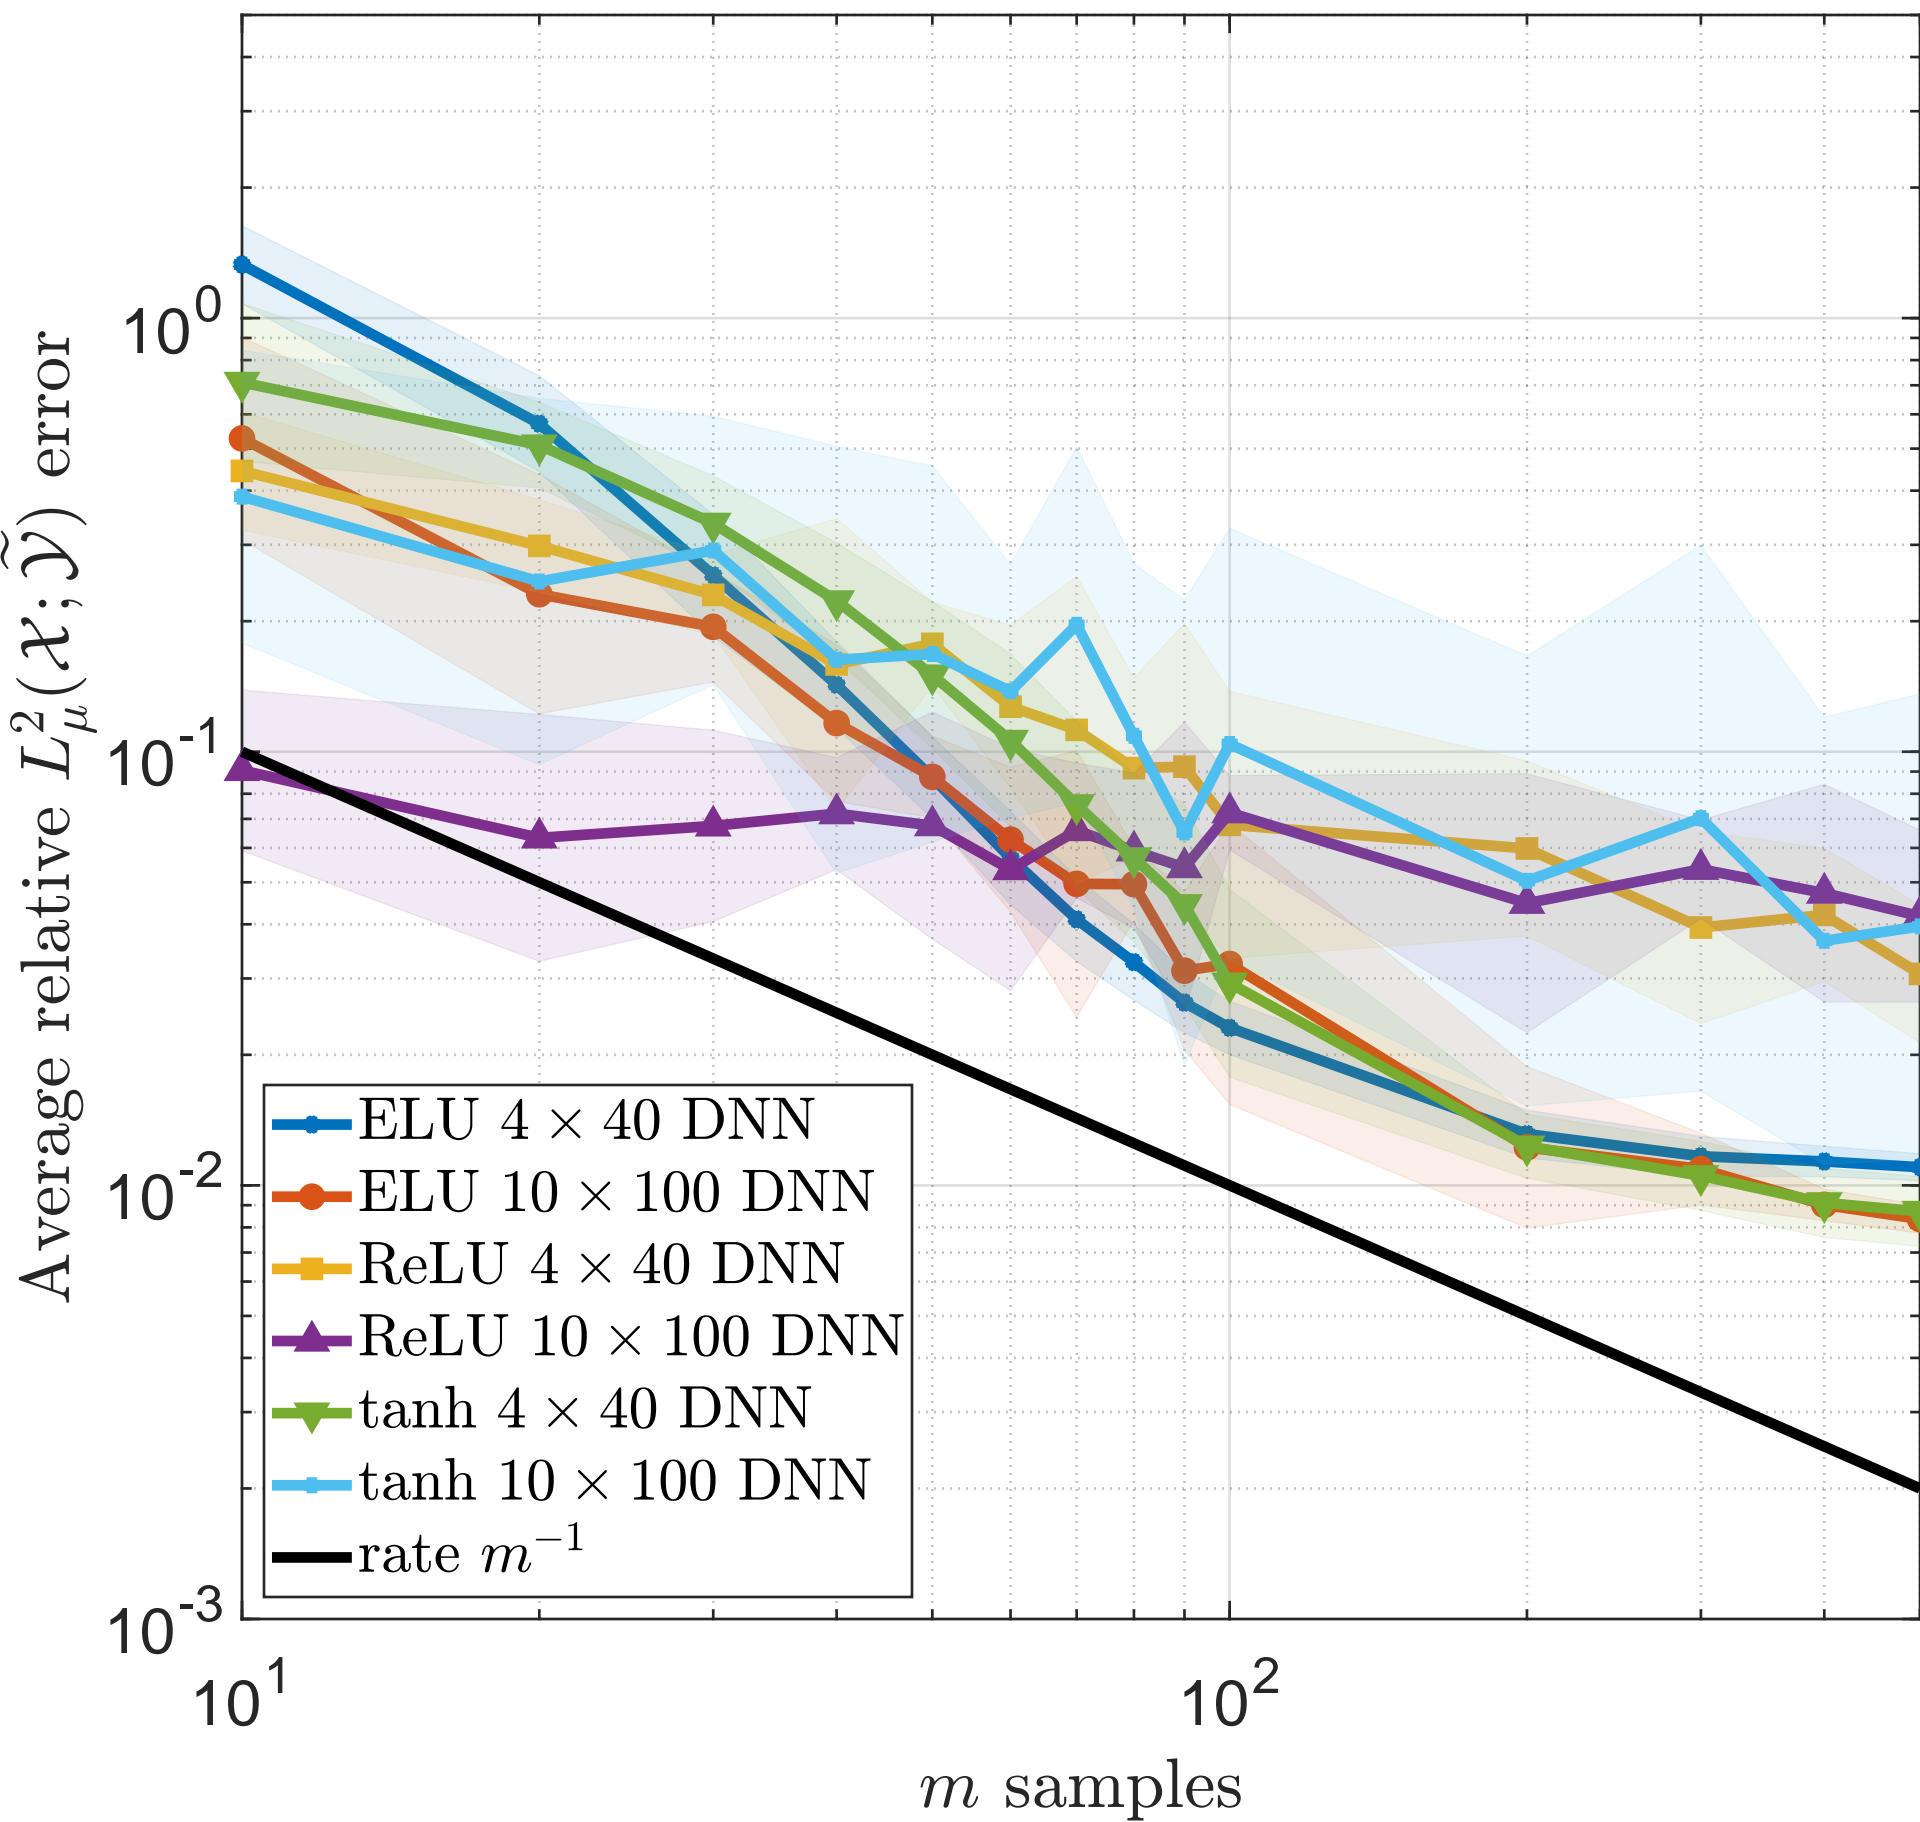

Supplement: supplementary_material [file attachment]

LogKL coeff. NSB  $u \in \mathbf{L}^4(\Omega)$ ,  $d = 4$

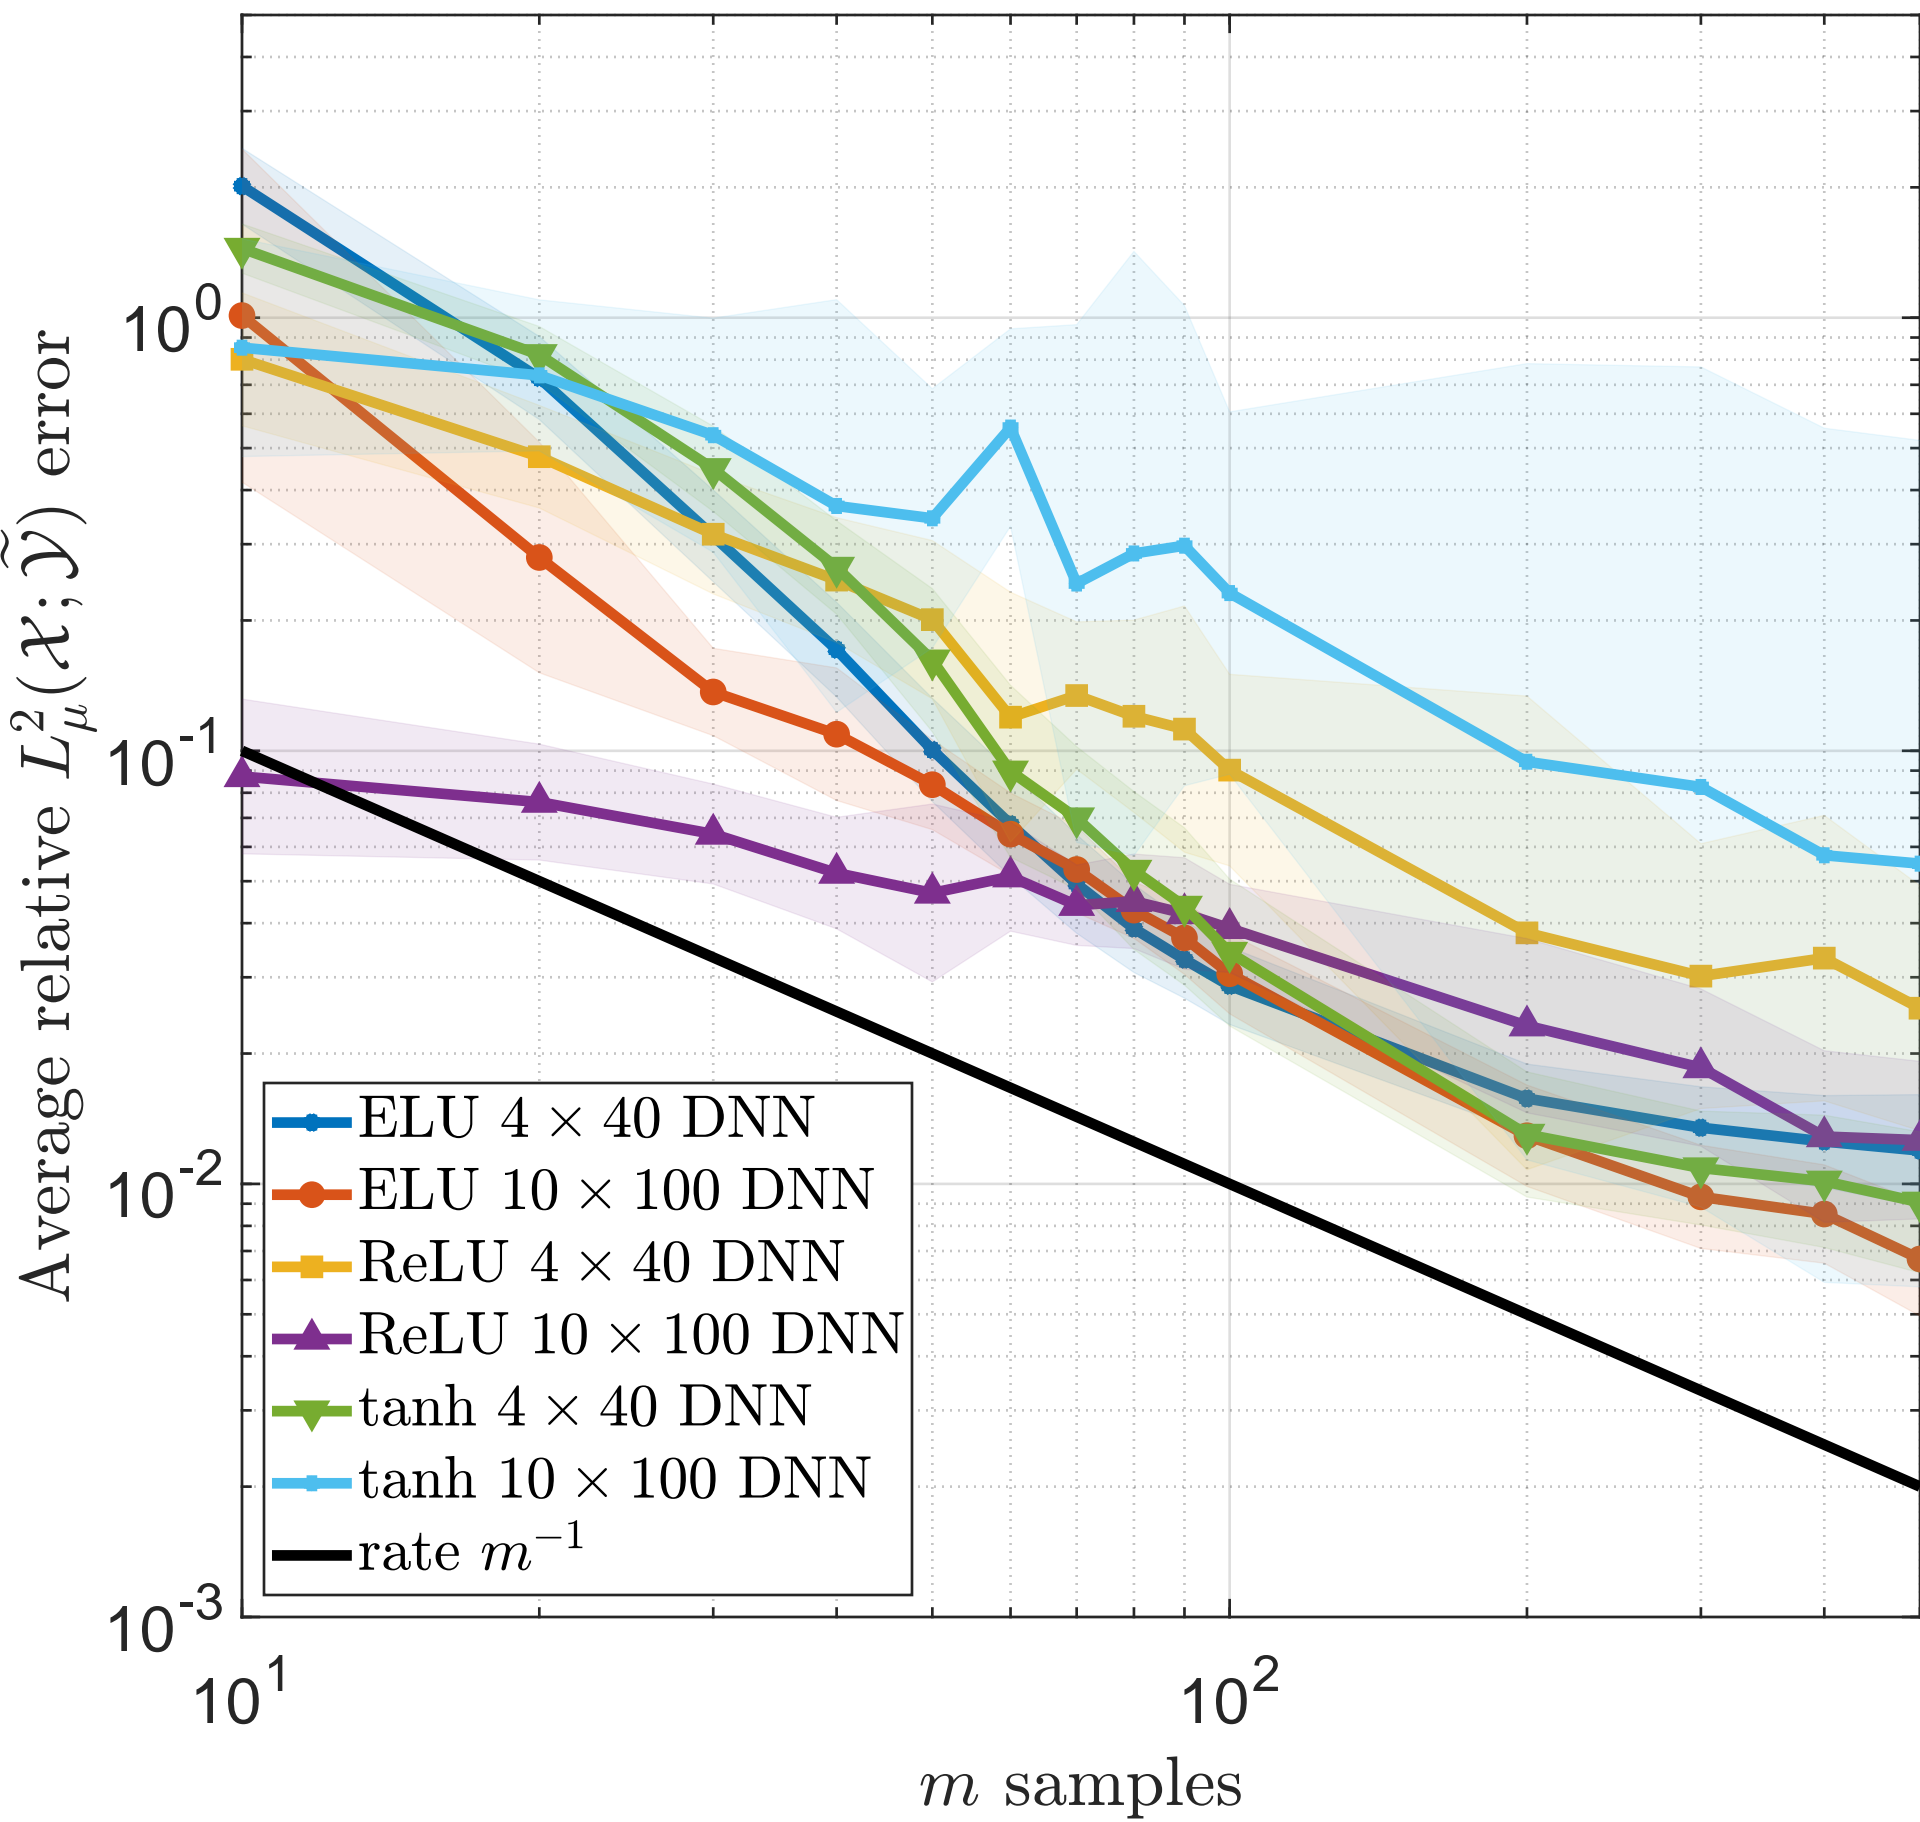

Supplement: supplementary_material [file attachment]

LogKL coeff. Poisson  $u \in L^2(\Omega)$ ,  $d = 4$

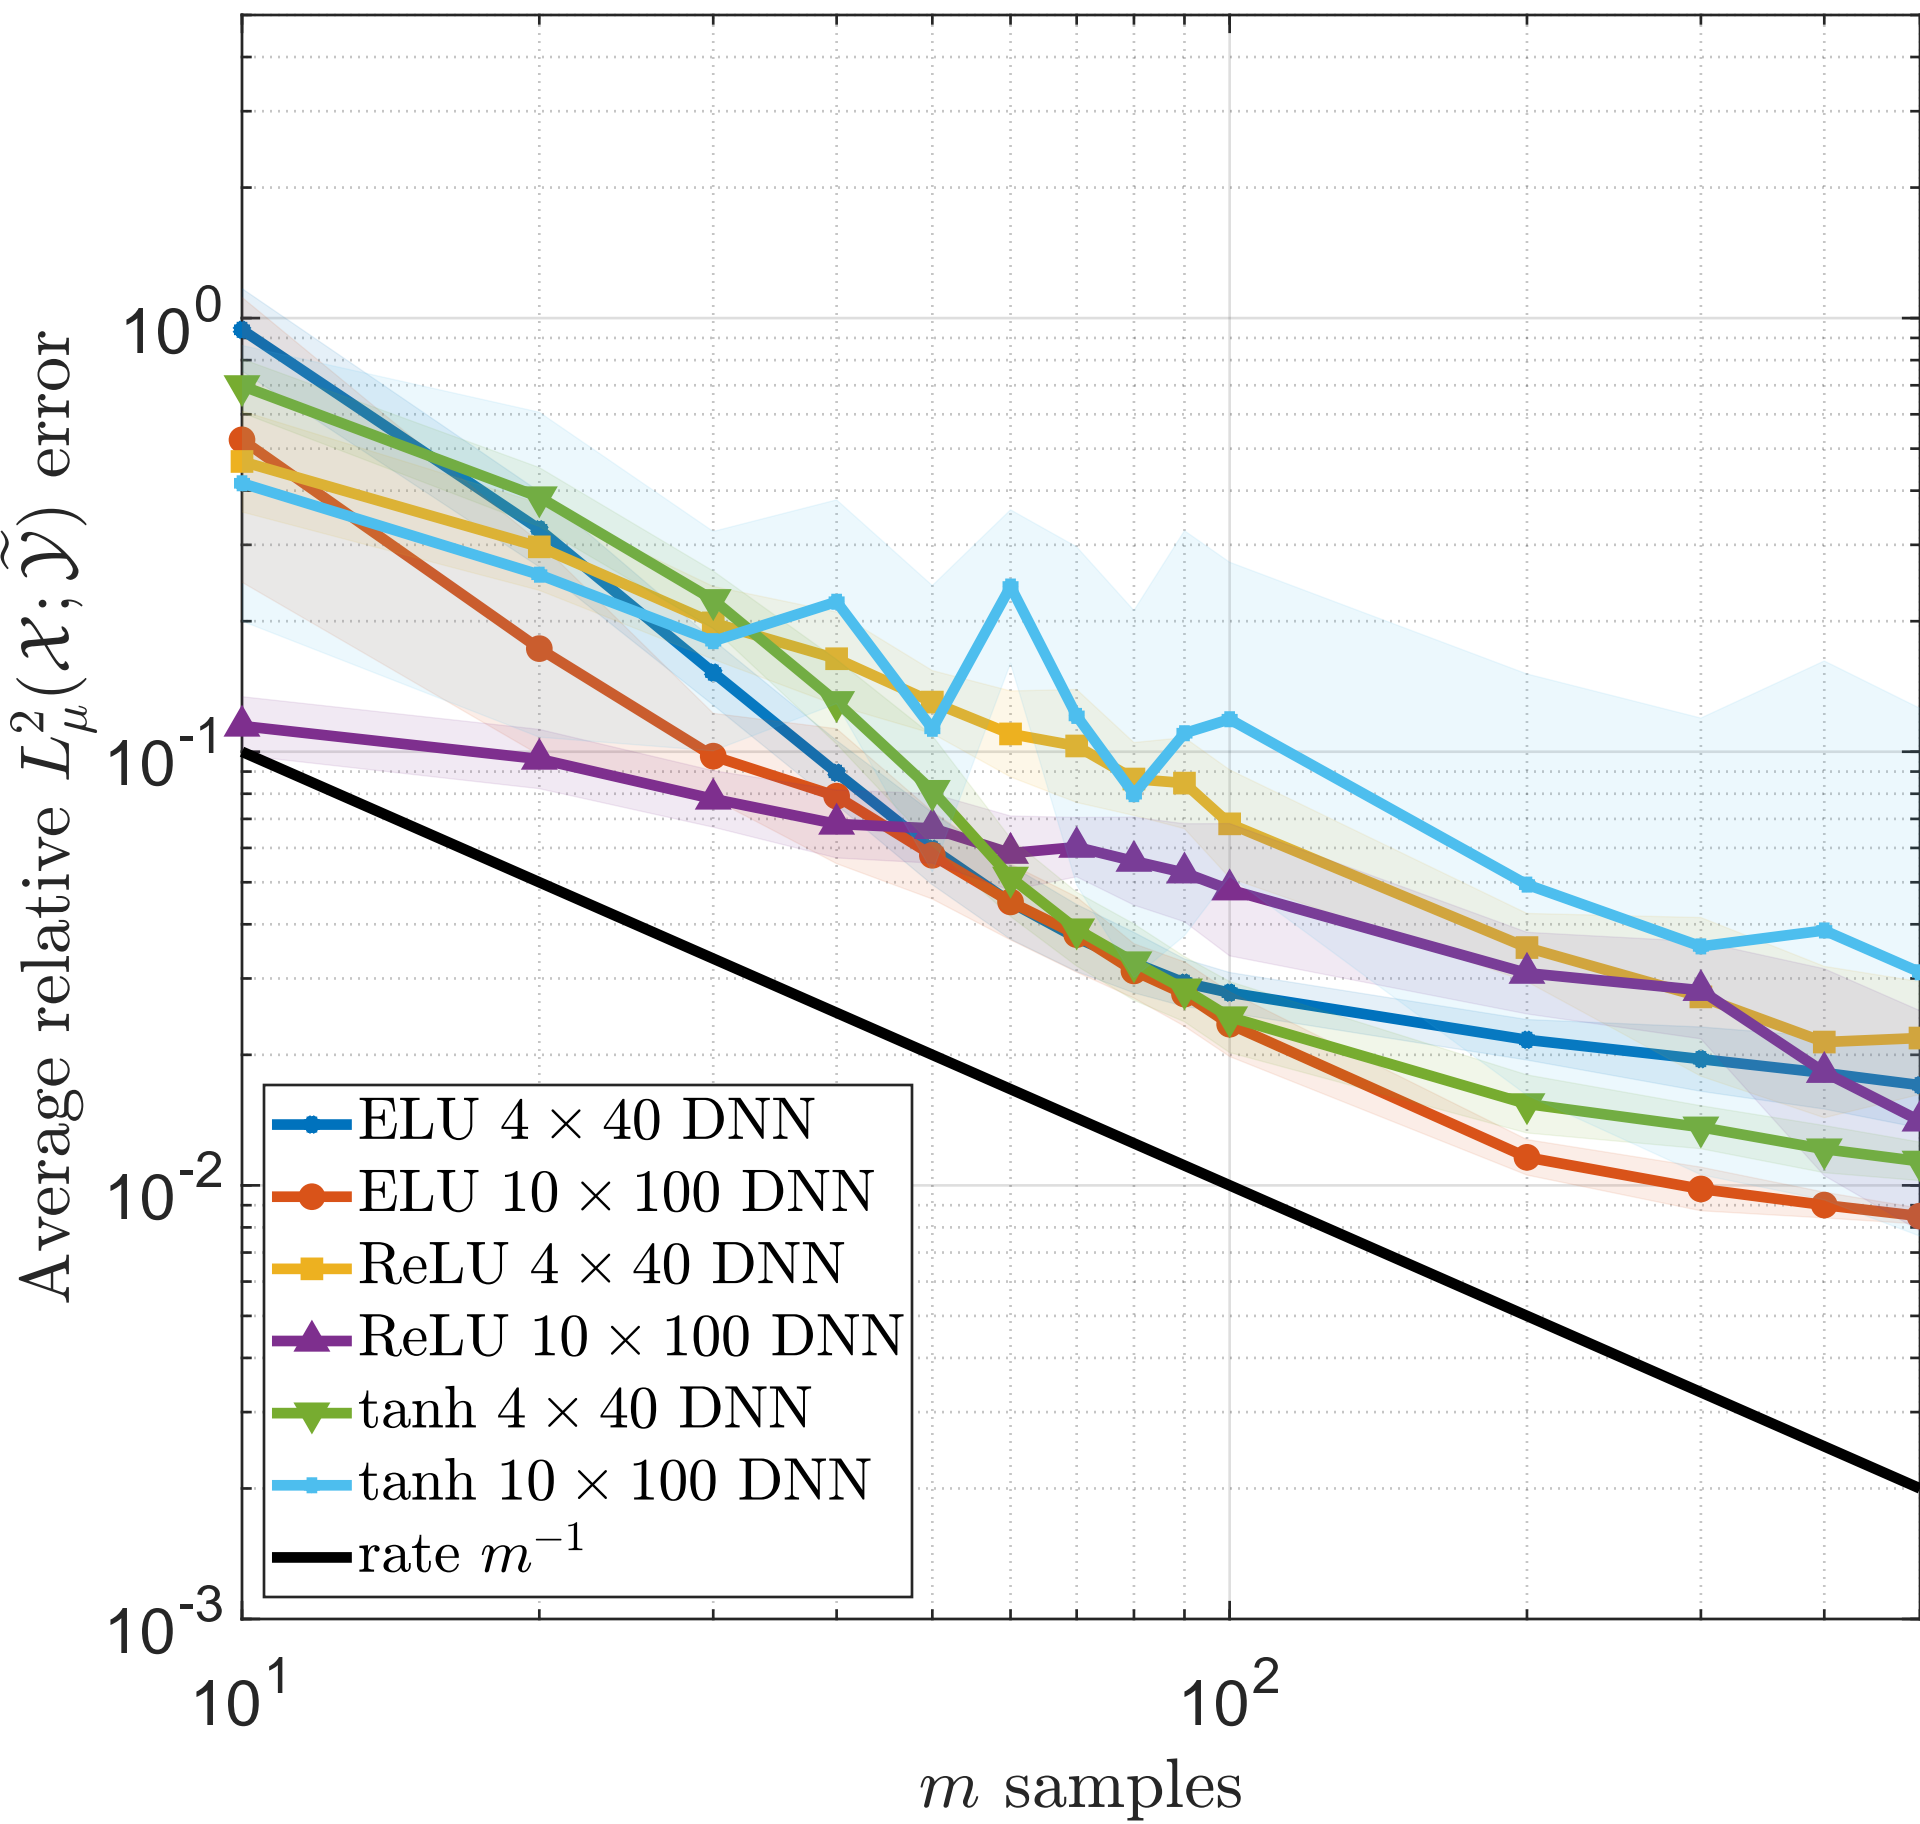

Supplement: supplementary_material [file attachment]
